# Supplementary material for: Dysregulated heparan sulfate proteoglycan metabolism promotes Ewing sarcoma tumor growth
Source: eLife. 2022 Mar 14;11:e69734. doi: 10.7554/eLife.69734 (PMC8942468; doi:10.7554/eLife.69734)
Supplement: Supplementary file 1. [file elife-69734-supp1.xlsx]

## Sheet: Sheet1
Supplemental Table 1: Detailed characterization of zebrafish tumors driven by EWSR1-FLI1 expression
Fish #	Age	Sex	# if sections on slide	Fish size (not including tail, microscopic, cm)	Tumor location				Tumor morphology
									Growth pattern				Nuclear size				Nuclear shape				Nuclear molding				Nuclear pleomorphism				Nuclear chromatin pattern				Cytoplasm				Necrosis				Mitosis				Karyorrhaxis				Angiogensis
					Tumor #1	Tumor #2	Tumor #3	Tumor #4	Tumor #1	Tumor #2	Tumor #3	Tumor #4	Tumor #1	Tumor #2	Tumor #3	Tumor #4	Tumor #1	Tumor #2	Tumor #3	Tumor #4	Tumor #1	Tumor #2	Tumor #3	Tumor #4	Tumor #1	Tumor #2	Tumor #3	Tumor #4	Tumor #1	Tumor #2	Tumor #3	Tumor #4	Tumor #1	Tumor #2	Tumor #3	Tumor #4	Tumor #1	Tumor #2	Tumor #3	Tumor #4	Tumor #1	Tumor #2	Tumor #3	Tumor #4	Tumor #1	Tumor #2	Tumor #3	Tumor #4	Tumor #1
D1570		F	4	1.7	Intramuscular: dosal, abdominal	SubQ: at base of dosal fin	N/A	N/A	Diffuse/ infiltrative between muscle fibers Minimal distruction of myocytes	Infiltrative but confined within subQ without distruction	N/A	N/A	Medium	Small > medium (SRBCT)	N/A	N/A	Oval, spindled	Round-oval, some angulation (partially due to molding)	N/A	N/A	Mild	Prominent	N/A	N/A	Mild	Mild	N/A	N/A	Smudgy	Hyperchromatic	N/A	N/A	Eosinophilic matrix/somewhat vesicular	None/ scant	N/A	N/A	None	None	N/A	N/A	0-1/10 HPF	None in the focus	N/A	N/A	0-1/10 HPF	1-2/10 HPF	N/A	N/A	Extensive
D1571		F	4	1.5	Intramuscular: dosal-lateral to head area (inferior)	SubQ at base of dosal fin	SubQ: at base of anal fin	N/A	Diffuse/ infiltrative between muscle fibers focal distruction of myocytes	Infiltrative but confined within subQ without distruction	Infiltrative but confined within the space without distruction	N/A	Medium	Small > medium (SRBCT)	Small to medium (SRBCT)	N/A	Oval, spindled	Round-oval, some angulation (partially due to molding)	Round-oval, some angulation (partially due to molding)	N/A	Mild	Prominent	Prominent	N/A	Mild	Mild	Mild	N/A	Smudgy	Hyperchromatic	Hyperchromatic	N/A	Eosinophilic matrix/somewhat vesicular	None/ scant	None/ scant	N/A	None	None	None	N/A	1-2/10 HPF	None in the focus	None in the focus	N/A	0-1/10 HPF	5-6/10 HPF	5-6/10 HPF	N/A	Extensive
D1611		F	4	1.5	N/A
D1612		M	4	2	Intramuscular: dosal-lateral (posterior toward tail)	SubQ: at base of dosal fin	N/A	N/A	Diffuse/ infiltrative between muscle fibers focal distruction of myocytes	Widely infiltrative; mostly confined within subQ, focally infiltrating into muscle tissue	N/A	N/A	Medium	Small (SRBCT)	N/A	N/A	Oval, spindled	Round-oval, some angulation (partially due to molding)	N/A	N/A	Mild to moderate	Prominent	N/A	N/A	Mild-moderate	Mild	N/A	N/A	Smudgy	Hyperchromatic	N/A	N/A	Eosinophilic matrix	None/ scant	N/A	N/A	None	None	N/A	N/A	1-2/10 HPF	None in the focus	N/A	N/A	2-3/10 HPF	2-3/10 HPF	N/A	N/A	Extensive
D1613		M	4	1.5	Intramuscular: near tumor #2, 3, 4	SubQ: nose	SubQ: at base of dosal fin	SubQ: at base of anal fin	Infiltrative between muscle fibers	Infiltrative but confined within subQ, focally infiltrating into muscle tissue	Infiltrative; mostly confined within subQ, focally infiltrating into muscle tissue	Infiltrative; mostly confined within subQ, focally infiltrating into muscle tissue	Small-medium	Small (SRBCT)	Small (SRBCT)	Small (SRBCT)	Oval, spindled	Round-oval, some angulation (partially due to molding)	Round-oval, some angulation (partially due to molding)	Round-oval, some angulation (partially due to molding)	Mild	Prominent	Prominent	Prominent	Mild	Mild	Mild	Mild	Smudgy	Hyperchromatic	Hyperchromatic	Hyperchromatic	Scant	None/ scant	None/ scant	None/ scant	None	None	None	None	None in the foci	None in the focus	None in the focus	None in the focus	None in the foci	1-2/10 HPF	1-2/10 HPF	1-2/10 HPF	Extensive
D1614		M	4	2.2	N/A	SubQ: at base of dosal fin	SubQ: at base of anal fin	N/A	N/A	Infiltrative but confined within subQ without distruction	Infiltrative but confined within the space without distruction	N/A	N/A	Small (SRBCT)	Small (SRBCT)	N/A	N/A	Round-oval, some angulation (partially due to molding)	Round-oval, some angulation (partially due to molding)	N/A	N/A	Prominent	Prominent	N/A	N/A	Mild	Mild	N/A	N/A	Hyperchromatic	Hyperchromatic	N/A	N/A	None/ scant	None/ scant	N/A	N/A	None	None	N/A	N/A	None in the focus	None in the focus	N/A	N/A	0-1/10 HPF	0-1/10 HPF	N/A	N/A
D1615		F	3	1.9	N/A	SubQ: at base of dosal fin	N/A	N/A	N/A	Infiltrative; mostly confined within subQ, focally infiltrating into muscle tissue	N/A	N/A	N/A	Small > medium (SRBCT)	N/A	N/A	N/A	Round-oval, some angulation (partially due to molding)	N/A	N/A	N/A	Prominent	N/A	N/A	N/A	Mild	N/A	N/A	N/A	Hyperchromatic	N/A	N/A	N/A	None/ scant	N/A	N/A	N/A	None	N/A	N/A	N/A	None in the focus	N/A	N/A	N/A	1-2/10 HPF	N/A	N/A	N/A
D1616		M	4	1.5	N/A	SubQ: at base of dosal fin	N/A	N/A	N/A	Infiltrative; mostly confined within subQ, focally infiltrating into muscle tissue	N/A	N/A	N/A	Small > medium (SRBCT)	N/A	N/A	N/A	Round-oval, some angulation (partially due to molding)	N/A	N/A	N/A	Prominent	N/A	N/A	N/A	Mild	N/A	N/A	N/A	Hyperchromatic	N/A	N/A	N/A	None/ scant	N/A	N/A	N/A	None	N/A	N/A	N/A	None in the focus	N/A	N/A	N/A	0-1/10 HPF	N/A	N/A	N/A
D1551		F	4	0.9	N/A	SubQ: at base of dosal fin	SubQ: at base of anal fin	SubQ: at base of tail	N/A	Infiltrative; mostly confined within subQ, focally infiltrating into muscle tissue	Infiltrative; mostly confined within subQ, focally infiltrating into muscle tissue	Infiltrative but confined within the space without distruction	N/A	Small (SRBCT)	Small (SRBCT)	Small (SRBCT)	N/A	Round-oval, some angulation (partially due to molding)	Round-oval, some angulation (partially due to molding)	Round-oval, some angulation (partially due to molding)	N/A	Prominent	Prominent	Prominent	N/A	Mild	Mild	Mild	N/A	Hyperchromatic	Hyperchromatic	Hyperchromatic	N/A	None/ scant	None/ scant	None/ scant	N/A	None	None	None	N/A	Rare	None in the focus	None in the focus	N/A	5-6/10 HPF	None	0-1/10 HPF	N/A
D1552		?	4	0.5	N/A	SubQ: at base of dosal fin	N/A	N/A	N/A	Infiltrative; mostly confined within subQ, focally infiltrating into muscle tissue	N/A	N/A	N/A	Small (SRBCT)	N/A	N/A	N/A	Round-oval, some angulation (partially due to molding)	N/A	N/A	N/A	Mild	N/A	N/A	N/A	Mild	N/A	N/A	N/A	Hyperchromatic	N/A	N/A	N/A	None/ scant	N/A	N/A	N/A	None	N/A	N/A	N/A	None in the focus	N/A	N/A	N/A	0-1/10 HPF	None	None	N/A
D1553		F	4	0.8	Intramuscular: near tail	N/A	N/A	N/A	Diffuse/ infiltrative between muscle fibers Minimal distruction of myocytes	N/A	N/A	N/A	Small-medium	N/A	N/A	N/A	Oval, spindled	N/A	N/A	N/A	Mild	N/A	N/A	N/A	Mild	N/A	N/A	N/A	Smudgy	N/A	N/A	N/A	Eosinophilic matrix	N/A	N/A	N/A	None	N/A	N/A	N/A	None in the foci	N/A	N/A	N/A	0-1/10 HPF	N/A	N/A	N/A	Minimal
D1555		F	4	0.6	N/A	SubQ: at base of dosal fin	N/A	N/A	N/A	Infiltrative but confined within subQ without distruction	N/A	N/A	N/A	Small (SRBCT)	N/A	N/A	N/A	Round-oval, some angulation (partially due to molding)	N/A	N/A	N/A	Prominent	N/A	N/A	N/A	Mild	N/A	N/A	N/A	Hyperchromatic	N/A	N/A	N/A	None/ scant	N/A	N/A	N/A	None	N/A	N/A	N/A	None in the focus	N/A	N/A	N/A	0-1/10 HPF	N/A	N/A	N/A
D1558		?	4	0.35	N/A	SubQ: at base of tail	N/A	N/A	N/A	Infiltrative but confined within subQ without distruction	N/A	N/A	N/A	Small (SRBCT)	N/A	N/A	N/A	Round-oval, some angulation (partially due to molding)	N/A	N/A	N/A	Prominent	N/A	N/A	N/A	Mild	N/A	N/A	N/A	Hyperchromatic	N/A	N/A	N/A	None/ scant	N/A	N/A	N/A	None	N/A	N/A	N/A	None in the focus	N/A	N/A	N/A	0-1/10 HPF	N/A	N/A	N/A
D1559		?	4	0.8	Intramuscular: near dosal fin	N/A	N/A	N/A	Diffuse/ infiltrative between muscle fibers No distruction of myocytes	N/A	N/A	N/A	Small-medium	N/A	N/A	N/A	Oval, spindled	N/A	N/A	N/A	Mild	N/A	N/A	N/A	N/A	Mild	N/A	N/A	Smudgy	N/A	N/A	N/A	Scant	N/A	N/A	N/A	None	N/A	N/A	N/A	None in the foci	N/A	N/A	N/A	None in the foci	N/A	N/A	N/A	Minimal
D1560		F	4	0.3	N/A	SubQ: at base of dosal fin	SubQ: at base of anal fin	N/A	N/A	Infiltrative but confined within subQ without distruction	Infiltrative but confined within the space without distruction	N/A	N/A	Small (SRBCT)	Small (SRBCT)	N/A	N/A	Round-oval, some angulation (partially due to molding)	Round-oval, some angulation (partially due to molding)	N/A	N/A	Prominent	Prominent	N/A	N/A	Mild	Mild	N/A	N/A	Hyperchromatic	Hyperchromatic	N/A	N/A	None/ scant	None/ scant	N/A	N/A	None	None	N/A	N/A	None in the focus	None in the focus	N/A	N/A	None in the focus	None in the focus	N/A	N/A
D1561		?	4	0.3	N/A	SubQ: at base of dosal fin	SubQ: at base of anal fin	N/A	N/A	Infiltrative; mostly confined within subQ, focally infiltrating into muscle tissue	Infiltrative; mostly confined within subQ, focally infiltrating into muscle tissue	N/A	N/A	Small (SRBCT)	Small (SRBCT)	N/A	N/A	Round-oval, some angulation (partially due to molding)	Round-oval, some angulation (partially due to molding)	N/A	N/A	Prominent	Prominent	N/A	N/A	Mild	Mild	N/A	N/A	Hyperchromatic	Hyperchromatic	N/A	N/A	None/ scant	None/ scant	N/A	N/A	None	None	N/A	N/A	None in the focus	None in the focus	N/A	N/A	None in the focus	None in the focus	N/A	N/A
D1562		?	4	0.5	N/A	SubQ: at base of dosal fin	SubQ: at base of anal fin	N/A	N/A	Infiltrative; mostly confined within subQ, focally infiltrating into muscle tissue	Infiltrative; mostly confined within subQ, focally infiltrating into muscle tissue	N/A	N/A	Small (SRBCT)	Small (SRBCT)	N/A	N/A	Round-oval, some angulation (partially due to molding)	Round-oval, some angulation (partially due to molding)	N/A	N/A	Prominent	Prominent	N/A	N/A	Mild	Mild	N/A	N/A	Hyperchromatic	Hyperchromatic	N/A	N/A	None/ scant	None/ scant	N/A	N/A	None	None	N/A	N/A	None in the focus	None in the focus	N/A	N/A	None in the focus	None in the focus	N/A	N/A
D1563		?	4	0.5	N/A	SubQ: at base of dosal fin	SubQ: at base of anal fin	N/A	N/A	Infiltrative but confined within subQ without distruction	Infiltrative but confined within subQ without distruction	N/A	N/A	Small (SRBCT)	Small (SRBCT)	N/A	N/A	Round-oval, some angulation (partially due to molding)	Round-oval, some angulation (partially due to molding)	N/A	N/A	Prominent	Prominent	N/A	N/A	Mild	Mild	N/A	N/A	Hyperchromatic	Hyperchromatic	N/A	N/A	None/ scant	None/ scant	N/A	N/A	None	None	N/A	N/A	None in the focus	None in the focus	N/A	N/A	None in the focus	None in the focus	N/A	N/A
D1566		F	4	0.9	N/A	SubQ: at base of dosal fin	SubQ: at base of anal fin	SubQ: at base of tail	N/A	Infiltrative; mostly confined within subQ, focally infiltrating into muscle tissue	Infiltrative but confined within subQ without distruction	Infiltrative; mostly confined within subQ, focally infiltrating into muscle tissue	N/A	Small (SRBCT)	Small (SRBCT)	Small (SRBCT)	N/A	Round-oval, some angulation (partially due to molding)	Round-oval, some angulation (partially due to molding)	Round-oval, some angulation (partially due to molding)	N/A	Prominent	Prominent	Prominent	N/A	Mild	Mild	Mild	N/A	Hyperchromatic	Hyperchromatic	Hyperchromatic	N/A	None/ scant	None/ scant	None/ scant	N/A	None	None	None	N/A	None in the focus	None in the focus	None in the focus	N/A	1-2/10 HPF	None in the focus	None in the focus	N/A
D1567		F	4	0.9	Intramuscular: dosal-lateral (posterior toward tail)	SubQ: at base of dosal fin	SubQ: at base of anal fin	N/A	Diffuse/ infiltrative between muscle fibers focal distruction of myocytes	Widely infiltrative; mostly confined within subQ, focally infiltrating into muscle tissue	Infiltrative but confined within subQ without distruction	N/A	Medium	Small (SRBCT)	Small (SRBCT)	N/A	Oval, spindled	Round-oval, some angulation (partially due to molding)	Round-oval, some angulation (partially due to molding)	N/A	Mild to moderate	Prominent	Prominent	N/A	Mild-moderate	Mild	Mild	N/A	Smudgy	Hyperchromatic	Hyperchromatic	N/A	Eosinophilic matrix	None/ scant	None/ scant	N/A	None	None	None	N/A	None in the foci	None in the focus	None in the focus	N/A	2-3/10 HPF	2-3/10 HPF	None in the focus	N/A	Extensive
D1646		M	2	2.5	N/A	SubQ: at base of dosal fin (small)	N/A	N/A	N/A	Small aggregate of hyperchromatic cells	N/A	N/A	N/A	Small (SRBCT)	N/A	N/A	N	Round-oval, some angulation (partially due to molding)	N/A	N/A	N/A	Prominent	N/A	N/A	N/A	Mild	N/A	N/A	N/A	Hyperchromatic	N/A	N/A	N/A	None/ scant	N/A	N/A	N/A	None	N/A	N/A	N/A	None in the focus	N/A	N/A	N/A	None in the focus	N/A	N/A	N/A
D1446		M	4	1.8	N/A
[truncated: 3 more columns]
