# Supplementary material for: Dysregulated heparan sulfate proteoglycan metabolism promotes Ewing sarcoma tumor growth
Source: eLife. 2022 Mar 14;11:e69734. doi: 10.7554/eLife.69734 (PMC8942468; doi:10.7554/eLife.69734)
Supplement: Supplementary file 2. [file elife-69734-supp2.xlsx]

## Sheet: EF1 vs Ctrl pval<0.05
Supplemental Table 2. List of downregulated and upregulated proteins identified by LC-MS/MS analysis in EWSR1-FLI1 expressing tumors, p < 0.05
Accession	Description	FC	pval	FDR
A0A0R4IJ07	Elongator complex protein 1 OS=Danio rerio OX=7955 GN=elp1 PE=1 SV=1	-15.8597	0.00254749	0.2375
F1REP7	Leucine-rich repeat-containing protein 40 OS=Danio rerio OX=7955 GN=lrrc40 PE=1 SV=1	-15.3119	0.000329956	0.2
E7FFU0	Zgc:152945 OS=Danio rerio OX=7955 GN=hbxb PE=1 SV=3	-15.282	0.0207929	0.376923
A0A0R4IUL0	Peptidylprolyl isomerase OS=Danio rerio OX=7955 GN=si:ch73-199g24.2 PE=1 SV=1	-15.0955	0.00191068	0.2375
E7F980	Si:cabz01007802.1 OS=Danio rerio OX=7955 GN=si:cabz01007802.1 PE=4 SV=1	-12.1371	0.0333578	0.502994
Q1LYG5	Eukaryotic translation elongation factor 2a, tandem duplicate 1 OS=Danio rerio OX=7955 GN=eef2a.1 PE=1 SV=2	-11.4508	0.0482873	0.557143
Q1L8P5	Si:dkey-228a15.1 OS=Danio rerio OX=7955 GN=si:dkey-228a15.1 PE=2 SV=1	-11.4006	0.0011366	0.2375
A0A0R4IQW7	UTP20 small subunit (SSU) processome component OS=Danio rerio OX=7955 GN=utp20 PE=1 SV=1	-10.5963	0.0492286	0.557143
F1RB36	2-hydroxyacyl-CoA lyase 1 OS=Danio rerio OX=7955 GN=hacl1 PE=1 SV=1	-10.2306	0.0409469	0.545455
A0A2R8Q264	Uncharacterized protein OS=Danio rerio OX=7955 GN=pigt PE=4 SV=1	-10.1465	0.049792	0.557143
F1Q618	Si:ch1073-335m2.2 OS=Danio rerio OX=7955 GN=si:ch1073-335m2.2 PE=1 SV=2	-8.51941	0.0497245	0.557143
A0A0R4IRS1	Adaptor-related protein complex 1 subunit mu 1 OS=Danio rerio OX=7955 GN=ap1m1 PE=1 SV=1	-4.35361	0.0388996	0.52973
Q6PBK3	40S ribosomal protein S28 OS=Danio rerio OX=7955 GN=rps28 PE=3 SV=1	-2.4611	0.037376	0.52973
F1RA03	Vimentin-related 1 OS=Danio rerio OX=7955 GN=vimr1 PE=1 SV=2	-2.06401	0.0178578	0.352941
A2AR70	6-phosphofructo-2-kinase/fructose-2,6-biphosphatase 1 OS=Danio rerio OX=7955 GN=pfkfb1 PE=4 SV=1	-1.86024	0.0170831	0.342105
F1QCD8	Hydroxyacid oxidase 2 (long chain) OS=Danio rerio OX=7955 GN=hao2 PE=1 SV=2	-1.10239	0.0420002	0.553191
E7FCQ0	CCHC-type zinc finger, nucleic acid-binding protein b OS=Danio rerio OX=7955 GN=cnbpb PE=1 SV=2	0.421645	0.0461963	0.554455
A0A0R4ISN6	Glutaryl-CoA dehydrogenase b (Fragment) OS=Danio rerio OX=7955 GN=gcdhb PE=1 SV=1	0.58643	0.0224041	0.397059
Q5RH26	ATP synthase subunit gamma OS=Danio rerio OX=7955 GN=atp5f1c PE=1 SV=1	0.617709	0.0278471	0.453947
Q1L9B0	Nuclear factor 1 OS=Danio rerio OX=7955 GN=nfia PE=3 SV=1	0.715675	0.020963	0.376923
Q9PVK4	L-lactate dehydrogenase B-A chain OS=Danio rerio OX=7955 GN=ldhba PE=2 SV=4	0.814002	0.0463269	0.554455
Q7T334	Malate dehydrogenase OS=Danio rerio OX=7955 GN=mdh2 PE=1 SV=1	0.833055	0.0474695	0.554455
Q6NYQ0	Tropomyosin 1 (Alpha) OS=Danio rerio OX=7955 GN=tpm1 PE=2 SV=1	0.837586	0.0385678	0.52973
Q6DHH8	Sulfotransferase OS=Danio rerio OX=7955 GN=sult1st6 PE=1 SV=1	0.948473	0.0454476	0.554455
F1QNB1	Ankyrin 3a OS=Danio rerio OX=7955 GN=ank3a PE=4 SV=2	0.972239	0.0175378	0.344828
Q7ZUD6	Reticulon OS=Danio rerio OX=7955 GN=rtn3 PE=1 SV=1	0.974861	0.0269873	0.433333
A5PL98	Succinate dehydrogenase [ubiquinone] iron-sulfur subunit, mitochondrial OS=Danio rerio OX=7955 GN=sdhb PE=2 SV=1	0.979899	0.00892821	0.2375
Q6DI22	Hydroxyacyl-CoA dehydrogenase OS=Danio rerio OX=7955 GN=hadh PE=1 SV=1	0.983292	0.00510109	0.2375
B0S751	Prostaglandin E synthase 2-like OS=Danio rerio OX=7955 GN=ptgesl PE=1 SV=1	1.00294	0.0236598	0.40411
Q7ZSZ0	RAB1A, member RAS oncogene family OS=Danio rerio OX=7955 GN=rab1ab PE=2 SV=1	1.02876	0.0385444	0.52973
Q08BI9	Calcium uniporter protein, mitochondrial OS=Danio rerio OX=7955 GN=mcu PE=1 SV=1	1.09531	0.0146379	0.326923
Q5XIZ6	Glycerol-3-phosphate dehydrogenase 1-like protein OS=Danio rerio OX=7955 GN=gpd1l PE=2 SV=1	1.10681	0.0337259	0.505952
E7F0Y1	C-type lectin domain family 3, member Bb OS=Danio rerio OX=7955 GN=clec3bb PE=4 SV=1	1.11996	0.0196001	0.370079
F1RDC7	Ubiquitin-specific peptidase 2b OS=Danio rerio OX=7955 GN=usp2b PE=3 SV=1	1.13531	0.0180103	0.352941
B8A6A1	Eukaryotic translation initiation factor 4E family member 1c OS=Danio rerio OX=7955 GN=eif4e1c PE=1 SV=1	1.14602	0.0167125	0.342105
A0A140LG13	Pyrroline-5-carboxylate reductase OS=Danio rerio OX=7955 GN=pycr1b PE=1 SV=1	1.20975	0.0233097	0.40411
F1R9Y9	Electron transfer flavoprotein subunit beta OS=Danio rerio OX=7955 GN=etfb PE=1 SV=1	1.24131	0.00672625	0.2375
Q3B747	MICOS complex subunit OS=Danio rerio OX=7955 GN=apooa PE=1 SV=1	1.2682	0.0132362	0.320388
F6P1A9	Ubiquitin thioesterase OS=Danio rerio OX=7955 GN=otub1b PE=1 SV=1	1.31227	0.0117575	0.288889
Q7ZZ04	Enoyl CoA hydratase, short chain, 1, mitochondrial OS=Danio rerio OX=7955 GN=echs1 PE=1 SV=1	1.31327	0.006589	0.2375
Q5RHZ6	Probable tRNA N6-adenosine threonylcarbamoyltransferase OS=Danio rerio OX=7955 GN=osgep PE=2 SV=1	1.32607	0.0133028	0.320388
F1REH8	Annexin OS=Danio rerio OX=7955 GN=anxa13 PE=1 SV=1	1.35654	0.012593	0.320388
Q6P2B0	VAMP (vesicle-associated membrane protein)-associated protein B and C OS=Danio rerio OX=7955 GN=vapb PE=1 SV=1	1.37417	0.0387484	0.52973
Q6P0T0	NADH dehydrogenase (Ubiquinone) Fe-S protein 8, (NADH-coenzyme Q reductase) OS=Danio rerio OX=7955 GN=ndufs8a PE=1 SV=1	1.38106	0.0301317	0.460123
Q7ZV96	60S ribosomal protein L10 OS=Danio rerio OX=7955 GN=rpl10 PE=2 SV=1	1.38459	0.0430732	0.554455
B8JIA7	Eukaryotic translation initiation factor 4eb OS=Danio rerio OX=7955 GN=eif4eb PE=1 SV=1	1.39528	0.0483752	0.557143
A0A2R8QFT7	ER membrane protein complex subunit 2 OS=Danio rerio OX=7955 GN=emc2 PE=1 SV=1	1.40061	0.00801394	0.2375
A0A2R8Q976	Dehydrogenase/reductase (SDR family) member 4 OS=Danio rerio OX=7955 GN=dhrs4 PE=1 SV=1	1.4345	0.0041854	0.2375
A0A2R8Q2R6	Protein canopy 4 OS=Danio rerio OX=7955 GN=cnpy4 PE=4 SV=1	1.44446	0.023355	0.40411
A0A2R8QGS9	Enoyl CoA hydratase 1, peroxisomal OS=Danio rerio OX=7955 GN=ech1 PE=1 SV=1	1.47489	0.00615512	0.2375
F1Q8C8	Interferon-inducible double-stranded RNA-dependent protein kinase activator A homolog OS=Danio rerio OX=7955 GN=prkra PE=1 SV=1	1.48344	0.0497012	0.557143
Q6NWJ2	Signal peptidase complex subunit 3 OS=Danio rerio OX=7955 GN=spcs3 PE=1 SV=1	1.4854	0.028278	0.460123
Q9PU58	Protein NipSnap homolog 2 OS=Danio rerio OX=7955 GN=nipsnap2 PE=2 SV=2	1.49018	0.0108073	0.288889
B1H1M3	Pyridoxal phosphate homeostasis protein OS=Danio rerio OX=7955 GN=plpbp PE=1 SV=1	1.49342	0.026258	0.418919
Q6NYF0	Endoribonuclease LACTB2 OS=Danio rerio OX=7955 GN=lactb2 PE=2 SV=1	1.49529	0.00379662	0.2375
Q6DGY8	Proteasome subunit alpha type OS=Danio rerio OX=7955 GN=psma6b PE=1 SV=1	1.50506	0.0343731	0.508876
F1QYM4	Eukaryotic translation initiation factor 4h OS=Danio rerio OX=7955 GN=eif4h PE=1 SV=2	1.51005	0.0394612	0.52973
F1QBS7	Sulfotransferase OS=Danio rerio OX=7955 GN=sult2st1 PE=3 SV=1	1.51067	0.00788224	0.2375
Q6PC69	60S ribosomal protein L10a OS=Danio rerio OX=7955 GN=rpl10a PE=2 SV=1	1.52382	0.00805948	0.2375
A7MCR1	Cytochrome b-c1 complex subunit Rieske, mitochondrial OS=Danio rerio OX=7955 GN=uqcrfs1 PE=1 SV=1	1.52613	0.0168214	0.342105
F1R300	Small nuclear ribonucleoprotein polypeptide A' OS=Danio rerio OX=7955 GN=snrpa1 PE=1 SV=1	1.52914	0.0212024	0.385185
A0A0R4ILD9	Eukaryotic translation initiation factor 2B, subunit 1 alpha OS=Danio rerio OX=7955 GN=eif2b1 PE=1 SV=1	1.53598	0.0312339	0.466667
A0A0G2KXZ1	Uncharacterized protein OS=Danio rerio OX=7955 GN=ddah1 PE=1 SV=2	1.55263	0.0185306	0.363636
Q6DHL5	Leucine-rich repeat-containing protein 57 OS=Danio rerio OX=7955 GN=lrrc57 PE=2 SV=1	1.55778	0.0143351	0.320388
Q7SYD0	Carbonyl reductase 1 OS=Danio rerio OX=7955 GN=cbr1 PE=1 SV=1	1.58468	0.0383919	0.52973
Q6PC80	Ribosomal protein S5 OS=Danio rerio OX=7955 GN=rps5 PE=1 SV=1	1.58749	0.0182676	0.363636
Q7ZW20	Tyrosine 3-monooxygenase/tryptophan 5-monooxygenase activation protein, epsilon polypeptide 1 OS=Danio rerio OX=7955 GN=ywhae1 PE=1 SV=1	1.5914	0.00617843	0.2375
R4GEX4	Eukaryotic translation initiation factor 3, subunit F (Fragment) OS=Danio rerio OX=7955 GN=eif3f PE=1 SV=1	1.59448	0.00760272	0.2375
A9C3P0	Malectin OS=Danio rerio OX=7955 GN=mlec PE=3 SV=1	1.5947	0.0473598	0.554455
Q6IQQ0	Ribosomal protein L21 OS=Danio rerio OX=7955 GN=rpl21 PE=1 SV=1	1.61172	0.018873	0.368852
Q6TLE5	Family with sequence similarity 49, member Ba OS=Danio rerio OX=7955 GN=fam49ba PE=1 SV=1	1.62956	0.0176663	0.350427
Q08C33	Isochorismatase domain-containing protein 1 OS=Danio rerio OX=7955 GN=isoc1 PE=2 SV=1	1.63138	0.0215889	0.385185
Q7ZV49	Hypoxanthine phosphoribosyltransferase OS=Danio rerio OX=7955 GN=hprt1 PE=1 SV=1	1.64092	0.0108734	0.288889
Q1LXS2	Proteasome assembly chaperone 2 OS=Danio rerio OX=7955 GN=psmg2 PE=2 SV=1	1.65736	0.0294214	0.460123
F1QTP7	Myozenin 3a OS=Danio rerio OX=7955 GN=myoz3a PE=4 SV=2	1.6851	0.0226367	0.40411
A0A2R8Q6P3	Uncharacterized protein OS=Danio rerio OX=7955 PE=4 SV=1	1.69533	0.0382144	0.52973
B0S641	Protein O-fucosyltransferase 2 OS=Danio rerio OX=7955 GN=pofut2 PE=1 SV=1	1.7005	0.0102629	0.27381
A0A0R4IUV0	DNA topoisomerase I mitochondrial OS=Danio rerio OX=7955 GN=top1mt PE=1 SV=2	1.71082	0.00865131	0.2375
B8A4H6	Phosphoglycerate mutase OS=Danio rerio OX=7955 GN=pgam1b PE=3 SV=1	1.74408	0.0126163	0.320388
Q6IQH4	Proteasome 26S subunit, non-ATPase 8 OS=Danio rerio OX=7955 GN=psmd8 PE=1 SV=1	1.75281	0.0252155	0.40411
Q6NWL4	CCR4-NOT transcription complex subunit 9 OS=Danio rerio OX=7955 GN=cnot9 PE=2 SV=1	1.77269	0.00532102	0.2375
Q7ZTT4	Chloride intracellular channel 4 OS=Danio rerio OX=7955 GN=clic4 PE=1 SV=1	1.78434	0.0449493	0.554455
Q5PRD0	14-3-3 protein beta/alpha-A OS=Danio rerio OX=7955 GN=ywhaba PE=2 SV=2	1.81961	0.00601863	0.2375
A8WHX1	Armadillo repeat-containing protein 8 OS=Danio rerio OX=7955 GN=armc8 PE=1 SV=1	1.82376	0.0121235	0.304348
Q6NXA5	Paraoxonase 2 OS=Danio rerio OX=7955 GN=pon2 PE=1 SV=1	1.83738	0.00727451	0.2375
F1Q7G0	Collagen triple helix repeat-containing 1a OS=Danio rerio OX=7955 GN=cthrc1a PE=4 SV=2	1.83969	0.0297442	0.460123
F1QX93	Enoyl-CoA delta isomerase 1 (Fragment) OS=Danio rerio OX=7955 GN=eci1 PE=1 SV=1	1.84414	0.00338039	0.2375
A8WGM1	VAMP (vesicle-associated membrane protein)-associated protein A,-like OS=Danio rerio OX=7955 GN=vapal PE=1 SV=1	1.87721	0.00459619	0.2375
A0A0R4IRJ8	Chloride intracellular channel protein OS=Danio rerio OX=7955 GN=clic1 PE=1 SV=1	1.87761	0.0192148	0.370079
Q5BKV9	Ribosomal protein L9 OS=Danio rerio OX=7955 GN=rpl9 PE=1 SV=1	1.87805	0.0136912	0.320388
A0A0R4IKD0	Ras suppressor protein 1 OS=Danio rerio OX=7955 GN=rsu1 PE=1 SV=2	1.88384	0.00541176	0.2375
F1QSP8	Peroxiredoxin 4 OS=Danio rerio OX=7955 GN=prdx4 PE=1 SV=1	1.92495	0.00518682	0.2375
Q5XJS8	Hsd17b10 protein OS=Danio rerio OX=7955 GN=hsd17b10 PE=1 SV=1	1.93985	0.00705142	0.2375
F1QW92	Si:ch211-210c8.6 OS=Danio rerio OX=7955 GN=si:ch211-210c8.6 PE=1 SV=1	1.9458	0.034631	0.511765
Q6P102	Tyrosine 3-monooxygenase/tryptophan 5-monooxygenase activation protein, beta polypeptide-like OS=Danio rerio OX=7955 GN=ywhabl PE=1 SV=1	1.94849	0.00604194	0.2375
Q6P5M3	Ribosomal protein S9 OS=Danio rerio OX=7955 GN=rps9 PE=1 SV=1	1.95088	0.0239649	0.40411
Q7SXN6	Proteasome subunit alpha type OS=Danio rerio OX=7955 GN=psma6a PE=1 SV=1	1.96253	0.0200981	0.375
Q9PTP1	Proliferating cell nuclear antigen OS=Danio rerio OX=7955 GN=pcna PE=1 SV=2	1.9806	0.0192381	0.370079
Q8JFW7	B cell receptor-associated protein 31 OS=Danio rerio OX=7955 GN=bcap31 PE=1 SV=1	2.00149	0.0172122	0.344828
Q9MIY7	Cytochrome c oxidase subunit 2 OS=Danio rerio OX=7955 GN=mt-co2 PE=3 SV=1	2.00152	0.0248064	0.40411
Q6GMI7	Enolase-phosphatase E1 OS=Danio rerio OX=7955 GN=enoph1 PE=2 SV=1	2.02328	0.00375327	0.2375
F1R442	Arachidonate 5-lipoxygenase b, tandem duplicate 3 OS=Danio rerio OX=7955 GN=alox5b.3 PE=1 SV=1	2.03032	0.0370307	0.52973
Q561X2	Tmed9 protein OS=Danio rerio OX=7955 GN=tmed9 PE=1 SV=1	2.04714	0.0354034	0.520468
E9QBZ7	CD248 molecule, endosialin b OS=Danio rerio OX=7955 GN=cd248b PE=4 SV=1	2.05034	0.0189387	0.370079
F1QYJ6	Sulfotransferase 6B1 OS=Danio rerio OX=7955 GN=sult6b1 PE=1 SV=1	2.08287	0.00895153	0.2375
A0A0G2KLD8	Biphenyl hydrolase like OS=Danio rerio OX=7955 GN=bphl PE=1 SV=1	2.08841	0.00346852	0.2375
A0A2U3TWB2	MICOS complex subunit OS=Danio rerio OX=7955 GN=chchd6a PE=1 SV=1	2.09274	0.00523214	0.2375
F1QGP8	High mobility group box 3a OS=Danio rerio OX=7955 GN=hmgb3a PE=4 SV=1	2.1024	0.0253268	0.40411
Q6PH75	Cathepsin B OS=Danio rerio OX=7955 GN=ctsba PE=1 SV=1	2.11182	0.0107416	0.288889
A0A2R8PXL7	Carboxypeptidase OS=Danio rerio OX=7955 GN=scpep1 PE=3 SV=1	2.13929	0.0160406	0.333333
Q7ZUM0	Tyrosine 3-monooxygenase/tryptophan 5-monooxygenase activation protein, theta polypeptide a OS=Danio rerio OX=7955 GN=ywhaqa PE=1 SV=1	2.15284	0.00383998	0.2375
Q1LVZ0	RAB11B, member RAS oncogene family, a OS=Danio rerio OX=7955 GN=rab11ba PE=1 SV=1	2.166	0.0464146	0.554455
B8JLJ3	Tyrosine 3-monooxygenase/tryptophan 5-monooxygenase activation protein, zeta polypeptide OS=Danio rerio OX=7955 GN=ywhaz PE=1 SV=1	2.17026	0.0125269	0.320388
F1QMG9	Si:dkey-21e2.8 (Fragment) OS=Danio rerio OX=7955 GN=si:dkey-21e2.8 PE=3 SV=1	2.21014	0.0133261	0.320388
Q6GQM3	Proteasome subunit alpha type OS=Danio rerio OX=7955 GN=psma6l PE=1 SV=1	2.22454	0.0287107	0.460123
Q9DGK4	Translationally-controlled tumor protein homolog OS=Danio rerio OX=7955 GN=tpt1 PE=2 SV=1	2.22475	0.0234427	0.40411
A0A2R8Q8M1	Peroxiredoxin 6 OS=Danio rerio OX=7955 GN=prdx6 PE=1 SV=1	2.22686	0.0119096	0.296703
Q4V918	Proteasome subunit alpha type OS=Danio rerio OX=7955 GN=psma3 PE=1 SV=1	2.23621	0.00552331	0.2375
Q7ZVP2	RAB5C, member RAS oncogene family OS=Danio rerio OX=7955 GN=rab5c PE=1 SV=1	2.26673	0.0269639	0.433333
F1RBF6	14-3-3 protein beta/alpha-B OS=Danio rerio OX=7955 GN=ywhabb PE=1 SV=1	2.29184	0.00366536	0.2375
A0A0R4IRN5	Si:ch211-222l21.1 OS=Danio rerio OX=7955 GN=si:ch211-222l21.1 PE=1 SV=1	2.31117	0.0132795	0.320388
Q6PBW8	Lysophospholipase II OS=Danio rerio OX=7955 GN=lypla2 PE=1 SV=1	2.34442	0.00747386	0.2375
Q6P963	Hydroxyacylglutathione hydrolase, mitochondrial OS=Danio rerio OX=7955 GN=hagh PE=2 SV=2	2.34874	0.0154478	0.333333
Q803M8	Tryosine 3-monooxygenase/tryptophan 5-monooxygenase activation protein, zeta polypeptide OS=Danio rerio OX=7955 GN=ywhaqb PE=1 SV=1	2.35029	0.00716275	0.2375
Q1LYQ0	Novel protein OS=Danio rerio OX=7955 GN=CH211-31O18.2-001 PE=1 SV=1	2.37241	0.00303115	0.2375
A0A0F6PK88	Adenylate kinase 2, mitochondrial OS=Danio rerio OX=7955 GN=ak2 PE=1 SV=1	2.40157	0.0110874	0.288889
F1QN63	Glutathione S-transferase, alpha tandem duplicate 2 OS=Danio rerio OX=7955 GN=gsta.2 PE=1 SV=1	2.41562	0.00729782	0.2375
A8DZJ0	Tubulin folding cofactor B OS=Danio rerio OX=7955 GN=tbcb PE=1 SV=1	2.42248	0.0054573	0.2375
F1RCM3	Proteasome subunit beta OS=Danio rerio OX=7955 GN=psmb6 PE=1 SV=1	2.43434	0.0303041	0.460123
Q92051	Carbonic anhydrase OS=Danio rerio OX=7955 GN=cahz PE=1 SV=2	2.4404	0.00613181	0.2375
Q6DG91	Proteasome assembly chaperone 1 OS=Danio rerio OX=7955 GN=psmg1 PE=2 SV=1	2.46113	0.00897484	0.2375
Q6P5J7	Chloride intracellular channel 3 OS=Danio rerio OX=7955 GN=clic3 PE=1 SV=1	2.48356	0.044926	0.554455
X1WFI9	High mobility group box 1b OS=Danio rerio OX=7955 GN=hmgb1b PE=1 SV=1	2.4927	0.00670294	0.2375
A5PN62	Dimethylarginine dimethylaminohydrolase 2 OS=Danio rerio OX=7955 GN=ddah2 PE=1 SV=1	2.52726	0.00661231	0.2375
A2BHS1	Heat shock protein b8 OS=Danio rerio OX=7955 GN=hspb8 PE=1 SV=1	2.52857	0.0452737	0.554455
Q9PT95	Retinol binding protein OS=Danio rerio OX=7955 GN=rbp4 PE=1 SV=1	2.5371	0.00656569	0.2375
A0A2R8QM09	Uncharacterized protein OS=Danio rerio OX=7955 GN=abhd10b PE=4 SV=1	2.55266	0.0144874	0.320388
Q504C0	Ubiquitin carboxyl-terminal hydrolase OS=Danio rerio OX=7955 GN=uchl3 PE=1 SV=1	2.57572	0.028452	0.460123
Q1L8L9	Adenylate kinase 2, mitochondrial OS=Danio rerio OX=7955 GN=ak2 PE=2 SV=1	2.57725	0.021763	0.385185
A0A0R4IXF5	Zgc:92161 OS=Danio rerio OX=7955 GN=zgc:92161 PE=1 SV=1	2.58686	0.0330768	0.502994
Q503V2	Apolipoprotein Ea OS=Danio rerio OX=7955 GN=apoea PE=2 SV=1	2.60187	0.00916667	0.246914
Q66IB6	High mobility group box 2b OS=Danio rerio OX=7955 GN=hmgb2b PE=1 SV=1	2.60431	0.00845207	0.2375
A0A2R8Q5W8	Elongation factor Ts, mitochondrial OS=Danio rerio OX=7955 GN=TSFM PE=1 SV=1	2.61835	0.021159	0.381679
Q6ZM19	Eukaryotic translation initiation factor 6 OS=Danio rerio OX=7955 GN=eif6 PE=2 SV=1	2.62279	0.00492734	0.2375
F1QWX4	Sepiapterin reductase a OS=Danio rerio OX=7955 GN=spra PE=1 SV=1	2.62917	0.00734314	0.2375
Q504A5	Probable thiopurine S-methyltransferase OS=Danio rerio OX=7955 GN=tpmt PE=2 SV=1	2.7038	0.0124816	0.320388
F1Q5N4	Proteasome subunit beta OS=Danio rerio OX=7955 GN=psmb7 PE=1 SV=1	2.74029	0.0116698	0.288889
Q1L907	Glutathione S-transferase rho OS=Danio rerio OX=7955 GN=gstr PE=1 SV=1	2.82237	0.00571765	0.2375
F1QBQ6	Zgc:56585 OS=Danio rerio OX=7955 GN=zgc:56585 PE=1 SV=1	2.82413	0.0166005	0.342105
F6NM27	Runt-related transcription factor OS=Danio rerio OX=7955 GN=runx3 PE=4 SV=1	2.83769	0.0304126	0.460123
A0A0R4IDS0	Apolipoprotein A-IV a (Fragment) OS=Danio rerio OX=7955 GN=apoa4a PE=3 SV=1	2.86025	0.0231132	0.40411
Q7ZUH1	RNA transcription, translation and transport factor protein OS=Danio rerio OX=7955 GN=rtraf PE=2 SV=1	2.88461	0.00351405	0.2375
Q7T3C6	Cleavage and polyadenylation specificity factor subunit 5 OS=Danio rerio OX=7955 GN=nudt21 PE=2 SV=1	2.89342	0.0158216	0.333333
Q7T3G2	Tyrosine 3-monooxygenase/tryptophan 5-monooxygenase activation protein, eta polypeptide OS=Danio rerio OX=7955 GN=ywhah PE=1 SV=1	2.89745	0.0305005	0.460123
F1QHR0	Apolipoprotein A-IV b, tandem duplicate 1 OS=Danio rerio OX=7955 GN=apoa4b.1 PE=1 SV=1	2.92611	0.0278704	0.453947
B8JIS8	Glutathione S-transferase mu, tandem duplicate 1 OS=Danio rerio OX=7955 GN=gstm.1 PE=3 SV=1	2.965	0.037312	0.52973
Q6NX86	High mobility group box 1a OS=Danio rerio OX=7955 GN=hmgb1a PE=1 SV=1	2.96717	0.00972298	0.26506
A0A286Y9X1	Golgi brefeldin A-resistant guanine nucleotide exchange factor 1 OS=Danio rerio OX=7955 GN=gbf1 PE=1 SV=2	2.98918	0.0164475	0.342105
O42363	Apolipoprotein A-I OS=Danio rerio OX=7955 GN=apoa1 PE=2 SV=1	3.01707	0.00483802	0.2375
Q5U3G0	Progesterone receptor membrane component 1 OS=Danio rerio OX=7955 GN=pgrmc1 PE=1 SV=1	3.01767	0.00431492	0.2375
Q6P5M2	WD repeat-containing protein 61 OS=Danio rerio OX=7955 GN=wdr61 PE=2 SV=1	3.03564	0.00663562	0.2375
B3DHC5	Apolipoprotein A-IV b, tandem duplicate 2 OS=Danio rerio OX=7955 GN=apoa4b.2 PE=1 SV=1	3.05688	0.0057817	0.2375
Q6TGV6	Proteasome subunit alpha type OS=Danio rerio OX=7955 GN=psma5 PE=1 SV=1	3.0644	0.0154931	0.333333
A0A0R4IKF0	Apolipoprotein A-Ib OS=Danio rerio OX=7955 GN=apoa1b PE=1 SV=1	3.07245	0.0191511	0.370079
A7MBU9	Carboxymethylenebutenolidase homolog (Pseudomonas) OS=Danio rerio OX=7955 GN=cmbl PE=1 SV=1	3.10044	0.0084976	0.2375
A7YT77	Qdpra protein OS=Danio rerio OX=7955 GN=qdpra PE=1 SV=1	3.16079	0.0356167	0.526012
E7EZ94	Glutathione S-transferase theta 1a OS=Danio rerio OX=7955 GN=gstt1a PE=1 SV=1	3.16419	0.0068988	0.2375
A4VAK4	Heat shock protein 1 OS=Danio rerio OX=7955 GN=hspb1 PE=1 SV=1	3.18812	0.00783856	0.2375
B0R0K9	Si:ch211-103n10.5 OS=Danio rerio OX=7955 GN=si:ch211-103n10.5 PE=1 SV=1	3.19882	0.00444216	0.2375
F1RA44	Si:zfos-2330d3.1 OS=Danio rerio OX=7955 GN=si:zfos-2330d3.1 PE=4 SV=2	3.22366	0.00529771	0.2375
E7FEJ4	Vitelline membrane outer layer 1 homolog a OS=Danio rerio OX=7955 GN=vmo1a PE=4 SV=1	3.24939	0.0089049	0.2375
A8E7N8	Proteasome subunit beta OS=Danio rerio OX=7955 GN=psmb4 PE=1 SV=1	3.26392	0.00589139	0.2375
Q7ZUW5	RAB5A, member RAS oncogene family OS=Danio rerio OX=7955 GN=rab5aa PE=1 SV=1	3.36871	0.0165552	0.342105
F8W539	Wu:fj11g02 OS=Danio rerio OX=7955 GN=wu:fj11g02 PE=4 SV=1	3.61256	0.00817081	0.2375
Q6DGL3	Glutathione S-transferase zeta 1 OS=Danio rerio OX=7955 GN=gstz1 PE=1 SV=1	3.73517	0.0292681	0.460123
Q6NUY0	Adenylate kinase 4, mitochondrial OS=Danio rerio OX=7955 GN=ak4 PE=1 SV=1	4.36756	0.0218698	0.385185
Q7T2J4	Alcohol dehydrogenase 8b OS=Danio rerio OX=7955 GN=adh8b PE=1 SV=1	4.50059	0.0097902	0.26506
A0A0G2KSF3	Uncharacterized protein OS=Danio rerio OX=7955 GN=LOC103911589 PE=4 SV=1	10.5332	0.0434939	0.554455
F1RDN0	RNA-binding protein PNO1 OS=Danio rerio OX=7955 GN=pno1 PE=1 SV=1	10.9586	0.0454035	0.554455
F1QJW5	Haloacid dehalogenase-like hydrolase domain-containing protein 2 OS=Danio rerio OX=7955 GN=hdhd2 PE=1 SV=2	11.2676	0.0434486	0.554455
F1QNF2	Chromobox homolog 3a (HP1 gamma homolog, Drosophila) OS=Danio rerio OX=7955 GN=cbx3a PE=1 SV=2	11.2683	0.039613	0.532258
Q5XJS4	RAB34, member RAS oncogene family OS=Danio rerio OX=7955 GN=rab34a PE=2 SV=1	11.3401	0.0381487	0.52973
F1REW2	Cytosolic Fe-S cluster assembly factor nubp2 OS=Danio rerio OX=7955 GN=nubp2 PE=1 SV=1	11.4122	0.0387251	0.52973
A8E7S8	Mortality factor 4-like 1 OS=Danio rerio OX=7955 GN=morf4l1 PE=1 SV=1	11.4686	0.0260639	0.408163
A0A0R4IXD6	Elastase 2 OS=Danio rerio OX=7955 GN=ela2 PE=1 SV=1	11.4941	0.0426654	0.554455
F1R4G6	Cathepsin H OS=Danio rerio OX=7955 GN=ctsh PE=1 SV=1	11.6351	0.0496135	0.557143
F1RDT4	ATPase H+-transporting V1 subunit E1a OS=Danio rerio OX=7955 GN=atp6v1e1a PE=1 SV=1	11.7558	0.0298103	0.460123
X1WD20	Si:dkey-78l4.2 OS=Danio rerio OX=7955 GN=si:dkey-78l4.2 PE=3 SV=3	11.7672	0.0489235	0.557143
B0S5X0	Epiphycan OS=Danio rerio OX=7955 GN=epyc PE=1 SV=1	11.7895	0.0358539	0.526012
Q1LUQ5	Si:dkey-21e2.16 OS=Danio rerio OX=7955 GN=si:dkey-21e2.16 PE=3 SV=1	12.2362	0.0309101	0.463415
Q7ZSY6	Metallothionein-2 OS=Danio rerio OX=7955 GN=mt2 PE=2 SV=1	12.3605	0.00159913	0.2375
F1QQK5	Nudix (nucleoside diphosphate-linked moiety X)-type motif 22 OS=Danio rerio OX=7955 GN=nudt22 PE=4 SV=1	13.4837	0.000353268	0.2
A8Y5U1	UPF0600 protein C5orf51 homolog OS=Danio rerio OX=7955 GN=si:dkey-46a10.3 PE=2 SV=1	14.9209	0.000306645	0.2
F1QTI1	Chloride intracellular channel protein OS=Danio rerio OX=7955 GN=clic2 PE=1 SV=1	15.3675	0.00162244	0.2375
Q5TYS5	Secernin-2 OS=Danio rerio OX=7955 GN=scrn2 PE=2 SV=1	15.5217	0.0019573	0.2375
E7FAI0	Uncharacterized protein OS=Danio rerio OX=7955 PE=4 SV=3	15.7913	0.000660458	0.2375
Q6NWK4	ATPase H+-transporting V1 subunit E1b OS=Danio rerio OX=7955 GN=atp6v1e1b PE=1 SV=1	15.9625	0.00124978	0.2375
A0A140LGT1	Core-binding factor subunit beta OS=Danio rerio OX=7955 GN=cbfb PE=4 SV=1	16.4128	0.00252418	0.2375
A4UU31	MAP kinase kinase 4B OS=Danio rerio OX=7955 GN=map2k4b PE=1 SV=1	16.4331	0.000109913	0
A0A0R4IRK6	Exosome component 3 OS=Danio rerio OX=7955 GN=exosc3 PE=1 SV=1	16.515	0.000749673	0.2375
X1WDH8	Histone H2B OS=Danio rerio OX=7955 GN=si:dkey-261m9.19 PE=1 SV=1	16.5927	0.00193399	0.2375
F1QK92	Ubiquinol-cytochrome c reductase complex assembly factor 1 OS=Danio rerio OX=7955 GN=uqcc1 PE=1 SV=1	16.7216	0.00175719	0.2375
A0A2R8QPH1	Eukaryotic translation initiation factor 1A X-linked b OS=Danio rerio OX=7955 GN=eif1axb PE=1 SV=1	16.748	0.00207059	0.2375
Q7T337	Fructose-1,6-bisphosphatase 1b OS=Danio rerio OX=7955 GN=fbp1b PE=1 SV=1	16.7984	0.00188736	0.2375
Q5XJ34	BTB/POZ domain-containing protein kctd15-like OS=Danio rerio OX=7955 GN=kctd15l PE=1 SV=1	16.9404	0.00182168	0.2375
F1R4S7	GTP:AMP phosphotransferase AK3, mitochondrial OS=Danio rerio OX=7955 GN=ak3 PE=1 SV=1	16.9889	0.00120447	0.2375
A8KBR8	Glutathione S-transferase mu tandem duplicate 2 OS=Danio rerio OX=7955 GN=gstm.2 PE=1 SV=1	17.3707	0.00100708	0.2375
F8W4J1	Serine protease 59, tandem duplicate 2 (Fragment) OS=Danio rerio OX=7955 GN=prss59.2 PE=1 SV=2	17.7973	0.000861438	0.2375
A0JMQ8	Zgc:154169 OS=Danio rerio OX=7955 GN=zgc:154169 PE=1 SV=1	17.9554	8.66013e-05	0
F1R6R2	Si:ch211-270n8.1 (Fragment) OS=Danio rerio OX=7955 GN=si:ch211-270n8.1 PE=1 SV=1	18.8377	0.00274793	0.2375
