# Supplementary material for: Dysregulated heparan sulfate proteoglycan metabolism promotes Ewing sarcoma tumor growth
Source: eLife. 2022 Mar 14;11:e69734. doi: 10.7554/eLife.69734 (PMC8942468; doi:10.7554/eLife.69734)
Supplement: Supplementary file 3. [file elife-69734-supp3.xlsx]

## Sheet: Dowregulated, pval<0.05
Supplemental Table 2. List of downregulated and upregulated proteins identified by LC-MS/MS analysis in EWSR1-FLI1 expressing embryos, p < 0.05
ID	Ensembl_gene_id	external_gene_name	description	Log2FC	pval
F1QT01	ENSDARG00000068507	crybb1	crystallin, beta B1 [Source:ZFIN;Acc:ZDB-GENE-010813-1]	-17.838	0.000539093
F1R5R0	ENSDARG00000032206	cthl	cystathionase (cystathionine gamma-lyase), like [Source:ZFIN;Acc:ZDB-GENE-040905-3]	-16.7289	0.00119371
F1R6N3	ENSDARG00000013335	anxa6	annexin A6 [Source:ZFIN;Acc:ZDB-GENE-030707-3]	-16.1249	0.000154027
F1RB94	ENSDARG00000015325	u2af1	U2 small nuclear RNA auxiliary factor 1 [Source:ZFIN;Acc:ZDB-GENE-020419-1]	-15.5921	0.000192533
A0A0R4IGM0	ENSDARG00000102453	slc1a2b	solute carrier family 1 member 2b [Source:ZFIN;Acc:ZDB-GENE-030131-7779]	-15.3015	0.000731626
F1QXF4	ENSDARG00000037503	thoc2	THO complex 2 [Source:ZFIN;Acc:ZDB-GENE-030616-54]	-15.294	0.00046208
Q1L8R2	ENSDARG00000011564	sfpq	splicing factor proline/glutamine-rich [Source:ZFIN;Acc:ZDB-GENE-040426-2452]	-15.2327	0.000269547
F1QYZ6	ENSDARG00000051939	pcxb	pyruvate carboxylase b [Source:ZFIN;Acc:ZDB-GENE-000831-1]	-15.1645	0.000500586
F1Q7H6	ENSDARG00000055076	nxf1	nuclear RNA export factor 1 [Source:ZFIN;Acc:ZDB-GENE-030131-2585]	-15.0924	0.000385066
F1R2G5	ENSDARG00000038876		zgc:101569 [Source:ZFIN;Acc:ZDB-GENE-041010-72]	-15.0443	0.0005776
Q8JH70	ENSDARG00000019702	aldocb	aldolase C, fructose-bisphosphate, b [Source:NCBI gene;Acc:369193]	-15.0437	0.000308053
A0A0R4IKN8	ENSDARG00000103856	ptcd3	pentatricopeptide repeat domain 3 [Source:NCBI gene;Acc:553325]	-14.8355	0.000885653
Q5TYY5	ENSDARG00000006215	akr1b1.1	aldo-keto reductase family 1, member B1 (aldose reductase), tandem duplicate 1 [Source:ZFIN;Acc:ZDB-GENE-040625-7]	-14.7525	0.000423573
F1QD61	ENSDARG00000013457	mtrex	Mtr4 exosome RNA helicase [Source:ZFIN;Acc:ZDB-GENE-040426-2854]	-14.6288	0.00169429
F1QKH2	ENSDARG00000025703	dmgdh	dimethylglycine dehydrogenase [Source:ZFIN;Acc:ZDB-GENE-080227-8]	-14.5903	0.000616106
A3QK16	ENSDARG00000086523	ch25hl3	cholesterol 25-hydroxylase like 3 [Source:ZFIN;Acc:ZDB-GENE-180119-1]	-14.5602	0.00281098
Q32PS5	ENSDARG00000010021	grpel1	GrpE-like 1, mitochondrial [Source:ZFIN;Acc:ZDB-GENE-051120-111]	-14.4759	0.00415872
F1RA03	ENSDARG00000068589	vimr1	vimentin-related 1 [Source:ZFIN;Acc:ZDB-GENE-130530-722]	-14.3082	0.00157877
A2BF91	ENSDARG00000035129		zgc:101858 [Source:ZFIN;Acc:ZDB-GENE-040927-13]	-14.2981	0.00204085
A0A0R4IFK9	ENSDARG00000102607	pmpca	peptidase (mitochondrial processing) alpha [Source:ZFIN;Acc:ZDB-GENE-030131-5809]	-14.2861	0.00146325
Q6IQH4	ENSDARG00000020454	psmd8	proteasome 26S subunit, non-ATPase 8 [Source:ZFIN;Acc:ZDB-GENE-040625-136]	-14.2116	0.00257995
A0A0R4IS22	ENSDARG00000099519	cpdp	CPD photolyase [Source:ZFIN;Acc:ZDB-GENE-040426-1644]	-14.2002	0.000654613
E7F8W7	ENSDARG00000056128	fastkd1	FAST kinase domains 1 [Source:ZFIN;Acc:ZDB-GENE-040426-1833]	-14.019	0.00304202
A0A1L1QZU5	ENSDARG00000011615	mybpc3	myosin binding protein C, cardiac [Source:ZFIN;Acc:ZDB-GENE-070112-2362]	-13.9859	0.000962666
A5PMZ3	ENSDARG00000058348	scinlb	scinderin like b [Source:ZFIN;Acc:ZDB-GENE-040426-2068]	-13.9524	0.00196384
A0A0R4I9E5	ENSDARG00000042030	kpna5	karyopherin alpha 5 (importin alpha 6) [Source:NCBI gene;Acc:553205]	-13.9395	0.00100117
Q7SZE5	ENSDARG00000104230	sec23a	Sec23 homolog A, coat complex II component [Source:NCBI gene;Acc:406774]	-13.9211	0.00454378
A0A2R8RVR3	ENSDARG00000001241	puf60b	poly-U binding splicing factor b [Source:NCBI gene;Acc:415211]	-13.8885	0.00223339
H2ZRH9	ENSDARG00000021808	nmt2	N-myristoyltransferase 2 [Source:NCBI gene;Acc:556483]	-13.8449	0.00746619
Q7ZVG7	ENSDARG00000037281	fgg	fibrinogen gamma chain [Source:ZFIN;Acc:ZDB-GENE-040426-1998]	-13.7649	0.00154027
A5PN62	ENSDARG00000105009	ddah2	dimethylarginine dimethylaminohydrolase 2 [Source:ZFIN;Acc:ZDB-GENE-030131-913]	-13.7089	0.00134773
A0A2R8Q8Y9	ENSDARG00000103900	sept9b	septin 9b [Source:ZFIN;Acc:ZDB-GENE-050327-17]	-13.679	0.00069312
F1R314	ENSDARG00000058479		zgc:110425 [Source:ZFIN;Acc:ZDB-GENE-050522-103]	-13.653	0.0017328
A0A0R4IK45	ENSDARG00000055715	capn8	calpain 8 [Source:ZFIN;Acc:ZDB-GENE-050522-279]	-13.6378	0.000770133
B3DJR5	ENSDARG00000042484	tle2a	TLE family member 2, transcriptional corepressor a [Source:ZFIN;Acc:ZDB-GENE-030131-2826]	-13.6302	0.000847146
A0A140LGX4	ENSDARG00000022101	obscnb	obscurin, cytoskeletal calmodulin and titin-interacting RhoGEF b [Source:ZFIN;Acc:ZDB-GENE-070119-5]	-13.5844	0.00080864
A0A0R4ILL7	ENSDARG00000099517	adss1	adenylosuccinate synthase 1 [Source:NCBI gene;Acc:407989]	-13.5836	0.00515989
A0A0R4IVW4	ENSDARG00000019081	DHDH	zgc:101723 [Source:NCBI gene;Acc:449558]	-13.5265	0.0011552
Q1JPX3	ENSDARG00000098825	farsa	phenylalanyl-tRNA synthetase subunit alpha [Source:NCBI gene;Acc:692329]	-13.4882	0.00392768
F1QTT5	ENSDARG00000009443	zgc:92137	zgc:92137 [Source:ZFIN;Acc:ZDB-GENE-040801-179]	-13.4595	0.00138624
A0A0R4IYB7	ENSDARG00000075446	naa25	N(alpha)-acetyltransferase 25, NatB auxiliary subunit [Source:ZFIN;Acc:ZDB-GENE-041111-190]	-13.4534	0.0029265
A0JML7	ENSDARG00000063525	adpgk	ADP-dependent glucokinase [Source:ZFIN;Acc:ZDB-GENE-061103-421]	-13.363	0.00103968
Q7SYD5	ENSDARG00000021082	sec31a	SEC31 homolog A, COPII coat complex component [Source:NCBI gene;Acc:266638]	-13.3536	0.000924159
F1RDQ9	ENSDARG00000043081	ctsz	cathepsin Z [Source:ZFIN;Acc:ZDB-GENE-041010-139]	-13.2765	0.00165579
A0A2R8RN74	ENSDARG00000116634	crygm2d7	crystallin, gamma M2d7 [Source:ZFIN;Acc:ZDB-GENE-060918-5]	-13.2762	0.00342709
A0A2R8QAN0	ENSDARG00000113621	rpe65b	retinoid isomerohydrolase RPE65 b [Source:NCBI gene;Acc:100002865]	-13.2735	0.00130923
A0A2R8RWA3	ENSDARG00000042368	kif26aa	kinesin family member 26Aa [Source:ZFIN;Acc:ZDB-GENE-041001-148]	-13.2366	0.00546794
F1R1A8	ENSDARG00000070157	tgm2a	transglutaminase 2, C polypeptide A [Source:ZFIN;Acc:ZDB-GENE-040912-78]	-13.222	0.00123221
E7F350	ENSDARG00000033259	dis3l2	DIS3 like 3'-5' exoribonuclease 2 [Source:ZFIN;Acc:ZDB-GENE-070705-171]	-13.1856	0.00111669
E7FCX4	ENSDARG00000007744	tsr1	TSR1 ribosome maturation factor [Source:ZFIN;Acc:ZDB-GENE-030131-3762]	-13.1776	0.00446677
F1Q694	ENSDARG00000018650	gtpbp3	GTP binding protein 3, mitochondrial [Source:NCBI gene;Acc:553807]	-13.1208	0.00107819
E7F2R1	ENSDARG00000074314	ttc37	tetratricopeptide repeat domain 37 [Source:ZFIN;Acc:ZDB-GENE-110125-2]	-13.0779	0.00177131
X1WDQ5	ENSDARG00000017294	gnai2b	guanine nucleotide binding protein (G protein), alpha inhibiting activity polypeptide 2b [Source:ZFIN;Acc:ZDB-GENE-030131-5861]	-13.0656	0.00200235
Q6P5I8	ENSDARG00000007279	yipf5	Yip1 domain family, member 5 [Source:NCBI gene;Acc:393265]	-13.0589	0.00265696
F1QB47	ENSDARG00000016548	eif5b	eukaryotic translation initiation factor 5B [Source:ZFIN;Acc:ZDB-GENE-050208-20]	-13.0588	0.00658522
Q1RLX4	ENSDARG00000004726	trappc11	trafficking protein particle complex 11 [Source:NCBI gene;Acc:323003]	-13.0288	0.00581528
Q7T394	ENSDARG00000032013	pafah1b1a	platelet-activating factor acetylhydrolase 1b, regulatory subunit 1a [Source:NCBI gene;Acc:394246]	-12.9939	0.00127072
Q6PC06	ENSDARG00000039343	ahcyl2b	adenosylhomocysteinase like 2b [Source:ZFIN;Acc:ZDB-GENE-040115-5]	-12.9489	0.00180981
A0A2R8QPC9	ENSDARG00000044753	idh3b	isocitrate dehydrogenase (NAD(+)) 3 non-catalytic subunit beta [Source:ZFIN;Acc:ZDB-GENE-040625-174]	-12.8821	0.00242592
E7F7U9	ENSDARG00000044980	kpna6	karyopherin alpha 6 (importin alpha 7) [Source:ZFIN;Acc:ZDB-GENE-130530-626]	-12.8793	0.00504437
E7FF92	ENSDARG00000014169	CABZ01041610.1		-12.875	0.00142475
A0A0R4IIR1	ENSDARG00000069937	dnm2a	dynamin 2a [Source:ZFIN;Acc:ZDB-GENE-050913-84]	-12.8727	0.00685497
A0A0R4IIR9	ENSDARG00000015352	lsg1	large 60S subunit nuclear export GTPase 1 [Source:NCBI gene;Acc:323464]	-12.8395	0.00535242
Q6DHI9	ENSDARG00000031511	psmb2	proteasome 20S subunit beta 2 [Source:ZFIN;Acc:ZDB-GENE-040718-353]	-12.7674	0.0307091
F1QAA7	ENSDARG00000037781	acss2	acyl-CoA synthetase short chain family member 2 [Source:ZFIN;Acc:ZDB-GENE-040718-388]	-12.7571	0.00296501
E7F2B2	ENSDARG00000035665	si:dkey-267n13.1	si:dkey-267n13.1 [Source:ZFIN;Acc:ZDB-GENE-141211-35]	-12.7528	0.00323456
A0A0R4INZ8	ENSDARG00000101561	dbt	dihydrolipoamide branched chain transacylase E2 [Source:ZFIN;Acc:ZDB-GENE-050320-85]	-12.7519	0.00423573
F6PBL6	ENSDARG00000022788	cops7a	COP9 constitutive photomorphogenic homolog subunit 7A [Source:ZFIN;Acc:ZDB-GENE-030131-8680]	-12.749	0.0034656
Q5SP67	ENSDARG00000006812	wdr26b	WD repeat domain 26b [Source:NCBI gene;Acc:564794]	-12.7472	0.00150176
A0A0H2UKQ6	ENSDARG00000103109	chl1b	cell adhesion molecule L1-like b [Source:ZFIN;Acc:ZDB-GENE-091105-1]	-12.7452	0.00188683
Q6P009	ENSDARG00000035601	dao.3	D-amino-acid oxidase, tandem duplicate 3 [Source:ZFIN;Acc:ZDB-GENE-040426-1894]	-12.7176	0.00234891
B3DFP9	ENSDARG00000015866	apoa2	apolipoprotein A-II [Source:ZFIN;Acc:ZDB-GENE-030131-1046]	-12.6687	0.00161728
A0A0R4I9B2	ENSDARG00000026595	pafah1b1b	platelet-activating factor acetylhydrolase 1b, regulatory subunit 1b [Source:NCBI gene;Acc:394247]	-12.6612	0.00550645
A0A0G2L6V9	ENSDARG00000098777	CU693379.1	crystallin beta-gamma domain containing 2 [Source:NCBI gene;Acc:569677]	-12.6479	0.00639621
F1QTF0	ENSDARG00000021220	hmgcl	3-hydroxy-3-methylglutaryl-CoA lyase [Source:ZFIN;Acc:ZDB-GENE-040426-958]	-12.6444	0.00335008
A0A2R8QM44	ENSDARG00000079782	myh7l	myosin heavy chain 7-like [Source:ZFIN;Acc:ZDB-GENE-061027-393]	-12.6373	0.00620367
F1QRV6	ENSDARG00000068868	nap1l4b	nucleosome assembly protein 1-like 4b [Source:ZFIN;Acc:ZDB-GENE-041114-168]	-12.6133	0.00373515
A0A0H2UJN9	ENSDARG00000105144	znf1130	zinc finger protein 1130 [Source:ZFIN;Acc:ZDB-GENE-131122-51]	-12.6042	0.00708151
F1Q510	ENSDARG00000038359	enosf1	enolase superfamily member 1 [Source:ZFIN;Acc:ZDB-GENE-060929-780]	-12.5885	0.00331157
Q1LXJ7	ENSDARG00000036832	cyt1l	type I cytokeratin, enveloping layer, like [Source:ZFIN;Acc:ZDB-GENE-061026-4]	-12.577	0.00727404
F1QZM0	ENSDARG00000038456	mrps35	mitochondrial ribosomal protein S35 [Source:NCBI gene;Acc:503880]	-12.5735	0.0040817
A1IH00	ENSDARG00000063197	golga2	golgin A2 [Source:NCBI gene;Acc:565431]	-12.5719	0.00269547
A0A0R4I9P9	ENSDARG00000104901	ostc	oligosaccharyltransferase complex subunit [Source:NCBI gene;Acc:393239]	-12.5675	0.00500586
Q566T0	ENSDARG00000099640	eed	embryonic ectoderm development [Source:NCBI gene;Acc:550463]	-12.4892	0.00315754
A0A2R8QP51	ENSDARG00000052606	dpp9	dipeptidyl-peptidase 9 [Source:ZFIN;Acc:ZDB-GENE-061013-777]	-12.4508	0.00758581
E7F0E2	ENSDARG00000024443	gnpda2	glucosamine-6-phosphate deaminase 2 [Source:ZFIN;Acc:ZDB-GENE-091117-41]	-12.4487	0.00473632
F1QAA0	ENSDARG00000045249	nif3l1	NIF3 NGG1 interacting factor 3-like 1 (S. cerevisiae) [Source:ZFIN;Acc:ZDB-GENE-050706-80]	-12.4383	0.00273397
A0A0R4ITH7	ENSDARG00000101719	pargl	poly (ADP-ribose) glycohydrolase, like [Source:ZFIN;Acc:ZDB-GENE-090313-286]	-12.4108	0.00261845
B8JKC9	ENSDARG00000101482	hk2	hexokinase 2 [Source:ZFIN;Acc:ZDB-GENE-040426-2017]	-12.4043	0.00689347
F1R8X6	ENSDARG00000006396	nrcama	neuronal cell adhesion molecule a [Source:ZFIN;Acc:ZDB-GENE-041210-235]	-12.3988	0.00777932
Q7T2P2	ENSDARG00000016173	cct3	chaperonin containing TCP1, subunit 3 (gamma) [Source:ZFIN;Acc:ZDB-GENE-020419-5]	-12.396	0.00215637
A0A0R4IEX1	ENSDARG00000104831	cep192	centrosomal protein 192 [Source:ZFIN;Acc:ZDB-GENE-100922-163]	-12.3651	0.00358112
A7MBU9	ENSDARG00000073786	cmbl	carboxymethylenebutenolidase homolog (Pseudomonas) [Source:ZFIN;Acc:ZDB-GENE-071004-21]	-12.3243	0.00651173
F1REN0	ENSDARG00000069742	cul5a	cullin 5a [Source:ZFIN;Acc:ZDB-GENE-030131-5426]	-12.2953	0.00836181
A0A0R4J7S6	ENSDARG00000015998	wdhd1	WD repeat and HMG-box DNA binding protein 1 [Source:ZFIN;Acc:ZDB-GENE-030131-1665]	-12.2635	0.00311904
A0A2R8QL35	ENSDARG00000020334	ptpn11a	protein tyrosine phosphatase non-receptor type 11a [Source:ZFIN;Acc:ZDB-GENE-030131-5911]	-12.2598	0.00227189
A0A0R4IC33	ENSDARG00000014420	elavl3	ELAV like neuron-specific RNA binding protein 3 [Source:ZFIN;Acc:ZDB-GENE-980526-76]	-12.2488	0.00512138
A3KNI7	ENSDARG00000039328	ccndbp1	cyclin D-type binding-protein 1 [Source:NCBI gene;Acc:553373]	-12.2481	0.0035041
Q1LYD7	ENSDARG00000032469	ampd3b	adenosine monophosphate deaminase 3b [Source:ZFIN;Acc:ZDB-GENE-030131-5929]	-12.2213	0.00192533
F1QU72	ENSDARG00000013150	dhx16	DEAH (Asp-Glu-Ala-His) box polypeptide 16 [Source:ZFIN;Acc:ZDB-GENE-030131-8589]	-12.2076	0.00589386
F1QDN6	ENSDARG00000063187	agpat5	1-acylglycerol-3-phosphate O-acyltransferase 5 (lysophosphatidic acid acyltransferase, epsilon) [Source:ZFIN;Acc:ZDB-GENE-060929-914]	-12.2056	0.00385067
F1R838	ENSDARG00000016415	dhtkd1	dehydrogenase E1 and transketolase domain containing 1 [Source:NCBI gene;Acc:494076]	-12.2033	0.00508288
F1R4V5	ENSDARG00000078500	dap3	death associated protein 3 [Source:ZFIN;Acc:ZDB-GENE-051129-2]	-12.1471	0.0023104
B8JIP2	ENSDARG00000052721	prim2	DNA primase subunit 2 [Source:ZFIN;Acc:ZDB-GENE-050522-471]	-12.1405	0.00207936
E7FC21	ENSDARG00000039399	nt5c2a	5'-nucleotidase, cytosolic IIa [Source:ZFIN;Acc:ZDB-GENE-030131-3566]	-12.1243	0.00211787
Q7T2P7	ENSDARG00000099776	glula	glutamate-ammonia ligase (glutamine synthase) a [Source:ZFIN;Acc:ZDB-GENE-030131-688]	-12.1061	0.0334838
Q6DGB2	ENSDARG00000003517	impa1	inositol monophosphatase 1 [Source:ZFIN;Acc:ZDB-GENE-040718-245]	-12.0924	0.00250293
A0A0R4IVY5	ENSDARG00000058993	rock1	Rho-associated, coiled-coil containing protein kinase 1 [Source:ZFIN;Acc:ZDB-GENE-100712-2]	-12.0411	0.00377365
A0A0R4IFP8	ENSDARG00000102153	nrp1a	neuropilin 1a [Source:NCBI gene;Acc:353246]	-12.038	0.00400469
A0A140LGM4	ENSDARG00000032601	macrod2	mono-ADP ribosylhydrolase 2 [Source:ZFIN;Acc:ZDB-GENE-040426-1490]	-12.03	0.0052369
A0A2R8Q6F8	ENSDARG00000116161	trip12	thyroid hormone receptor interactor 12 [Source:NCBI gene;Acc:564866]	-12.0199	0.00254144
Q6PBS6	ENSDARG00000078785	tmem258	transmembrane protein 258 [Source:NCBI gene;Acc:393742]	-12.0148	0.00458229
A0A0G2KXZ1	ENSDARG00000103042	ddah1	dimethylarginine dimethylaminohydrolase 1 [Source:NCBI gene;Acc:406561]	-12.0098	0.00238741
E9QEX9	ENSDARG00000077860	ankhd1	ankyrin repeat and KH domain containing 1 [Source:ZFIN;Acc:ZDB-GENE-090421-1]	-12.0014	0.00219488
F1QB53	ENSDARG00000016360	kpna1	karyopherin alpha 1 (importin alpha 5) [Source:ZFIN;Acc:ZDB-GENE-091116-39]	-11.9984	0.00871345
F1QZ57	ENSDARG00000032175	puf60a	poly-U binding splicing factor a [Source:ZFIN;Acc:ZDB-GENE-030131-2891]	-11.996	0.00277248
A5PF53	ENSDARG00000060297	arhgap35b	Rho GTPase activating protein 35b [Source:ZFIN;Acc:ZDB-GENE-060526-44]	-11.9535	0.00284949
A0A2R8PWG5	ENSDARG00000091367	prpf6	PRP6 pre-mRNA processing factor 6 homolog (S. cerevisiae) [Source:ZFIN;Acc:ZDB-GENE-030131-2575]	-11.9429	0.00431274
A0A0R4IC35	ENSDARG00000103266	ogal	O-GlcNAcase like [Source:ZFIN;Acc:ZDB-GENE-110914-153]	-11.9139	0.0040432
Q6P0B3	ENSDARG00000036911	scamp1	secretory carrier membrane protein 1 [Source:ZFIN;Acc:ZDB-GENE-040426-1803]	-11.9104	0.00369664
A0JMF4	ENSDARG00000102889	44089	septin 15 [Source:ZFIN;Acc:ZDB-GENE-061103-265]	-11.9093	0.002888
E7FAV9	ENSDARG00000015829	mov10a	Mov10 RISC complex RNA helicase a [Source:ZFIN;Acc:ZDB-GENE-091230-8]	-11.9054	0.00647322
B0S4Y9	ENSDARG00000077620	cdca7a	cell division cycle associated 7a [Source:ZFIN;Acc:ZDB-GENE-050417-29]	-11.8891	0.00450528
Q7ZV11	ENSDARG00000033596	polr2c	polymerase (RNA) II (DNA directed) polypeptide C [Source:ZFIN;Acc:ZDB-GENE-030131-6609]	-11.8678	0.00716048
Q9PUL9	ENSDARG00000019732	mtch2	mitochondrial carrier homolog 2 [Source:ZFIN;Acc:ZDB-GENE-991008-9]	-11.8658	0.00897811
A0A286YAZ1	ENSDARG00000011459	gsna	gelsolin a [Source:ZFIN;Acc:ZDB-GENE-030131-9653]	-11.8566	0.00338858
Q52JI7	ENSDARG00000024548	cryba4	crystallin, beta A4 [Source:ZFIN;Acc:ZDB-GENE-050522-143]	-11.8535	0.00396618
Q7ZVF2	ENSDARG00000100003	glulb	glutamate-ammonia ligase (glutamine synthase) b [Source:ZFIN;Acc:ZDB-GENE-030131-8417]	-11.8508	0.00577678
F1QAU7	ENSDARG00000074401	gnpat	glyceronephosphate O-acyltransferase [Source:ZFIN;Acc:ZDB-GENE-040618-4]	-11.8328	0.00300352
Q7ZW92	ENSDARG00000007405	strap	serine/threonine kinase receptor associated protein [Source:ZFIN;Acc:ZDB-GENE-040426-1110]	-11.8255	0.00828147
A0A0R4IUB7	ENSDARG00000102571	metap2b	methionyl aminopeptidase 2b [Source:ZFIN;Acc:ZDB-GENE-030131-2172]	-11.7995	0.034602
F1RAC0	ENSDARG00000006901	si:ch1073-459j12.1	si:ch1073-459j12.1 [Source:ZFIN;Acc:ZDB-GENE-030131-8546]	-11.7781	0.00442826
Q66L49	ENSDARG00000008568	slc25a24	solute carrier family 25 member 24 [Source:NCBI gene;Acc:447867]	-11.7188	0.00631919
F1QTS9	ENSDARG00000007130	mrto4	MRT4 homolog, ribosome maturation factor [Source:ZFIN;Acc:ZDB-GENE-050417-142]	-11.662	0.0308247
E7FB68	ENSDARG00000045308	pola1	polymerase (DNA directed), alpha 1 [Source:ZFIN;Acc:ZDB-GENE-030114-9]	-11.6527	0.00435125
Q66IB6	ENSDARG00000053990	hmgb2b	high mobility group box 2b [Source:ZFIN;Acc:ZDB-GENE-040912-122]	-11.6498	0.00308053
Q7SY26	ENSDARG00000017140	zgc:63587	zgc:63587 [Source:ZFIN;Acc:ZDB-GENE-040426-1175]	-11.6434	0.00327306
A0A0R4IYR2	ENSDARG00000099315	nsdhl	NAD(P) dependent steroid dehydrogenase-like [Source:ZFIN;Acc:ZDB-GENE-050417-163]	-11.5869	0.0272385
E7F5W0	ENSDARG00000061472	gba2	glucosidase, beta (bile acid) 2 [Source:ZFIN;Acc:ZDB-GENE-070522-3]	-11.5557	0.00731255
B0V0U4	ENSDARG00000003829	galnt2	UDP-N-acetyl-alpha-D-galactosamine:polypeptide N-acetylgalactosaminyltransferase 2 [Source:ZFIN;Acc:ZDB-GENE-041111-110]	-11.4943	0.0046593
Q68EG7	ENSDARG00000028539	morc2	MORC family CW-type zinc finger 2 [Source:ZFIN;Acc:ZDB-GENE-040822-40]	-11.4699	0.00481333
Q6PEH4	ENSDARG00000017696	utp25	UTP25 small subunit processor component [Source:NCBI gene;Acc:286787]	-11.4416	0.00628069
F1REM1	ENSDARG00000111748	acot15	acyl-CoA thioesterase 15 [Source:ZFIN;Acc:ZDB-GENE-041210-203]	-11.3966	0.00412021
Q5U3B5	ENSDARG00000037283	plrg1	pleiotropic regulator 1 [Source:ZFIN;Acc:ZDB-GENE-040426-2787]	-11.3946	0.0328649
E7F981	ENSDARG00000074955	nup98	nucleoporin 98 [Source:ZFIN;Acc:ZDB-GENE-040426-1180]	-11.3914	0.00804887
Q6NYL3	ENSDARG00000070029	ehhadh	enoyl-CoA, hydratase/3-hydroxyacyl CoA dehydrogenase [Source:NCBI gene;Acc:100000859]	-11.377	0.00381216
A7LNS7	ENSDARG00000027657	crhb	corticotropin releasing hormone b [Source:ZFIN;Acc:ZDB-GENE-041114-75]	-11.3619	0.00319605
B8A4D7	ENSDARG00000013763	rrbp1a	ribosome binding protein 1a [Source:ZFIN;Acc:ZDB-GENE-030131-9795]	-11.3497	0.00469781
A0A286Y9T4	ENSDARG00000095333	si:ch211-157j23.3	si:ch211-157j23.3 [Source:ZFIN;Acc:ZDB-GENE-091117-36]	-11.3374	0.00365813
F1QD40	ENSDARG00000063213	mtif2	mitochondrial translational initiation factor 2 [Source:ZFIN;Acc:ZDB-GENE-030131-1092]	-11.3364	0.00354261
A0A2R8Q264	ENSDARG00000111733	BX005002.2	phosphatidylinositol glycan anchor biosynthesis, class T [Source:NCBI gene;Acc:556667]	-11.2971	0.00492885
A2BEM8	ENSDARG00000011701	ctsll	cathepsin L, like [Source:ZFIN;Acc:ZDB-GENE-041010-76]	-11.2799	0.0309803
A2BHJ4	ENSDARG00000054597	cnot6l	CCR4-NOT transcription complex, subunit 6-like [Source:NCBI gene;Acc:553665]	-11.248	0.00361963
Q5XIZ6	ENSDARG00000040024	gpd1l	glycerol-3-phosphate dehydrogenase 1 like [Source:NCBI gene;Acc:449663]	-11.2306	0.00566126
Q7T3B1	ENSDARG00000020101	psmc2	proteasome 26S subunit, ATPase 2 [Source:ZFIN;Acc:ZDB-GENE-040426-1327]	-11.2252	0.00593237
F1QJW2	ENSDARG00000059738	ptprsa	protein tyrosine phosphatase receptor type Sa [Source:ZFIN;Acc:ZDB-GENE-020107-3]	-11.2153	0.00766282
A0A286Y8U4	ENSDARG00000054224	ipo11	importin 11 [Source:ZFIN;Acc:ZDB-GENE-040711-1]	-11.2	0.00666224
F1RE30	ENSDARG00000079313	pelp1	proline, glutamate and leucine rich protein 1 [Source:ZFIN;Acc:ZDB-GENE-140106-164]	-11.1903	0.00388917
Q5RI09	ENSDARG00000016630	tprb	translocated promoter region b, nuclear basket protein [Source:ZFIN;Acc:ZDB-GENE-030131-6410]	-11.1808	0.00600938
Q52WY2	ENSDARG00000044573	cdc42	cell division cycle 42 [Source:ZFIN;Acc:ZDB-GENE-030131-8783]	-11.1687	0.00573827
F1QQD3	ENSDARG00000021374	cab39l1	calcium binding protein 39, like 1 [Source:ZFIN;Acc:ZDB-GENE-040426-2897]	-11.1631	0.00489034
B3DI58	ENSDARG00000054321	ngs	notochord granular surface [Source:ZFIN;Acc:ZDB-GENE-080722-29]	-11.1165	0.0303241
Q6DBY0	ENSDARG00000098679	nup85	nucleoporin 85 [Source:HGNC Symbol;Acc:HGNC:8734]	-11.0799	0.00677932
Q7ZV92	ENSDARG00000015239	prpf19	pre-mRNA processing factor 19 [Source:ZFIN;Acc:ZDB-GENE-030131-263]	-11.0382	0.00643471
Q6IQS6	ENSDARG00000010487	sae1	SUMO1 activating enzyme subunit 1 [Source:NCBI gene;Acc:415148]	-11.0278	0.0339476
F1RAW8	ENSDARG00000060392	ash2l	ash2 like, histone lysine methyltransferase complex subunit [Source:ZFIN;Acc:ZDB-GENE-030131-494]	-11.0033	0.0348331
A0A1D5NS76	ENSDARG00000079374	tjp1b	tight junction protein 1b [Source:ZFIN;Acc:ZDB-GENE-070925-1]	-10.9649	0.00438976
Q08C96	ENSDARG00000059646	nt5dc2	5'-nucleotidase domain containing 2 [Source:ZFIN;Acc:ZDB-GENE-060810-17]	-10.9501	0.0051984
F1RAK0	ENSDARG00000075931	acsl5	acyl-CoA synthetase long chain family member 5 [Source:ZFIN;Acc:ZDB-GENE-040912-169]	-10.91	0.00616517
A3KMT0	ENSDARG00000019765	zgc:158803	zgc:158803 [Source:ZFIN;Acc:ZDB-GENE-070424-15]	-10.9083	0.00527541
A0A2R8QM05	ENSDARG00000112676	cbsa	cystathionine beta-synthase a [Source:ZFIN;Acc:ZDB-GENE-050417-367]	-10.8948	0.00485184
Q68EI0	ENSDARG00000041113	wdr18	WD repeat domain 18 [Source:NCBI gene;Acc:445819]	-10.8759	0.00624218
F8W2N0	ENSDARG00000002632	anxa11b	annexin A11b [Source:ZFIN;Acc:ZDB-GENE-030707-5]	-10.8739	0.0450645
B0V0X5	ENSDARG00000020427	nceh1a	neutral cholesterol ester hydrolase 1a [Source:ZFIN;Acc:ZDB-GENE-040711-2]	-10.8652	0.00496736
A0A286Y9X1	ENSDARG00000027016	gbf1	golgi brefeldin A resistant guanine nucleotide exchange factor 1 [Source:ZFIN;Acc:ZDB-GENE-081107-54]	-10.854	0.00419722
F1QWP7	ENSDARG00000043304	nop2	NOP2 nucleolar protein homolog (yeast) [Source:ZFIN;Acc:ZDB-GENE-050309-7]	-10.8146	0.0363
A0A2R8Q1X8	ENSDARG00000116682	vps26b	VPS26, retromer complex component B [Source:NCBI gene;Acc:406684]	-10.8098	0.00427424
F1QYT2	ENSDARG00000017034	sqor	sulfide quinone oxidoreductase [Source:ZFIN;Acc:ZDB-GENE-050417-436]	-10.8031	0.0401468
F1QWH7	ENSDARG00000012073	kif15	kinesin family member 15 [Source:ZFIN;Acc:ZDB-GENE-050622-16]	-10.801	0.00674081
Q08BC3	ENSDARG00000071224	si:ch211-133n4.4	si:ch211-133n4.4 [Source:ZFIN;Acc:ZDB-GENE-030131-898]	-10.7971	0.0394533
A0A0R4IWG6	ENSDARG00000035505	nelfb	negative elongation factor complex member B [Source:ZFIN;Acc:ZDB-GENE-040426-765]	-10.7884	0.0386832
A0A2R8RUC7	ENSDARG00000078497	timeless	timeless circadian clock [Source:ZFIN;Acc:ZDB-GENE-030131-8978]	-10.7437	0.00539093
A0A2R8QJ98	ENSDARG00000116903	hexdc	hexosaminidase (glycosyl hydrolase family 20, catalytic domain) containing [Source:ZFIN;Acc:ZDB-GENE-060929-448]	-10.7264	0.0063577
Q66HU4	ENSDARG00000041864	capn3a	calpain 3a, (p94) [Source:ZFIN;Acc:ZDB-GENE-040912-97]	-10.6613	0.0380291
Q19U09	ENSDARG00000022689	itgb1b.2	integrin, beta 1b.2 [Source:ZFIN;Acc:ZDB-GENE-040426-2598]	-10.6239	0.00542944
F1RB68	ENSDARG00000038293	zgc:103559	zgc:103559 [Source:ZFIN;Acc:ZDB-GENE-041212-22]	-10.588	0.00477482
A0A0G2KN75	ENSDARG00000103813	ATE1	arginyltransferase 1 [Source:NCBI gene;Acc:101886126]	-10.5855	0.00990227
Q8JFV5	ENSDARG00000054213	hectd1	HECT domain containing 1 [Source:ZFIN;Acc:ZDB-GENE-030616-153]	-10.5431	0.0060864
F1R2L8	ENSDARG00000032117	ddx1	DEAD (Asp-Glu-Ala-Asp) box helicase 1 [Source:ZFIN;Acc:ZDB-GENE-041001-215]	-10.5357	0.034679
Q503V2	ENSDARG00000102004	apoea	apolipoprotein Ea [Source:ZFIN;Acc:ZDB-GENE-010724-18]	-10.4892	0.0369932
Q6GQN6	ENSDARG00000004687	acaa1	acetyl-CoA acyltransferase 1 [Source:ZFIN;Acc:ZDB-GENE-040704-48]	-10.4597	0.00801036
Q5RKP9	ENSDARG00000053326	gna11b	guanine nucleotide binding protein (G protein), alpha 11b (Gq class) [Source:ZFIN;Acc:ZDB-GENE-041121-9]	-10.413	0.0388372
B0S5I6	ENSDARG00000021120	ndc1	NDC1 transmembrane nucleoporin [Source:NCBI gene;Acc:335236]	-10.4102	0.00662373
F1R003	ENSDARG00000086352	zp2.1	zona pellucida glycoprotein 2, tandem duplicate 1 [Source:ZFIN;Acc:ZDB-GENE-991129-5]	-10.4034	0.00597088
A9JT13	ENSDARG00000037966	thoc6	THO complex 6 [Source:NCBI gene;Acc:100004014]	-10.3711	0.0451787
F1Q7F8	ENSDARG00000055080	rbm4.2	RNA binding motif protein 4.2 [Source:ZFIN;Acc:ZDB-GENE-030131-3019]	-10.37	0.00697049
F1QD27	ENSDARG00000042724	supt5h	SPT5 homolog, DSIF elongation factor subunit [Source:NCBI gene;Acc:64275]	-10.3174	0.0405719
Q7ZUY0	ENSDARG00000031495	seta	SET nuclear proto-oncogene a [Source:ZFIN;Acc:ZDB-GENE-030131-2221]	-10.31	0.0461079
E9QBZ2	ENSDARG00000009023	ankrd28b	ankyrin repeat domain 28b [Source:ZFIN;Acc:ZDB-GENE-070622-4]	-10.2805	0.0351401
A0A2R8RJ59	ENSDARG00000112527	FP325130.1		-10.247	0.0046208
Q5RG12	ENSDARG00000024746	hsp90aa1.2	heat shock protein 90, alpha (cytosolic), class A member 1, tandem duplicate 2 [Source:ZFIN;Acc:ZDB-GENE-031001-3]	-10.2264	0.00604789
F1QQQ5	ENSDARG00000045262	gsnb	gelsolin b [Source:ZFIN;Acc:ZDB-GENE-030131-8567]	-10.2101	0.0444036
A0A0R4IJ00	ENSDARG00000101791	kyat3	kynurenine aminotransferase 3 [Source:NCBI gene;Acc:393315]	-10.1881	0.0366851
E9QCG7	ENSDARG00000061490	u2surp	U2 snRNP-associated SURP domain containing [Source:ZFIN;Acc:ZDB-GENE-070912-400]	-10.1864	0.0383765
E7F114	ENSDARG00000002916	sec31b	SEC31 homolog B, COPII coat complex component [Source:ZFIN;Acc:ZDB-GENE-060418-2]	-10.145	0.0364541
Q7ZW33	ENSDARG00000002720	utp15	UTP15 small subunit processome component [Source:NCBI gene;Acc:325106]	-10.1174	0.0424642
E7F349	ENSDARG00000054154	bms1	BMS1 ribosome biogenesis factor [Source:ZFIN;Acc:ZDB-GENE-060720-2]	-10.0987	0.00569976
F1RBJ9	ENSDARG00000038040	tpk1	thiamin pyrophosphokinase 1 [Source:ZFIN;Acc:ZDB-GENE-041010-176]	-10.067	0.00531392
A0A2R8QT57	ENSDARG00000117040	BX248397.2		-10.0617	0.00920915
F1R8Q3	ENSDARG00000071426	lrrc59	leucine rich repeat containing 59 [Source:NCBI gene;Acc:405868]	-10.0494	0.0499806
Q6NYJ5	ENSDARG00000026723	syncripl	synaptotagmin binding, cytoplasmic RNA interacting protein, like [Source:ZFIN;Acc:ZDB-GENE-030131-3104]	-9.9667	0.0353327
Q5TZ72	ENSDARG00000003750	pfas	phosphoribosylformylglycinamidine synthase [Source:ZFIN;Acc:ZDB-GENE-030131-4420]	-9.96442	0.0378751
X1WCS2	ENSDARG00000061862	myo18ab	myosin XVIIIAb [Source:ZFIN;Acc:ZDB-GENE-080423-1]	-9.89106	0.00562275
A0A0G2KSN1	ENSDARG00000035120	gldc	glycine dehydrogenase (decarboxylating) [Source:ZFIN;Acc:ZDB-GENE-030131-340]	-9.86176	0.0471186
A0A286Y8X9	ENSDARG00000109247	eef2b	eukaryotic translation elongation factor 2b [Source:ZFIN;Acc:ZDB-GENE-030131-5128]	-9.85048	0.0393344
Q5RIL7	ENSDARG00000019747	hsd3b2	hydroxy-delta-5-steroid dehydrogenase, 3 beta- and steroid delta-isomerase 2 [Source:ZFIN;Acc:ZDB-GENE-030828-2]	-9.8358	0.0441298
Q8JFW7	ENSDARG00000044972	bcap31	B cell receptor associated protein 31 [Source:ZFIN;Acc:ZDB-GENE-030616-63]	-9.77959	0.0448348
F1QZM7	ENSDARG00000026767	nol11	nucleolar protein 11 [Source:NCBI gene;Acc:321700]	-9.74283	0.0443266
Q2V6H0	ENSDARG00000051916	cdk7	cyclin-dependent kinase 7 [Source:ZFIN;Acc:ZDB-GENE-010320-2]	-9.73069	0.0419633
A0A286YA34	ENSDARG00000014962	ppp3cca	protein phosphatase 3, catalytic subunit, gamma isozyme, a [Source:ZFIN;Acc:ZDB-GENE-030829-36]	-9.67039	0.0391048
F6NTY9	ENSDARG00000003523	itln3	intelectin 3 [Source:ZFIN;Acc:ZDB-GENE-090527-4]	-9.65806	0.0464568
Q561Y0	ENSDARG00000037334	wdr92	WD repeat domain 92 [Source:NCBI gene;Acc:550284]	-9.57577	0.0487197
A0A0R4IC31	ENSDARG00000055678	akap12b	A kinase (PRKA) anchor protein 12b [Source:ZFIN;Acc:ZDB-GENE-030131-9753]	-9.54098	0.0392574
A0A0R4IMR1	ENSDARG00000104818	ces2b	carboxylesterase 2b [Source:ZFIN;Acc:ZDB-GENE-041014-96]	-9.51193	0.0429681
A0A0R4IIA7	ENSDARG00000017901	tln2a	talin 2a [Source:ZFIN;Acc:ZDB-GENE-040724-263]	-9.50941	0.0490635
Q1LV08	ENSDARG00000003487	nup93	nucleoporin 93 [Source:NCBI gene;Acc:30172]	-9.25693	0.0455657
A0A2R8QP95	ENSDARG00000113643	ralbb	v-ral simian leukemia viral oncogene homolog Bb (ras related) [Source:ZFIN;Acc:ZDB-GENE-040625-121]	-9.24279	0.0398772
F1QCH7	ENSDARG00000070416	zgc:162816	zgc:162816 [Source:ZFIN;Acc:ZDB-GENE-070410-94]	-9.19009	0.0438213
A0A0R4IJ07	ENSDARG00000094204	elp1	elongator complex protein 1 [Source:ZFIN;Acc:ZDB-GENE-071116-7]	-9.16696	0.0473542
E7FF34	ENSDARG00000004836	dnajc5ab	DnaJ (Hsp40) homolog, subfamily C, member 5ab [Source:ZFIN;Acc:ZDB-GENE-081021-2]	-9.1581	0.048872
F1Q6U0	ENSDARG00000075385	LO017852.1		-9.13225	0.0494044
F1QFJ8	ENSDARG00000005551	hnrnph1l	heterogeneous nuclear ribonucleoprotein H1, like [Source:ZFIN;Acc:ZDB-GENE-030131-275]	-9.07304	0.0441683
Q5U378	ENSDARG00000099921	tbce	tubulin folding cofactor E [Source:NCBI gene;Acc:664760]	-9.06604	0.0436288
F1QC72	ENSDARG00000042821	agps	alkylglycerone phosphate synthase [Source:ZFIN;Acc:ZDB-GENE-031118-14]	-9.06182	0.0474683
F1Q9K6	ENSDARG00000093235	TST	zgc:162544 [Source:ZFIN;Acc:ZDB-GENE-030131-9020]	-8.92462	0.0467254
A0A286Y9R5	ENSDARG00000090768	zp3.2	zona pellucida glycoprotein 3, tandem duplicate 2 [Source:ZFIN;Acc:ZDB-GENE-050626-121]	-8.91606	0.0468458
Q9DGK4	ENSDARG00000092693	tpt1	tumor protein, translationally-controlled 1 [Source:NCBI gene;Acc:30723]	-8.88672	0.0480043
A3KP59	ENSDARG00000067838	riox1	ribosomal oxygenase 1 [Source:NCBI gene;Acc:560815]	-8.86194	0.0416126
Q9PU58	ENSDARG00000007264	nipsnap2		-8.81967	0.0437828
A0A2R8Q8W5	ENSDARG00000016999	lin28a	lin-28 homolog A (C. elegans) [Source:NCBI gene;Acc:394066]	-8.80542	0.0440538
E7F742	ENSDARG00000056499	ca6	carbonic anhydrase VI [Source:ZFIN;Acc:ZDB-GENE-030131-7091]	-8.73518	0.0478514
Q6PC68	ENSDARG00000013443	atp6v1ba	ATPase, H+ transporting, lysosomal, V1 subunit B, member a [Source:ZFIN;Acc:ZDB-GENE-030711-3]	-8.68143	0.0475453
F1QC22	ENSDARG00000094736	znf1157	zinc finger protein 1157 [Source:ZFIN;Acc:ZDB-GENE-070424-89]	-8.62002	0.0168737
F1RBT2	ENSDARG00000025789	chd4b	chromodomain helicase DNA binding protein 4b [Source:ZFIN;Acc:ZDB-GENE-030131-4532]	-8.59066	0.0495151
F1RCP2	ENSDARG00000012981	osbpl7	oxysterol binding protein-like 7 [Source:ZFIN;Acc:ZDB-GENE-041010-212]	-8.57208	0.0464953
A0A0R4IHE1	ENSDARG00000115924	uba2	ubiquitin-like modifier activating enzyme 2 [Source:NCBI gene;Acc:406672]	-8.56836	0.0432033
A0A0R4IWU7	ENSDARG00000005540	xpo7	exportin 7 [Source:ZFIN;Acc:ZDB-GENE-060628-2]	-8.49649	0.0477727
A0A2R8Q8I4	ENSDARG00000113312	sco1	SCO cytochrome c oxidase assembly protein 1 [Source:ZFIN;Acc:ZDB-GENE-140909-1]	-8.3403	0.049102
B8JMA9	ENSDARG00000018272	wdr33	WD repeat domain 33 [Source:ZFIN;Acc:ZDB-GENE-040924-3]	-8.32284	0.0471572
B8A6A1	ENSDARG00000012274	eif4e1c	eukaryotic translation initiation factor 4E family member 1c [Source:ZFIN;Acc:ZDB-GENE-050417-398]	-8.19291	0.0486427
E7F1G8	ENSDARG00000018425	ddx61	DEAD (Asp-Glu-Ala-Asp) box helicase 61 [Source:ZFIN;Acc:ZDB-GENE-030131-6611]	-7.85131	0.0482707
B0V0X1	ENSDARG00000038910	pccb	propionyl-CoA carboxylase subunit beta [Source:ZFIN;Acc:ZDB-GENE-040426-2467]	-5.3691	0.00970973
F1R6L6	ENSDARG00000002710	ncl	nucleolin [Source:ZFIN;Acc:ZDB-GENE-030131-6986]	-4.85472	0.00936317
Q7ZTI0	ENSDARG00000029252	ssb	small RNA binding exonuclease protection factor La [Source:ZFIN;Acc:ZDB-GENE-030131-223]	-4.65376	0.0124455
Q58EG2	ENSDARG00000021991	erlin1	ER lipid raft associated 1 [Source:NCBI gene;Acc:541490]	-4.62939	0.00924765
A2BGR9	ENSDARG00000089924	aldh2.1	aldehyde dehydrogenase 2 family member, tandem duplicate 1 [Source:ZFIN;Acc:ZDB-GENE-040426-1262]	-4.59955	0.00932467
Q6NV33	ENSDARG00000030278	idh3a	isocitrate dehydrogenase (NAD(+)) 3 catalytic subunit alpha [Source:ZFIN;Acc:ZDB-GENE-040426-1007]	-4.59424	0.00693198
B0S6Z1	ENSDARG00000079725	dhx9	DEAH (Asp-Glu-Ala-His) box helicase 9 [Source:ZFIN;Acc:ZDB-GENE-070912-171]	-4.5315	0.0205719
A2AR68	ENSDARG00000056122	gdi1	GDP dissociation inhibitor 1 [Source:ZFIN;Acc:ZDB-GENE-050522-504]	-4.51136	0.0203794
Q7ZU46	ENSDARG00000004754	hspa4a	heat shock protein 4a [Source:ZFIN;Acc:ZDB-GENE-040426-2832]	-4.48588	0.00793432
A5PN55	ENSDARG00000100718	me2	malic enzyme 2, NAD(+)-dependent, mitochondrial [Source:NCBI gene;Acc:445233]	-4.336	0.0244611
B8JLR1	ENSDARG00000025269	pdcd6ip	programmed cell death 6 interacting protein [Source:ZFIN;Acc:ZDB-GENE-040426-2678]	-4.30777	0.00909363
E7FBD5	ENSDARG00000078888	iqgap1	IQ motif containing GTPase activating protein 1 [Source:ZFIN;Acc:ZDB-GENE-050809-24]	-4.08537	0.0203409
A0A0R4IUQ9	ENSDARG00000105177	ilf3b	interleukin enhancer binding factor 3b [Source:NCBI gene;Acc:321868]	-4.02901	0.0123685
A0A0R4ID68	ENSDARG00000099755	pfklb	phosphofructokinase, liver b [Source:ZFIN;Acc:ZDB-GENE-050417-62]	-4.02518	0.0158726
A0A2R8RN29	ENSDARG00000111186	hnrnpl	heterogeneous nuclear ribonucleoprotein L [Source:ZFIN;Acc:ZDB-GENE-040426-710]	-4.02176	0.0172973
A0A0G2L9C0	ENSDARG00000101347	CABZ01068251.1		-4.01655	0.011404
A0A0R4IAS2	ENSDARG00000101043	ppl	periplakin [Source:ZFIN;Acc:ZDB-GENE-041008-196]	-3.9287	0.00762432
Q8AW07	ENSDARG00000052377	psmd12	proteasome 26S subunit, non-ATPase 12 [Source:ZFIN;Acc:ZDB-GENE-030131-617]	-3.92531	0.0114425
B8JHR9	ENSDARG00000040245	kpnb3	karyopherin (importin) beta 3 [Source:ZFIN;Acc:ZDB-GENE-030424-2]	-3.83876	0.0134081
A0A0R4IP59	ENSDARG00000076623	col14a1b	collagen, type XIV, alpha 1b [Source:ZFIN;Acc:ZDB-GENE-030131-1985]	-3.82982	0.00890461
Q6NWH2	ENSDARG00000035715	marcksl1b	MARCKS-like 1b [Source:NCBI gene;Acc:406504]	-3.82529	0.0104414
B8JLW8	ENSDARG00000079848	gmps	guanine monophosphate synthase [Source:ZFIN;Acc:ZDB-GENE-040426-1503]	-3.75611	0.0134851
Q6P3H6	ENSDARG00000110463	pck2	phosphoenolpyruvate carboxykinase 2 (mitochondrial) [Source:ZFIN;Acc:ZDB-GENE-040426-2266]	-3.72559	0.0367621
F1QY96	ENSDARG00000040184	syncrip	synaptotagmin binding, cytoplasmic RNA interacting protein [Source:ZFIN;Acc:ZDB-GENE-030131-4862]	-3.71167	0.00843882
Q8JFT7	ENSDARG00000052641	kpna3	karyopherin alpha 3 (importin alpha 4) [Source:ZFIN;Acc:ZDB-GENE-030616-541]	-3.68887	0.018568
B3DFN3	ENSDARG00000101624	lmnb2	lamin B2 [Source:ZFIN;Acc:ZDB-GENE-990630-13]	-3.57034	0.0101718
Q6TGV6	ENSDARG00000003526	psma5	proteasome 20S subunit alpha 5 [Source:ZFIN;Acc:ZDB-GENE-040625-96]	-3.51486	0.0122144
Q52PJ5	ENSDARG00000002587	dpysl3	dihydropyrimidinase like 3 [Source:NCBI gene;Acc:553166]	-3.51235	0.00944019
A0A0R4IU19	ENSDARG00000101726	ces2b	carboxylesterase 2b [Source:ZFIN;Acc:ZDB-GENE-041014-96]	-3.48695	0.0189531
F1QSB8	ENSDARG00000037928	ddx42	DEAD (Asp-Glu-Ala-Asp) box helicase 42 [Source:ZFIN;Acc:ZDB-GENE-050706-53]	-3.46829	0.012715
A0A2R8QNF0	ENSDARG00000116074	vcp	valosin containing protein [Source:NCBI gene;Acc:327197]	-3.42938	0.00859421
F1QYT7	ENSDARG00000089643	mcama	melanoma cell adhesion molecule a [Source:ZFIN;Acc:ZDB-GENE-090218-29]	-3.42113	0.0232308
E7FCE5	ENSDARG00000078458	ppp1r37	protein phosphatase 1, regulatory subunit 37 [Source:NCBI gene;Acc:562516]	-3.35448	0.0159111
F1QAK5	ENSDARG00000058231	nt5c2b	5'-nucleotidase, cytosolic IIb [Source:ZFIN;Acc:ZDB-GENE-061013-522]	-3.32617	0.0167197
A0A2R8QPG3	ENSDARG00000013415	lmna	lamin A [Source:ZFIN;Acc:ZDB-GENE-020424-3]	-3.32066	0.0200309
Q1L907	ENSDARG00000042620	gstr	glutathione S-transferase rho [Source:ZFIN;Acc:ZDB-GENE-090507-1]	-3.31639	0.0360684
A0A2R8QCK3	ENSDARG00000115825	tle3a	TLE family member 3, transcriptional corepressor a [Source:NCBI gene;Acc:30206]	-3.23189	0.0136007
Q503K1	ENSDARG00000071586	tgfbi	transforming growth factor, beta-induced [Source:ZFIN;Acc:ZDB-GENE-030131-73]	-3.20226	0.00901662
F1QU55	ENSDARG00000013430	bhmt	betaine-homocysteine methyltransferase [Source:NCBI gene;Acc:322228]	-3.18412	0.00785536
Q7ZVW8	ENSDARG00000003382	cwc25	CWC25 spliceosome associated protein homolog [Source:ZFIN;Acc:ZDB-GENE-040426-2817]	-3.17713	0.0111345
B8JL29	ENSDARG00000029722	hmgb2a	high mobility group box 2a [Source:ZFIN;Acc:ZDB-GENE-051120-126]	-3.16731	0.0105569
B0UYL5	ENSDARG00000011770	dhrs12	dehydrogenase/reductase (SDR family) member 12 [Source:ZFIN;Acc:ZDB-GENE-060929-1134]	-3.15915	0.0276628
Q6DRE5	ENSDARG00000012820	nop56	NOP56 ribonucleoprotein homolog [Source:ZFIN;Acc:ZDB-GENE-040109-1]	-3.15592	0.0109419
F1QF00	ENSDARG00000013561	pgm1	phosphoglucomutase 1 [Source:ZFIN;Acc:ZDB-GENE-040426-1245]	-3.13995	0.041224
A0A0R4IHT0	ENSDARG00000102362	slc25a12	solute carrier family 25 member 12 [Source:ZFIN;Acc:ZDB-GENE-031006-11]	-3.104	0.0327879
F1QHE5	ENSDARG00000063100	psmd14	proteasome 26S subunit, non-ATPase 14 [Source:ZFIN;Acc:ZDB-GENE-070410-56]	-3.09436	0.0193016
Q6DRD1	ENSDARG00000001788	atp5po	ATP synthase peripheral stalk subunit OSCP [Source:ZFIN;Acc:ZDB-GENE-050522-147]	-3.03267	0.0233454
I3ISA6	ENSDARG00000096359	eppk1	epiplakin 1 [Source:ZFIN;Acc:ZDB-GENE-030416-1]	-3.02768	0.0199924
B8A569	ENSDARG00000067997	myhz1.3	myosin, heavy polypeptide 1.3, skeletal muscle [Source:ZFIN;Acc:ZDB-GENE-070705-74]	-3.01821	0.012869
Q5RGI2	ENSDARG00000016010	nup107	nucleoporin 107 [Source:ZFIN;Acc:ZDB-GENE-041210-245]	-3.01209	0.0107494
Q6P043	ENSDARG00000034470	aldoab	aldolase a, fructose-bisphosphate, b [Source:ZFIN;Acc:ZDB-GENE-040426-2299]	-2.98019	0.0211495
Q2MJQ9	ENSDARG00000091253	smyd1b	SET and MYND domain containing 1b [Source:ZFIN;Acc:ZDB-GENE-060522-1]	-2.95779	0.0140242
Q8JG73	ENSDARG00000052674	csnk1a1	casein kinase 1, alpha 1 [Source:ZFIN;Acc:ZDB-GENE-020419-19]	-2.93529	0.01125
A0A140LFP0	ENSDARG00000022101	obscnb	obscurin, cytoskeletal calmodulin and titin-interacting RhoGEF b [Source:ZFIN;Acc:ZDB-GENE-070119-5]	-2.91937	0.011096
B3DJ50	ENSDARG00000103347	cyp2aa3	cytochrome P450, family 2, subfamily AA, polypeptide 3 [Source:ZFIN;Acc:ZDB-GENE-031030-8]	-2.86526	0.0264668
A0A2R8Q108	ENSDARG00000009724	rpn2	ribophorin II [Source:ZFIN;Acc:ZDB-GENE-030131-7928]	-2.85844	0.0246536
F1QL44	ENSDARG00000018820	flncb	filamin C, gamma b (actin binding protein 280) [Source:ZFIN;Acc:ZDB-GENE-041008-175]	-2.84296	0.0209185
Q7ZU69	ENSDARG00000016239	psmd13	proteasome 26S subunit, non-ATPase 13 [Source:ZFIN;Acc:ZDB-GENE-040426-1004]	-2.8415	0.0115983
A9C3P0	ENSDARG00000059630	mlec	malectin [Source:NCBI gene;Acc:569613]	-2.82508	0.0247692
A0A2R8Q9M0	ENSDARG00000109512	CU633479.3	myosin-7 [Source:NCBI gene;Acc:100329813]	-2.81864	0.0137547
F6P731	ENSDARG00000089124	hbae1.3	hemoglobin, alpha embryonic 1.3 [Source:ZFIN;Acc:ZDB-GENE-061207-39]	-2.81372	0.0456812
F1QB21	ENSDARG00000003869	decr1	2,4-dienoyl CoA reductase 1, mitochondrial [Source:ZFIN;Acc:ZDB-GENE-040718-142]	-2.80248	0.0226918
Q6DRC0	ENSDARG00000008237	sars1	seryl-tRNA synthetase 1 [Source:NCBI gene;Acc:445405]	-2.80112	0.0209955
Q8AW60	ENSDARG00000042853	ivd	isovaleryl-CoA dehydrogenase [Source:ZFIN;Acc:ZDB-GENE-030616-262]	-2.79434	0.00955571
F1QEW3	ENSDARG00000023190	kpna4	karyopherin alpha 4 (importin alpha 3) [Source:ZFIN;Acc:ZDB-GENE-030131-5584]	-2.79189	0.0377211
A9C3T0	ENSDARG00000033184	prkar2aa	protein kinase, cAMP-dependent, regulatory, type II, alpha A [Source:ZFIN;Acc:ZDB-GENE-030131-1007]	-2.78722	0.0325954
B8JI00	ENSDARG00000052712	suclg1	succinate-CoA ligase, alpha subunit [Source:ZFIN;Acc:ZDB-GENE-040912-101]	-2.785	0.00959421
Q7ZVK8	ENSDARG00000070573	mapk3	mitogen-activated protein kinase 3 [Source:ZFIN;Acc:ZDB-GENE-040121-1]	-2.76649	0.0365696
A0A2R8QTW5	ENSDARG00000075331	golga4	golgin A4 [Source:ZFIN;Acc:ZDB-GENE-050208-275]	-2.75626	0.0156415
Q4KME9	ENSDARG00000015524	prps1a	phosphoribosyl pyrophosphate synthetase 1A [Source:ZFIN;Acc:ZDB-GENE-011212-5]	-2.75507	0.0232694
Q1LVV8	ENSDARG00000019000	smc3	structural maintenance of chromosomes 3 [Source:ZFIN;Acc:ZDB-GENE-030131-3196]	-2.74612	0.0221507
Q7ZU89	ENSDARG00000031214	arcn1b	archain 1b [Source:ZFIN;Acc:ZDB-GENE-040121-7]	-2.74273	0.015603
A0A2R8QB05	ENSDARG00000063309	tjp2a	tight junction protein 2a (zona occludens 2) [Source:ZFIN;Acc:ZDB-GENE-070925-2]	-2.7392	0.0128305
Q8AWD0	ENSDARG00000013623	vdac2	voltage-dependent anion channel 2 [Source:ZFIN;Acc:ZDB-GENE-030131-845]	-2.73102	0.0117909
B0UYD6	ENSDARG00000010316	qars1	glutaminyl-tRNA synthetase 1 [Source:ZFIN;Acc:ZDB-GENE-040426-1011]	-2.72816	0.0136777
E7FCD8	ENSDARG00000076318	atp6v1ab	ATPase H+ transporting V1 subunit Ab [Source:ZFIN;Acc:ZDB-GENE-030131-9529]	-2.71909	0.0292056
Q6NZ06	ENSDARG00000014591	ilf2	interleukin enhancer binding factor 2 [Source:NCBI gene;Acc:406517]	-2.69441	0.0103643
Q9DEG7	ENSDARG00000057007	ctbp1	C-terminal binding protein 1 [Source:ZFIN;Acc:ZDB-GENE-010130-1]	-2.68835	0.0132926
A0A0R4IJT8	ENSDARG00000008243	cct8	chaperonin containing TCP1, subunit 8 (theta) [Source:ZFIN;Acc:ZDB-GENE-040426-876]	-2.66523	0.0312113
A4QPA0	ENSDARG00000002305	me3	malic enzyme 3, NADP(+)-dependent, mitochondrial [Source:ZFIN;Acc:ZDB-GENE-041111-294]	-2.66387	0.00879046
Q1L8L9	ENSDARG00000005926	ak2	adenylate kinase 2 [Source:NCBI gene;Acc:321793]	-2.65186	0.0194533
F1QE25	ENSDARG00000003213	naa15a	N(alpha)-acetyltransferase 15, NatA auxiliary subunit a [Source:ZFIN;Acc:ZDB-GENE-030131-2392]	-2.65159	0.0144863
Q4VBU0	ENSDARG00000040555	bckdha	branched chain keto acid dehydrogenase E1 subunit alpha [Source:ZFIN;Acc:ZDB-GENE-050522-376]	-2.64915	0.0407258
Q7T340	ENSDARG00000039345	drg1	developmentally regulated GTP binding protein 1 [Source:ZFIN;Acc:ZDB-GENE-030131-8767]	-2.63987	0.0370702
Q6TNT8	ENSDARG00000018174	gnai2a	guanine nucleotide binding protein (G protein), alpha inhibiting activity polypeptide 2a [Source:ZFIN;Acc:ZDB-GENE-030131-8365]	-2.62714	0.00940168
Q9PTS2	ENSDARG00000006818	urod	uroporphyrinogen decarboxylase [Source:NCBI gene;Acc:30617]	-2.62626	0.0485274
F1R3G8	ENSDARG00000055760	srm	spermidine synthase [Source:ZFIN;Acc:ZDB-GENE-040426-1183]	-2.61633	0.0265053
B8JLL1	ENSDARG00000012215	umps	uridine monophosphate synthetase [Source:ZFIN;Acc:ZDB-GENE-040426-785]	-2.61371	0.0182985
A0A2R8RZT9	ENSDARG00000075433	myom2a	myomesin 2a [Source:ZFIN;Acc:ZDB-GENE-030131-6201]	-2.60592	0.00997928
A0A2R8RNT6	ENSDARG00000062226	ino80db	INO80 complex subunit Db [Source:NCBI gene;Acc:563304]	-2.60123	0.0120604
F1QPL7	ENSDARG00000028982	pcca	propionyl-CoA carboxylase subunit alpha [Source:ZFIN;Acc:ZDB-GENE-040718-246]	-2.60061	0.0200694
F1QNA0	ENSDARG00000038563	pitrm1	pitrilysin metallopeptidase 1 [Source:NCBI gene;Acc:406808]	-2.59908	0.0166042
Q6P0V8	ENSDARG00000016470	anxa5b	annexin A5b [Source:ZFIN;Acc:ZDB-GENE-030131-9076]	-2.59716	0.0287435
B0S642	ENSDARG00000054867	hibch	3-hydroxyisobutyryl-CoA hydrolase [Source:NCBI gene;Acc:798364]	-2.58276	0.0195303
B8JIS8	ENSDARG00000042533	gstm.1	glutathione S-transferase mu, tandem duplicate 1 [Source:ZFIN;Acc:ZDB-GENE-030911-2]	-2.58134	0.012407
E7F4R9	ENSDARG00000003795	idh2	isocitrate dehydrogenase (NADP(+)) 2 [Source:ZFIN;Acc:ZDB-GENE-031118-95]	-2.57803	0.00840031
A0A286YB68	ENSDARG00000041703	rrbp1b	ribosome binding protein 1b [Source:ZFIN;Acc:ZDB-GENE-030429-36]	-2.57548	0.0318659
F1QQZ1	ENSDARG00000056138	sf3b1	splicing factor 3b, subunit 1 [Source:ZFIN;Acc:ZDB-GENE-040827-3]	-2.57375	0.0118679
A0A0R4IGQ8	ENSDARG00000104836	myom1b	myomesin 1b [Source:ZFIN;Acc:ZDB-GENE-080416-2]	-2.56946	0.0142553
A0A2R8QA12	ENSDARG00000000472	cntn2	contactin 2 [Source:ZFIN;Acc:ZDB-GENE-990630-12]	-2.53817	0.0246151
X1WCD4	ENSDARG00000091905	si:dkey-108k21.21	si:dkey-108k21.21 [Source:ZFIN;Acc:ZDB-GENE-131127-5]	-2.53775	0.0109805
F1QL68	ENSDARG00000016782	huwe1	HECT, UBA and WWE domain containing E3 ubiquitin protein ligase 1 [Source:ZFIN;Acc:ZDB-GENE-081104-387]	-2.52352	0.0399928
Q6NYN3	ENSDARG00000035751	ipo7	importin 7 [Source:ZFIN;Acc:ZDB-GENE-030131-458]	-2.50281	0.0229613
Q7ZTZ4	ENSDARG00000053912	fbl	fibrillarin [Source:ZFIN;Acc:ZDB-GENE-040426-1936]	-2.48865	0.0171433
A3QJW5	ENSDARG00000030700	ctps1a	CTP synthase 1a [Source:NCBI gene;Acc:322089]	-2.48628	0.0106339
Q6AZ98	ENSDARG00000019360	sec23b	SEC23 homolog B, coat complex II component [Source:ZFIN;Acc:ZDB-GENE-030131-5479]	-2.48369	0.0185295
A0A2R8QJU6	ENSDARG00000052148	ptgs1	prostaglandin-endoperoxide synthase 1 [Source:ZFIN;Acc:ZDB-GENE-020530-1]	-2.47006	0.0341034
B8JK21	ENSDARG00000017905	casp3a	caspase 3, apoptosis-related cysteine peptidase a [Source:ZFIN;Acc:ZDB-GENE-011210-1]	-2.46055	0.0206489
A0A0G2KGL2	ENSDARG00000101089	gart	phosphoribosylglycinamide formyltransferase [Source:ZFIN;Acc:ZDB-GENE-000616-14]	-2.4588	0.0369161
A0A2R9YJL1	ENSDARG00000017772	mdh1aa	malate dehydrogenase 1Aa, NAD (soluble) [Source:ZFIN;Acc:ZDB-GENE-040204-1]	-2.44768	0.00905512
Q7ZV77	ENSDARG00000045928	psma4	proteasome 20S subunit alpha 4 [Source:ZFIN;Acc:ZDB-GENE-040426-1932]	-2.44009	0.0180289
B8JIP9	ENSDARG00000052480	pdcd11	programmed cell death 11 [Source:ZFIN;Acc:ZDB-GENE-030131-4076]	-2.43235	0.00986376
F1QX52	ENSDARG00000036239	gatm	glycine amidinotransferase (L-arginine:glycine amidinotransferase) [Source:NCBI gene;Acc:266799]	-2.42541	0.0143708
Q7ZWD3	ENSDARG00000005827	eif2s1a	eukaryotic translation initiation factor 2, subunit 1 alpha a [Source:ZFIN;Acc:ZDB-GENE-030131-526]	-2.41516	0.0144093
Q7ZVF3	ENSDARG00000016721	sdha	succinate dehydrogenase complex, subunit A, flavoprotein (Fp) [Source:NCBI gene;Acc:393884]	-2.41275	0.0226532
Q9I9E9	ENSDARG00000052178	eif2s1b	eukaryotic translation initiation factor 2, subunit 1 alpha b [Source:ZFIN;Acc:ZDB-GENE-030131-283]	-2.4113	0.0168352
Q6IQ59	ENSDARG00000071691	uqcrc2b	ubiquinol-cytochrome c reductase core protein 2b [Source:ZFIN;Acc:ZDB-GENE-030131-1269]	-2.41031	0.0250387
A8WGC6	ENSDARG00000070083	atp5f1b	ATP synthase F1 subunit beta [Source:ZFIN;Acc:ZDB-GENE-030131-124]	-2.38951	0.0428509
E7F354	ENSDARG00000071658	ywhag2	3-monooxygenase/tryptophan 5-monooxygenase activation protein, gamma polypeptide 2 [Source:ZFIN;Acc:ZDB-GENE-061023-2]	-2.38515	0.0319044
B8JIS1	ENSDARG00000011553	atp5pb	ATP synthase peripheral stalk-membrane subunit b [Source:ZFIN;Acc:ZDB-GENE-041010-33]	-2.38473	0.0146018
E7EYD0	ENSDARG00000061249	myom1a	myomesin 1a (skelemin) [Source:ZFIN;Acc:ZDB-GENE-030131-2856]	-2.37416	0.0147174
A6H8Q3	ENSDARG00000003081	mybphb	myosin binding protein Hb [Source:ZFIN;Acc:ZDB-GENE-030131-9794]	-2.37158	0.0174513
Q6DRP3	ENSDARG00000091563	snw1	SNW domain containing 1 [Source:ZFIN;Acc:ZDB-GENE-030131-571]	-2.37128	0.0195688
Q7ZUN7	ENSDARG00000016598	ckmt1	creatine kinase, mitochondrial 1 [Source:ZFIN;Acc:ZDB-GENE-030131-611]	-2.37105	0.0135622
F1RCA1	ENSDARG00000037559	uba1	ubiquitin-like modifier activating enzyme 1 [Source:ZFIN;Acc:ZDB-GENE-040426-2009]	-2.36786	0.012484
A0A2R8Q952	ENSDARG00000112391	armt1	acidic residue methyltransferase 1 [Source:NCBI gene;Acc:541518]	-2.36573	0.0105184
E7F4J8	ENSDARG00000043357	tbl2	transducin (beta)-like 2 [Source:ZFIN;Acc:ZDB-GENE-030131-9012]	-2.36549	0.0136392
Q7T3G5	ENSDARG00000059259	pabpc4	poly(A) binding protein, cytoplasmic 4 (inducible form) [Source:ZFIN;Acc:ZDB-GENE-030131-9663]	-2.36549	0.0335993
E7F3I8	ENSDARG00000015392	dhx15	DEAH (Asp-Glu-Ala-His) box helicase 15 [Source:ZFIN;Acc:ZDB-GENE-030131-650]	-2.35964	0.0152179
Q9PWD8	ENSDARG00000092947	cyt1	type I cytokeratin, enveloping layer [Source:ZFIN;Acc:ZDB-GENE-991008-6]	-2.35955	0.00886611
A0A0R4IVN8	ENSDARG00000102974	baz2a	bromodomain adjacent to zinc finger domain, 2A [Source:ZFIN;Acc:ZDB-GENE-041010-202]	-2.35781	0.0228843
Q90474	ENSDARG00000010478	hsp90aa1.1	heat shock protein 90, alpha (cytosolic), class A member 1, tandem duplicate 1 [Source:NCBI gene;Acc:30591]	-2.35744	0.0161421
F1QZ09	ENSDARG00000099079	aclya	ATP citrate lyase a [Source:ZFIN;Acc:ZDB-GENE-031113-1]	-2.35623	0.0187991
A2BHA3	ENSDARG00000035327	ckma	creatine kinase, muscle a [Source:ZFIN;Acc:ZDB-GENE-980526-109]	-2.35194	0.00963272
F1R7S1	ENSDARG00000018562	cope	coatomer protein complex, subunit epsilon [Source:ZFIN;Acc:ZDB-GENE-041114-59]	-2.34252	0.011327
Q568B3	ENSDARG00000099236	44084	septin 10 [Source:ZFIN;Acc:ZDB-GENE-050417-3]	-2.34013	0.0251542
A0A0R4IAU8	ENSDARG00000099742	heatr1	HEAT repeat containing 1 [Source:NCBI gene;Acc:334446]	-2.32372	0.0131771
F1R264	ENSDARG00000040255	ephx2	epoxide hydrolase 2, cytoplasmic [Source:ZFIN;Acc:ZDB-GENE-041212-70]	-2.31157	0.00928616
A0A0R4IFJ4	ENSDARG00000098766	pcxa	pyruvate carboxylase a [Source:ZFIN;Acc:ZDB-GENE-090908-3]	-2.30026	0.0389132
Q6PBW8	ENSDARG00000053656	lypla2	lysophospholipase 2 [Source:ZFIN;Acc:ZDB-GENE-040426-1715]	-2.28967	0.0220737
F1Q665	ENSDARG00000069829	rragca	Ras-related GTP binding Ca [Source:ZFIN;Acc:ZDB-GENE-050522-355]	-2.28662	0.0230383
A0A0R4IF09	ENSDARG00000116250	ppp3ccb	protein phosphatase 3, catalytic subunit, gamma isozyme, b [Source:ZFIN;Acc:ZDB-GENE-070112-1102]	-2.28536	0.0149099
A1L1V1	ENSDARG00000099143	fnta	farnesyltransferase, CAAX box, alpha [Source:ZFIN;Acc:ZDB-GENE-030131-866]	-2.27224	0.0102488
E9QC86	ENSDARG00000015208	rbb4l	retinoblastoma binding protein 4, like [Source:NCBI gene;Acc:322129]	-2.26343	0.0304396
F1QVG2	ENSDARG00000019976	idi1	isopentenyl-diphosphate delta isomerase 1 [Source:ZFIN;Acc:ZDB-GENE-050913-44]	-2.26145	0.0289361
Q6P3L9	ENSDARG00000101074	glud1b	glutamate dehydrogenase 1b [Source:ZFIN;Acc:ZDB-GENE-030828-1]	-2.25351	0.0499029
U3JAH9	ENSDARG00000075883	bub3	BUB3 mitotic checkpoint protein [Source:ZFIN;Acc:ZDB-GENE-041010-210]	-2.25021	0.0150639
F1QFC0	ENSDARG00000003035	hspa9	heat shock protein 9 [Source:ZFIN;Acc:ZDB-GENE-030828-12]	-2.25021	0.0306321
F1Q5K3	ENSDARG00000058102	sardh	sarcosine dehydrogenase [Source:ZFIN;Acc:ZDB-GENE-040426-996]	-2.24921	0.0176054
F6P8R2	ENSDARG00000004634	osbp	oxysterol binding protein [Source:ZFIN;Acc:ZDB-GENE-090312-18]	-2.24013	0.0116368
Q803B0	ENSDARG00000056160	hspd1	heat shock 60 protein 1 [Source:ZFIN;Acc:ZDB-GENE-021206-1]	-2.22705	0.0119834
Q66HV4	ENSDARG00000056557	copb1	coatomer protein complex, subunit beta 1 [Source:NCBI gene;Acc:338138]	-2.21833	0.0375285
A0A2R8RVY6	ENSDARG00000112823	hpf1	histone PARylation factor 1 [Source:NCBI gene;Acc:100002184]	-2.21791	0.0146789
O42363	ENSDARG00000012076	apoa1a	apolipoprotein A-Ia [Source:NCBI gene;Acc:30355]	-2.21679	0.0287821
A0A2R8Q8P2	ENSDARG00000060679	kdm1a	lysine (K)-specific demethylase 1a [Source:ZFIN;Acc:ZDB-GENE-030131-7828]	-2.20723	0.0163346
E7FF41	ENSDARG00000026764	ahsg1	alpha-2-HS-glycoprotein 1 [Source:ZFIN;Acc:ZDB-GENE-041114-50]	-2.18931	0.0408028
P13104	ENSDARG00000033683	tpma	alpha-tropomyosin [Source:NCBI gene;Acc:30324]	-2.18906	0.0146403
U3JAV8	ENSDARG00000041895	cad	carbamoyl-phosphate synthetase 2, aspartate transcarbamylase, and dihydroorotase [Source:ZFIN;Acc:ZDB-GENE-021030-4]	-2.18048	0.020957
F1R446	ENSDARG00000019231	sptan1	spectrin alpha, non-erythrocytic 1 [Source:ZFIN;Acc:ZDB-GENE-051113-60]	-2.17251	0.0119449
A0A2R8QJ70	ENSDARG00000003920	setb	SET nuclear proto-oncogene b [Source:ZFIN;Acc:ZDB-GENE-030131-433]	-2.16525	0.0454871
A0A0R4IC37	ENSDARG00000034178	cpsf1	cleavage and polyadenylation specific factor 1 [Source:ZFIN;Acc:ZDB-GENE-040709-2]	-2.16326	0.020803
Q1LXD4	ENSDARG00000029058	rbbp4	retinoblastoma binding protein 4 [Source:NCBI gene;Acc:321726]	-2.16314	0.0177594
Q6PC13	ENSDARG00000045297	phb2a	prohibitin 2a [Source:ZFIN;Acc:ZDB-GENE-030131-3141]	-2.16255	0.0133696
F1QI59	ENSDARG00000044153	ppp1cb	protein phosphatase 1, catalytic subunit, beta isozyme [Source:ZFIN;Acc:ZDB-GENE-030616-609]	-2.16254	0.0293211
A0A2R8Q7Q6	ENSDARG00000101762	fah	fumarylacetoacetate hydrolase (fumarylacetoacetase) [Source:ZFIN;Acc:ZDB-GENE-030131-1091]	-2.15364	0.0179904
Q6DC41	ENSDARG00000039669	TSTA3	zgc:100864 [Source:ZFIN;Acc:ZDB-GENE-040801-35]	-2.14878	0.0231923
A0A2R8Q0N5	ENSDARG00000112216	cpt2	carnitine palmitoyltransferase 2 [Source:NCBI gene;Acc:100005717]	-2.14536	0.018183
F1R3G4	ENSDARG00000000103	myh10	myosin, heavy chain 10, non-muscle [Source:ZFIN;Acc:ZDB-GENE-030616-162]	-2.13636	0.015295
A0A0R4IRJ2	ENSDARG00000009685	ppa2	inorganic pyrophosphatase 2 [Source:ZFIN;Acc:ZDB-GENE-040426-1857]	-2.13403	0.0149869
P79733	ENSDARG00000020711	rrm2	ribonucleotide reductase regulatory subunit M2 [Source:NCBI gene;Acc:100330864]	-2.12785	0.0437058
F1R6I7	ENSDARG00000021265	mybpc2b	myosin binding protein C, fast type b [Source:ZFIN;Acc:ZDB-GENE-050320-80]	-2.12486	0.0140627
B0R0V8	ENSDARG00000006370	atp6v1h	ATPase H+ transporting V1 subunit H [Source:ZFIN;Acc:ZDB-GENE-021219-2]	-2.12447	0.0250002
Q5PR93	ENSDARG00000032237	anapc4	anaphase promoting complex subunit 4 [Source:ZFIN;Acc:ZDB-GENE-041212-10]	-2.12162	0.0176439
A0A140LGK1	ENSDARG00000023188	lcp1	lymphocyte cytosolic protein 1 (L-plastin) [Source:NCBI gene;Acc:30583]	-2.11062	0.0271214
A0A0G2KGY0	ENSDARG00000100188	rnps1	RNA binding protein with serine rich domain 1 [Source:HGNC Symbol;Acc:HGNC:10080]	-2.10739	0.0145633
Q5RHQ7	ENSDARG00000004735	hnrnpub	heterogeneous nuclear ribonucleoprotein Ub [Source:ZFIN;Acc:ZDB-GENE-030131-6422]	-2.10604	0.0219967
Q6TNT9	ENSDARG00000005451	gdi2	GDP dissociation inhibitor 2 [Source:ZFIN;Acc:ZDB-GENE-030131-2485]	-2.10305	0.0166427
B8A561	ENSDARG00000067995	myhz1.2	myosin, heavy polypeptide 1.2, skeletal muscle [Source:ZFIN;Acc:ZDB-GENE-070705-73]	-2.09796	0.012561
F1QZY9	ENSDARG00000031366	rtn4ip1	reticulon 4 interacting protein 1 [Source:NCBI gene;Acc:393323]	-2.09687	0.0224202
F1R2K9	ENSDARG00000014017	rrm1	ribonucleotide reductase M1 polypeptide [Source:NCBI gene;Acc:30740]	-2.08805	0.0212265
A0A286YAZ4	ENSDARG00000043493	cltca	clathrin, heavy chain a (Hc) [Source:ZFIN;Acc:ZDB-GENE-030131-2299]	-2.088	0.012638
R4GDQ0	ENSDARG00000078751	tpp2	tripeptidyl peptidase 2 [Source:ZFIN;Acc:ZDB-GENE-121214-290]	-2.08622	0.0125225
Q6DHQ3	ENSDARG00000005525	acy3.2	aspartoacylase (aminocyclase) 3, tandem duplicate 2 [Source:NCBI gene;Acc:436619]	-2.08329	0.0100948
Q6NWC1	ENSDARG00000045132	vdac1	voltage-dependent anion channel 1 [Source:ZFIN;Acc:ZDB-GENE-030131-6514]	-2.08169	0.0247306
F1QYX8	ENSDARG00000060594	hadhab	hydroxyacyl-CoA dehydrogenase trifunctional multienzyme complex subunit alpha b [Source:ZFIN;Acc:ZDB-GENE-041111-204]	-2.07322	0.0222277
A0A0R4IMZ8	ENSDARG00000104889	kpnb1	karyopherin (importin) beta 1 [Source:ZFIN;Acc:ZDB-GENE-030131-2579]	-2.05689	0.0143323
O93548	ENSDARG00000087390	hbbe1.3	hemoglobin, beta embryonic 1.3 [Source:ZFIN;Acc:ZDB-GENE-131120-128]	-2.05155	0.0121374
Q6IQE2	ENSDARG00000044521	eef1b2	eukaryotic translation elongation factor 1 beta 2 [Source:ZFIN;Acc:ZDB-GENE-030131-7310]	-2.04973	0.0437443
Q567Y8	ENSDARG00000030224	ppp2ca	protein phosphatase 2, catalytic subunit, alpha isozyme [Source:ZFIN;Acc:ZDB-GENE-050417-441]	-2.04962	0.0394918
B3DG31	ENSDARG00000035679	si:rp71-45k5.4	si:rp71-45k5.4 [Source:ZFIN;Acc:ZDB-GENE-060503-941]	-2.04551	0.0423075
F1QAK1	ENSDARG00000020235	sept9a	septin 9a [Source:ZFIN;Acc:ZDB-GENE-030131-9187]	-2.03336	0.0159496
Q803T5	ENSDARG00000005191	ahcy	adenosylhomocysteinase [Source:ZFIN;Acc:ZDB-GENE-031219-6]	-2.03088	0.018414
E7FDV9	ENSDARG00000036164	cars1	cysteinyl-tRNA synthetase 1 [Source:ZFIN;Acc:ZDB-GENE-030328-29]	-2.02636	0.00913213
A0A2R8PZ91	ENSDARG00000105243	ogt.1	O-linked N-acetylglucosamine (GlcNAc) transferase, tandem duplicate 1 [Source:ZFIN;Acc:ZDB-GENE-030131-9631]	-2.02447	0.0327109
Q804H2	ENSDARG00000026726	anxa1a	annexin A1a [Source:ZFIN;Acc:ZDB-GENE-030131-6664]	-2.01935	0.0291671
F1QFN3	ENSDARG00000019280	lars1b	leucyl-tRNA synthetase 1b [Source:ZFIN;Acc:ZDB-GENE-030114-7]	-2.01782	0.0227688
Q8UVK2	ENSDARG00000006524	supt6h	SPT6 homolog, histone chaperone and transcription elongation factor [Source:NCBI gene;Acc:337866]	-2.01549	0.0302856
Q1LW01	ENSDARG00000019122	he1.2	hatching enzyme 1, tandem dupliate 2 [Source:ZFIN;Acc:ZDB-GENE-030131-2100]	-2.01402	0.0456042
F8W4M7	ENSDARG00000007294	aco2	aconitase 2, mitochondrial [Source:ZFIN;Acc:ZDB-GENE-030131-1390]	-2.01161	0.0184525
A0A2R8QH08	ENSDARG00000053684	aldob	aldolase b, fructose-bisphosphate [Source:NCBI gene;Acc:321664]	-2.00791	0.0157955
Q7ZUQ1	ENSDARG00000040158	cdc42l	cell division cycle 42, like [Source:ZFIN;Acc:ZDB-GENE-030131-6069]	-2.00433	0.021188
F1Q9U6	ENSDARG00000012399	adssl	adenylosuccinate synthase, like [Source:ZFIN;Acc:ZDB-GENE-020419-28]	-2.0023	0.0210725
F1QSR3	ENSDARG00000024829	tnn	tenascin N [Source:ZFIN;Acc:ZDB-GENE-990415-262]	-1.99979	0.0227303
B0V0W5	ENSDARG00000019791	prmt3	protein arginine methyltransferase 3 [Source:ZFIN;Acc:ZDB-GENE-041105-1]	-1.988	0.0371472
A5D6S3	ENSDARG00000060554	mut	methylmalonyl CoA mutase [Source:ZFIN;Acc:ZDB-GENE-010430-3]	-1.98562	0.00947869
A2BGT2	ENSDARG00000035603	dao.2	D-amino-acid oxidase, tandem duplicate 2 [Source:ZFIN;Acc:ZDB-GENE-040426-2634]	-1.97825	0.0133311
F1QE62	ENSDARG00000007959	hibadhb	3-hydroxyisobutyrate dehydrogenase b [Source:ZFIN;Acc:ZDB-GENE-040426-1582]	-1.97459	0.00967123
Q4QRJ7	ENSDARG00000101061	eif2a	eukaryotic translation initiation factor 2A [Source:NCBI gene;Acc:573991]	-1.97379	0.0267748
F1QLV5	ENSDARG00000010250	nqo1	NAD(P)H dehydrogenase, quinone 1 [Source:ZFIN;Acc:ZDB-GENE-030131-1226]	-1.971	0.0120989
Q8JHI0	ENSDARG00000092553	slc25a5	solute carrier family 25 member 5 [Source:ZFIN;Acc:ZDB-GENE-020419-9]	-1.97093	0.0179519
F1RB70	ENSDARG00000069673	chid1	chitinase domain containing 1 [Source:NCBI gene;Acc:337225]	-1.96989	0.023923
F1QCD4	ENSDARG00000005840	got2b	glutamic-oxaloacetic transaminase 2b, mitochondrial [Source:ZFIN;Acc:ZDB-GENE-030131-7917]	-1.9679	0.0417332
A0A0R4IS83	ENSDARG00000104267	postnb	periostin, osteoblast specific factor b [Source:ZFIN;Acc:ZDB-GENE-030131-9120]	-1.96463	0.0134466
Q6P0G6	ENSDARG00000014196	myl1	myosin, light chain 1, alkali; skeletal, fast [Source:ZFIN;Acc:ZDB-GENE-030131-8109]	-1.96272	0.0347561
Q8AY63	ENSDARG00000043257	ckbb	creatine kinase, brain b [Source:ZFIN;Acc:ZDB-GENE-020103-2]	-1.95076	0.0229228
F1Q6V3	ENSDARG00000017985	C1H4orf33	zgc:77739 [Source:NCBI gene;Acc:393870]	-1.94638	0.0373745
B8JLJ3	ENSDARG00000032575	ywhaz	tyrosine 3-monooxygenase/tryptophan 5-monooxygenase activation protein, zeta polypeptide [Source:ZFIN;Acc:ZDB-GENE-030131-8554]	-1.93939	0.0147944
A0A0R4IPQ8	ENSDARG00000100442	cfh	complement factor H [Source:ZFIN;Acc:ZDB-GENE-050208-661]	-1.93936	0.0330987
Q6DGX8	ENSDARG00000101560	psma1	proteasome 20S subunit alpha 1 [Source:ZFIN;Acc:ZDB-GENE-040801-15]	-1.93507	0.0159881
Q6WFZ4	ENSDARG00000029415	mtx2	metaxin 2 [Source:ZFIN;Acc:ZDB-GENE-021210-2]	-1.9286	0.023769
Q08C76	ENSDARG00000063292	ssuh2rs1	ssu-2 homolog, related sequence 1 [Source:NCBI gene;Acc:767720]	-1.92253	0.0442881
Q6NZU0	ENSDARG00000018989	hspa4b	heat shock protein 4b [Source:ZFIN;Acc:ZDB-GENE-030131-6018]	-1.91647	0.0153335
A0A2R8Q449	ENSDARG00000110698	CABZ01061524.1		-1.91126	0.0190686
Q90ZM2	ENSDARG00000021669	sec61a1	SEC61 translocon alpha 1 subunit [Source:NCBI gene;Acc:192298]	-1.90301	0.0356046
A0A2R8Q4J7	ENSDARG00000070560	nap1l4a	nucleosome assembly protein 1-like 4a [Source:ZFIN;Acc:ZDB-GENE-030131-9099]	-1.903	0.0242301
A5PMQ1	ENSDARG00000006029	lta4h	leukotriene A4 hydrolase [Source:ZFIN;Acc:ZDB-GENE-040426-2477]	-1.90271	0.0326724
A0A2R8QDT4	ENSDARG00000100304	chdh	choline dehydrogenase [Source:ZFIN;Acc:ZDB-GENE-120111-1]	-1.90032	0.0364926
Q6NYE3	ENSDARG00000018178	pgm2	phosphoglucomutase 2 [Source:ZFIN;Acc:ZDB-GENE-040426-2218]	-1.89712	0.0256171
F1R8J6	ENSDARG00000039980	ppt1	palmitoyl-protein thioesterase 1 (ceroid-lipofuscinosis, neuronal 1, infantile) [Source:ZFIN;Acc:ZDB-GENE-040426-2653]	-1.89428	0.0189916
Q803Q7	ENSDARG00000011665	aldoaa	aldolase a, fructose-bisphosphate, a [Source:ZFIN;Acc:ZDB-GENE-030131-8369]	-1.89394	0.0277013
Q6DG85	ENSDARG00000007024	uox	urate oxidase [Source:NCBI gene;Acc:436604]	-1.89126	0.0244996
F1RB36	ENSDARG00000020529	hacl1	2-hydroxyacyl-CoA lyase 1 [Source:ZFIN;Acc:ZDB-GENE-040426-2058]	-1.89119	0.011019
F1Q8A0	ENSDARG00000040251	ctsk	cathepsin K [Source:ZFIN;Acc:ZDB-GENE-001205-4]	-1.88802	0.0255025
A0A0R4IYL8	ENSDARG00000103004	tpra	translocated promoter region a, nuclear basket protein [Source:ZFIN;Acc:ZDB-GENE-081104-2]	-1.88316	0.0181059
B8JIH2	ENSDARG00000044968	vcla	vinculin a [Source:ZFIN;Acc:ZDB-GENE-050506-61]	-1.881	0.015372
Q502L2	ENSDARG00000035608	pgam5	PGAM family member 5, serine/threonine protein phosphatase, mitochondrial [Source:NCBI gene;Acc:492357]	-1.87318	0.0310188
G1K2X0	ENSDARG00000000563	ttn.1	titin, tandem duplicate 1 [Source:ZFIN;Acc:ZDB-GENE-030616-413]	-1.87144	0.0102103
F1QSP4	ENSDARG00000057853	atp6v0ca	ATPase H+ transporting V0 subunit ca [Source:ZFIN;Acc:ZDB-GENE-020419-23]	-1.86845	0.0164116
Q08BA1	ENSDARG00000010149	atp5fa1	ATP synthase F1 subunit alpha [Source:ZFIN;Acc:ZDB-GENE-060201-1]	-1.86732	0.0241916
Q9DGL6	ENSDARG00000002791	atp1a1a.1	ATPase Na+/K+ transporting subunit alpha 1a, tandem duplicate 1 [Source:ZFIN;Acc:ZDB-GENE-001212-1]	-1.86392	0.0217271
B0S5S6	ENSDARG00000069242	pdia5	protein disulfide isomerase family A, member 5 [Source:ZFIN;Acc:ZDB-GENE-030521-5]	-1.85482	0.0162576
F1RCN0	ENSDARG00000030756	dnmt1	DNA (cytosine-5-)-methyltransferase 1 [Source:ZFIN;Acc:ZDB-GENE-990714-15]	-1.84089	0.0131001
A9ULS7	ENSDARG00000063288	slc2a11b	solute carrier family 2 member 11b [Source:NCBI gene;Acc:564970]	-1.83118	0.0160651
Q7T306	ENSDARG00000040565	ckmb	creatine kinase, muscle b [Source:ZFIN;Acc:ZDB-GENE-040426-2128]	-1.83095	0.0102873
F8W4Q1	ENSDARG00000022309	dspa	desmoplakin a [Source:ZFIN;Acc:ZDB-GENE-030131-2743]	-1.83058	0.0181444
F8W411	ENSDARG00000038917	rad50	RAD50 homolog, double strand break repair protein [Source:ZFIN;Acc:ZDB-GENE-050506-110]	-1.82111	0.018645
B3DKJ9	ENSDARG00000027689	pold1	polymerase (DNA directed), delta 1, catalytic subunit [Source:ZFIN;Acc:ZDB-GENE-060429-1]	-1.81715	0.0296677
F1Q6F3	ENSDARG00000039516	c8a	complement component 8, alpha polypeptide [Source:ZFIN;Acc:ZDB-GENE-040801-239]	-1.81191	0.0382995
A0A0R4IV67	ENSDARG00000103811	agla	amylo-alpha-1, 6-glucosidase, 4-alpha-glucanotransferase a [Source:ZFIN;Acc:ZDB-GENE-071004-6]	-1.80813	0.0101333
Q6DBR7	ENSDARG00000030176	zgc:92429	zgc:92429 [Source:ZFIN;Acc:ZDB-GENE-040801-194]	-1.80641	0.0151794
Q642H6	ENSDARG00000040248	crata	carnitine O-acetyltransferase a [Source:ZFIN;Acc:ZDB-GENE-040927-17]	-1.80638	0.0225377
A0A286YBH9	ENSDARG00000075016	apobb.2	apolipoprotein Bb, tandem duplicate 2 [Source:ZFIN;Acc:ZDB-GENE-070705-554]	-1.80187	0.0107879
A0A0R4IIH9	ENSDARG00000095947	adkb	adenosine kinase b [Source:ZFIN;Acc:ZDB-GENE-030131-948]	-1.80177	0.0186835
F1Q6N0	ENSDARG00000012261	eftud2	elongation factor Tu GTP binding domain containing 2 [Source:ZFIN;Acc:ZDB-GENE-040426-1569]	-1.7981	0.0361069
Q66I16	ENSDARG00000038834	etfdh	electron transfer flavoprotein dehydrogenase [Source:ZFIN;Acc:ZDB-GENE-040912-168]	-1.79733	0.0251927
F1QYU0	ENSDARG00000020785	lama4	laminin, alpha 4 [Source:ZFIN;Acc:ZDB-GENE-040724-213]	-1.79528	0.0319814
F1R442	ENSDARG00000069966	alox5b.3	arachidonate 5-lipoxygenase b, tandem duplicate 3 [Source:ZFIN;Acc:ZDB-GENE-050522-330]	-1.79354	0.0292826
F6P2R4	ENSDARG00000005643	gcat	glycine C-acetyltransferase [Source:ZFIN;Acc:ZDB-GENE-060518-3]	-1.79303	0.0180674
Q7ZW04	ENSDARG00000039605	mat1a	methionine adenosyltransferase I, alpha [Source:ZFIN;Acc:ZDB-GENE-030131-6127]	-1.79226	0.0278168
Q6PE25	ENSDARG00000056119	eef1g	eukaryotic translation elongation factor 1 gamma [Source:NCBI gene;Acc:195822]	-1.78387	0.0187606
A0A2R8RUM2	ENSDARG00000058660	ilf3a	interleukin enhancer binding factor 3a [Source:ZFIN;Acc:ZDB-GENE-030131-3151]	-1.78209	0.0214191
A2CEW3	ENSDARG00000006526	fn1b	fibronectin 1b [Source:ZFIN;Acc:ZDB-GENE-030131-6545]	-1.77633	0.0138702
A0A2R8QJS5	ENSDARG00000113905	rae1	ribonucleic acid export 1 [Source:NCBI gene;Acc:393973]	-1.76122	0.018722
Q6P3J9	ENSDARG00000039429	adka	adenosine kinase a [Source:ZFIN;Acc:ZDB-GENE-030425-3]	-1.75959	0.0197613
A0A0R4ILN2	ENSDARG00000098831	gcdhb	glutaryl-CoA dehydrogenase b [Source:ZFIN;Acc:ZDB-GENE-041010-117]	-1.75907	0.0235764
Q6IQX1	ENSDARG00000012944	myhz2	myosin, heavy polypeptide 2, fast muscle specific [Source:ZFIN;Acc:ZDB-GENE-020604-1]	-1.75625	0.0169892
F1QB54	ENSDARG00000017219	pabpc1a	poly(A) binding protein, cytoplasmic 1a [Source:ZFIN;Acc:ZDB-GENE-030131-3238]	-1.75134	0.0245381
F1QHC4	ENSDARG00000044299	lmnb1	lamin B1 [Source:ZFIN;Acc:ZDB-GENE-020424-2]	-1.74504	0.0238845
Q6TH15	ENSDARG00000021257	eif3d	eukaryotic translation initiation factor 3, subunit D [Source:NCBI gene;Acc:336498]	-1.74277	0.0178749
F1QZU7	ENSDARG00000028087	aldh2.2	aldehyde dehydrogenase 2 family member, tandem duplicate 2 [Source:ZFIN;Acc:ZDB-GENE-030326-5]	-1.74191	0.0245766
F1QG82	ENSDARG00000038066	kpna2	karyopherin alpha 2 (RAG cohort 1, importin alpha 1) [Source:ZFIN;Acc:ZDB-GENE-040718-22]	-1.73759	0.0281652
X1WG39	ENSDARG00000092644	ago1	argonaute RISC component 1 [Source:ZFIN;Acc:ZDB-GENE-110606-3]	-1.73275	0.0173358
A0A140LG01	ENSDARG00000069977	C11H12orf10	melanocyte proliferating gene 1 [Source:ZFIN;Acc:ZDB-GENE-060312-32]	-1.72768	0.0123299
A0A0R4IPH8	ENSDARG00000100374	txnrd3	thioredoxin reductase 3 [Source:ZFIN;Acc:ZDB-GENE-030327-3]	-1.72758	0.0178364
Q5XJ10	ENSDARG00000043457	gapdh	glyceraldehyde-3-phosphate dehydrogenase [Source:NCBI gene;Acc:317743]	-1.72181	0.03749
Q7ZUJ8	ENSDARG00000013938	psmb3	proteasome 20S subunit beta 3 [Source:ZFIN;Acc:ZDB-GENE-040426-2682]	-1.71622	0.0352557
Q5RKM3	ENSDARG00000004906	stip1	stress-induced phosphoprotein 1 [Source:ZFIN;Acc:ZDB-GENE-041121-17]	-1.71369	0.0183755
A0A2R8Q860	ENSDARG00000068992	hspa8	heat shock protein 8 [Source:NCBI gene;Acc:573376]	-1.71236	0.0371087
Q6AZA2	ENSDARG00000036438	ndufv1	NADH:ubiquinone oxidoreductase core subunit V1 [Source:ZFIN;Acc:ZDB-GENE-040808-73]	-1.71037	0.0359126
F1QPU3	ENSDARG00000053518	adhfe1	alcohol dehydrogenase iron containing 1 [Source:ZFIN;Acc:ZDB-GENE-040426-2070]	-1.71006	0.0401083
Q7T334	ENSDARG00000043371	mdh2	malate dehydrogenase 2, NAD (mitochondrial) [Source:ZFIN;Acc:ZDB-GENE-040426-2143]	-1.70919	0.0216501
A0A0R4IM99	ENSDARG00000104682	tpm2	tropomyosin 2 (beta) [Source:ZFIN;Acc:ZDB-GENE-040625-114]	-1.70569	0.01568
Q6TNW3	ENSDARG00000007216	abce1	ATP-binding cassette, sub-family E (OABP), member 1 [Source:ZFIN;Acc:ZDB-GENE-040426-1995]	-1.70098	0.0318274
F1QFQ7	ENSDARG00000076780	acadsb	acyl-CoA dehydrogenase short/branched chain [Source:ZFIN;Acc:ZDB-GENE-070410-109]	-1.69222	0.0126765
A0A286YAH8	ENSDARG00000069142	aars1	alanyl-tRNA synthetase 1 [Source:ZFIN;Acc:ZDB-GENE-030131-3663]	-1.69073	0.0164502
F6NXD5	ENSDARG00000008803	marcksb	myristoylated alanine-rich protein kinase C substrate b [Source:ZFIN;Acc:ZDB-GENE-030131-1921]	-1.68936	0.0283952
Q5PRD0	ENSDARG00000013078	ywhaba	tyrosine 3-monooxygenase/tryptophan 5-monooxygenase activation protein, beta polypeptide a [Source:NCBI gene;Acc:323055]	-1.6853	0.0315964
A0A2R8Q0G4	ENSDARG00000115805	GGT7	gamma-glutamyltransferase 7 [Source:NCBI gene;Acc:101882295]	-1.68477	0.0207645
A0A140LG76	ENSDARG00000038207	aldh4a1	aldehyde dehydrogenase 4 family, member A1 [Source:NCBI gene;Acc:394133]	-1.67896	0.0204949
A0A2R8QHT3	ENSDARG00000115260	CT027552.1	ubiquitin protein ligase E3 component n-recognin 4 [Source:NCBI gene;Acc:407625]	-1.67823	0.0316349
F1QP99	ENSDARG00000014015	pdia7	protein disulfide isomerase family A, member 7 [Source:ZFIN;Acc:ZDB-GENE-040426-2238]	-1.67798	0.0349101
Q802Z5	ENSDARG00000020482	nono	non-POU domain containing, octamer-binding [Source:ZFIN;Acc:ZDB-GENE-030131-713]	-1.67663	0.0125995
Q803M8	ENSDARG00000023323	ywhaqb	tyrosine 3-monooxygenase/tryptophan 5-monooxygenase activation protein, theta polypeptide b [Source:ZFIN;Acc:ZDB-GENE-030131-7135]	-1.67279	0.0258096
O42248	ENSDARG00000041619	rack1	receptor for activated C kinase 1 [Source:NCBI gene;Acc:30722]	-1.66244	0.0280111
F8W3L6	ENSDARG00000063295	myh9a	myosin, heavy chain 9a, non-muscle [Source:ZFIN;Acc:ZDB-GENE-030131-5870]	-1.65787	0.0122529
E7FG81	ENSDARG00000019601	col12a1b	collagen, type XII, alpha 1b [Source:ZFIN;Acc:ZDB-GENE-120215-116]	-1.65724	0.0290516
F1Q7N2	ENSDARG00000103317	capn5a	calpain 5a [Source:ZFIN;Acc:ZDB-GENE-061103-214]	-1.65644	0.015757
F1RBF6	ENSDARG00000075758	ywhabb	tyrosine 3-monooxygenase/tryptophan 5-monooxygenase activation protein, beta polypeptide b [Source:NCBI gene;Acc:406419]	-1.65627	0.0249617
X1WEJ6	ENSDARG00000078592	nomo	nodal modulator [Source:ZFIN;Acc:ZDB-GENE-040826-3]	-1.65485	0.034526
F1QQE5	ENSDARG00000030490	sptb	spectrin, beta, erythrocytic [Source:ZFIN;Acc:ZDB-GENE-000906-1]	-1.65245	0.0122914
A0A0G2L1F5	ENSDARG00000102883	sptbn1	spectrin, beta, non-erythrocytic 1 [Source:ZFIN;Acc:ZDB-GENE-031006-3]	-1.65108	0.0223047
F1Q9K1	ENSDARG00000017397	smarcc1a	SWI/SNF related, matrix associated, actin dependent regulator of chromatin, subfamily c, member 1a [Source:ZFIN;Acc:ZDB-GENE-080514-3]	-1.6445	0.0377981
B0S5C5	ENSDARG00000038881	acaa2	acetyl-CoA acyltransferase 2 [Source:ZFIN;Acc:ZDB-GENE-040426-1996]	-1.64422	0.0408798
Q5CZR5	ENSDARG00000039099	aep1	aerolysin-like protein [Source:NCBI gene;Acc:503710]	-1.64343	0.00982525
B8A4C4	ENSDARG00000060252	mogs	mannosyl-oligosaccharide glucosidase [Source:ZFIN;Acc:ZDB-GENE-070112-412]	-1.64105	0.0179134
A9JT23	ENSDARG00000031814	dhrs13b.1	dehydrogenase/reductase (SDR family) member 13b.1 [Source:ZFIN;Acc:ZDB-GENE-040801-253]	-1.64092	0.0310958
A3KQK2	ENSDARG00000016375	asns	asparagine synthetase [Source:ZFIN;Acc:ZDB-GENE-040426-1091]	-1.63025	0.0314038
Q6NW47	ENSDARG00000032405	ckap4	cytoskeleton associated protein 4 [Source:ZFIN;Acc:ZDB-GENE-040426-2417]	-1.62608	0.0117138
Q1L8P1	ENSDARG00000005023	fkbp9	FKBP prolyl isomerase 9 [Source:ZFIN;Acc:ZDB-GENE-040801-23]	-1.6178	0.0107109
Q7ZTX2	ENSDARG00000016903	wdr5	WD repeat domain 5 [Source:ZFIN;Acc:ZDB-GENE-040426-2082]	-1.61324	0.0236919
Q7T337	ENSDARG00000020364	fbp1b	fructose-1,6-bisphosphatase 1b [Source:ZFIN;Acc:ZDB-GENE-021206-11]	-1.60469	0.0152564
Q567K2	ENSDARG00000019496	esd	esterase D/formylglutathione hydrolase [Source:ZFIN;Acc:ZDB-GENE-050417-328]	-1.60267	0.0282797
F8W5L3	ENSDARG00000078425	oat	ornithine aminotransferase [Source:ZFIN;Acc:ZDB-GENE-110411-148]	-1.60094	0.0268518
Q802C8	ENSDARG00000019004	smarcd1	SWI/SNF related, matrix associated, actin dependent regulator of chromatin, subfamily d, member 1 [Source:ZFIN;Acc:ZDB-GENE-030131-1835]	-1.60062	0.0311343
E7F333	ENSDARG00000099911	lrrc8c	leucine rich repeat containing 8 VRAC subunit C [Source:ZFIN;Acc:ZDB-GENE-030131-2965]	-1.59609	0.0240375
B0S6C5	ENSDARG00000034989	retsatl	retinol saturase (all-trans-retinol 13,14-reductase) like [Source:NCBI gene;Acc:677660]	-1.5949	0.0248077
Q803X7	ENSDARG00000101813	nap1l1	nucleosome assembly protein 1-like 1 [Source:ZFIN;Acc:ZDB-GENE-030516-2]	-1.58966	0.0231153
A0A0R4IHV6	ENSDARG00000040650	gps1	G protein pathway suppressor 1 [Source:ZFIN;Acc:ZDB-GENE-041111-240]	-1.58965	0.0135237
A0A0R4IPV5	ENSDARG00000105116	p4hb	prolyl 4-hydroxylase, beta polypeptide [Source:ZFIN;Acc:ZDB-GENE-080610-1]	-1.58601	0.0406454
Q7T2C6	ENSDARG00000020497	rab7a	RAB7a, member RAS oncogene family [Source:ZFIN;Acc:ZDB-GENE-040426-1352]	-1.57922	0.0346405
A8E5J9	ENSDARG00000039929	ckmt2b	creatine kinase, mitochondrial 2b (sarcomeric) [Source:ZFIN;Acc:ZDB-GENE-040426-1654]	-1.57123	0.0164887
A2CG10	ENSDARG00000016128	ap3m2	adaptor related protein complex 3 subunit mu 2 [Source:ZFIN;Acc:ZDB-GENE-021022-2]	-1.57029	0.0435117
F1RAG3	ENSDARG00000068710	nid1a	nidogen 1a [Source:ZFIN;Acc:ZDB-GENE-050302-58]	-1.56892	0.0305936
B8JMZ1	ENSDARG00000005578	ugp2a	UDP-glucose pyrophosphorylase 2a [Source:ZFIN;Acc:ZDB-GENE-090311-46]	-1.5647	0.0162961
A0A0R4IHV1	ENSDARG00000099860	pkmb	pyruvate kinase M1/2b [Source:ZFIN;Acc:ZDB-GENE-040801-230]	-1.55246	0.0127535
Q6GMG5	ENSDARG00000042336	impdh1a	IMP (inosine 5'-monophosphate) dehydrogenase 1a [Source:NCBI gene;Acc:431724]	-1.55108	0.0169122
A5PMV7	ENSDARG00000007791	ppp2r1ba	protein phosphatase 2, regulatory subunit A, beta a [Source:ZFIN;Acc:ZDB-GENE-040426-2700]	-1.54937	0.04138
Q66I42	ENSDARG00000058128	msna	moesin a [Source:ZFIN;Acc:ZDB-GENE-021211-2]	-1.54737	0.0188376
Q568V3	ENSDARG00000035326	nccrp1	P1, F-box associated domain containing [Source:NCBI gene;Acc:30078]	-1.54162	0.0112115
Q6DHE6	ENSDARG00000103799	kars1	lysyl-tRNA synthetase 1 [Source:ZFIN;Acc:ZDB-GENE-021115-8]	-1.54121	0.0261167
F1QXB0	ENSDARG00000053956	sptbn2	spectrin, beta, non-erythrocytic 2 [Source:ZFIN;Acc:ZDB-GENE-030131-787]	-1.53383	0.0257711
F1Q890	ENSDARG00000023111	plg	plasminogen [Source:ZFIN;Acc:ZDB-GENE-030131-1411]	-1.53303	0.0215731
F1QWR0	ENSDARG00000020387	nipsnap3a	nipsnap homolog 3A (C. elegans) [Source:ZFIN;Acc:ZDB-GENE-040426-1037]	-1.53016	0.0193776
Q803U3	ENSDARG00000039490	pitpnaa	phosphatidylinositol transfer protein, alpha a [Source:ZFIN;Acc:ZDB-GENE-040426-744]	-1.52808	0.0225762
F1QET7	ENSDARG00000059680	fscn1a	fascin actin-bundling protein 1a [Source:ZFIN;Acc:ZDB-GENE-031009-1]	-1.52702	0.0155645
A0A0R4ISN6	ENSDARG00000098831	gcdhb	glutaryl-CoA dehydrogenase b [Source:ZFIN;Acc:ZDB-GENE-041010-117]	-1.52395	0.0151024
Q1L9A1	ENSDARG00000040564	hnrnpul1	heterogeneous nuclear ribonucleoprotein U-like 1 [Source:ZFIN;Acc:ZDB-GENE-040426-2432]	-1.51777	0.0435502
B3DJJ8	ENSDARG00000063341	czib	CXXC motif containing zinc binding protein [Source:ZFIN;Acc:ZDB-GENE-061207-34]	-1.51721	0.0409558
Q6NV37	ENSDARG00000011934	gyg1a	glycogenin 1a [Source:ZFIN;Acc:ZDB-GENE-040426-2910]	-1.51499	0.0391433
Q6DHT4	ENSDARG00000053485	aldh6a1	aldehyde dehydrogenase 6 family, member A1 [Source:ZFIN;Acc:ZDB-GENE-030131-9192]	-1.51415	0.0224588
Q6P0I2	ENSDARG00000010965	psma8	proteasome 20S subunit alpha 8 [Source:ZFIN;Acc:ZDB-GENE-040426-2194]	-1.50901	0.0137932
Q5NJJ5	ENSDARG00000015947	matn4	matrilin 4 [Source:ZFIN;Acc:ZDB-GENE-050208-64]	-1.50757	0.0115598
A2BIM7	ENSDARG00000013250	tars1	threonyl-tRNA synthetase 1 [Source:ZFIN;Acc:ZDB-GENE-041010-218]	-1.50728	0.0266208
X1WH50	ENSDARG00000078748	si:ch211-137a8.4	si:ch211-137a8.4 [Source:ZFIN;Acc:ZDB-GENE-030131-3742]	-1.50645	0.0432803
F1QJK2	ENSDARG00000032606	sept8a	septin 8a [Source:NCBI gene;Acc:321590]	-1.49423	0.0280496
B8A5D4	ENSDARG00000011921	txnl1	thioredoxin-like 1 [Source:ZFIN;Acc:ZDB-GENE-040426-701]	-1.4888	0.0265438
F1QC05	ENSDARG00000042854	ephx1	epoxide hydrolase 1, microsomal (xenobiotic) [Source:ZFIN;Acc:ZDB-GENE-040426-913]	-1.48834	0.0259242
O57521	ENSDARG00000029150	hsp90ab1	heat shock protein 90, alpha (cytosolic), class A member 1, tandem duplicate 2 [Source:ZFIN;Acc:ZDB-GENE-031001-3]	-1.4881	0.0190301
B7ZUU8	ENSDARG00000071424	ap3d1	adaptor related protein complex 3 subunit delta 1 [Source:ZFIN;Acc:ZDB-GENE-050208-437]	-1.47209	0.0464183
Q9PT92	ENSDARG00000104702	cat	catalase [Source:NCBI gene;Acc:30068]	-1.46981	0.0214961
Q5U3T4	ENSDARG00000027649	cpsf3	cleavage and polyadenylation specific factor 3 [Source:ZFIN;Acc:ZDB-GENE-030131-3275]	-1.46958	0.0141398
A0A0R4IPQ7	ENSDARG00000111819	44080	septin 6 [Source:ZFIN;Acc:ZDB-GENE-030131-1414]	-1.46532	0.0266593
A0A0R4I9F5	ENSDARG00000037318	ddost	dolichyl-diphosphooligosaccharide--protein glycosyltransferase subunit (non-catalytic) [Source:NCBI gene;Acc:406408]	-1.46073	0.0299775
Q9PVK5	ENSDARG00000101251	ldha	lactate dehydrogenase A4 [Source:NCBI gene;Acc:30496]	-1.4601	0.0172203
A0A0R4IPL8	ENSDARG00000102456	cfhl4	complement factor H like 4 [Source:ZFIN;Acc:ZDB-GENE-030131-251]	-1.45915	0.0327494
Q5U3A4	ENSDARG00000020574	atp2a1	ATPase sarcoplasmic/endoplasmic reticulum Ca2+ transporting 1 [Source:ZFIN;Acc:ZDB-GENE-020905-1]	-1.45519	0.0119064
F1RD28	ENSDARG00000030357	zgc:66313	zgc:66313 [Source:ZFIN;Acc:ZDB-GENE-040426-1606]	-1.45339	0.0293597
A0A2R8Q720	ENSDARG00000112613	CR352234.2	filamin A, alpha (actin binding protein 280) [Source:NCBI gene;Acc:562529]	-1.4521	0.0270059
F1QK18	ENSDARG00000057973	dph1	diphthamide biosynthesis 1 [Source:NCBI gene;Acc:550559]	-1.45199	0.0226147
F1QU35	ENSDARG00000059046	psmd5	proteasome 26S subunit, non-ATPase 5 [Source:ZFIN;Acc:ZDB-GENE-050417-28]	-1.45001	0.0139472
Q6P5K3	ENSDARG00000051783	rplp0	ribosomal protein, large, P0 [Source:NCBI gene;Acc:58101]	-1.44403	0.0105954
F1QM44	ENSDARG00000054786	faah2b	fatty acid amide hydrolase 2b [Source:NCBI gene;Acc:768298]	-1.43872	0.0403006
F1QC64	ENSDARG00000001014	myh9b	myosin, heavy chain 9b, non-muscle [Source:ZFIN;Acc:ZDB-GENE-030131-998]	-1.43614	0.0130231
A0A2R8RPQ9	ENSDARG00000115676	ptgr1	prostaglandin reductase 1 [Source:ZFIN;Acc:ZDB-GENE-041212-80]	-1.43444	0.018491
Q803G3	ENSDARG00000099241	ppp2cb	protein phosphatase 2, catalytic subunit, beta isozyme [Source:ZFIN;Acc:ZDB-GENE-040426-2487]	-1.43358	0.0223432
Q6AXI7	ENSDARG00000030781	acads	acyl-CoA dehydrogenase short chain [Source:ZFIN;Acc:ZDB-GENE-040808-64]	-1.42599	0.0154105
B8JI08	ENSDARG00000034270	ogdha	oxoglutarate (alpha-ketoglutarate) dehydrogenase a (lipoamide) [Source:ZFIN;Acc:ZDB-GENE-030131-2143]	-1.41304	0.0371857
A9JRY8	ENSDARG00000020795	rac3b	Rac family small GTPase 3b [Source:ZFIN;Acc:ZDB-GENE-080220-21]	-1.40333	0.0438599
Q6P3L6	ENSDARG00000015709	hsd17b12a	hydroxysteroid (17-beta) dehydrogenase 12a [Source:NCBI gene;Acc:327417]	-1.4007	0.0275858
A0A0R4II89	ENSDARG00000104702	cat	catalase [Source:NCBI gene;Acc:30068]	-1.39815	0.0108649
Q92051	ENSDARG00000011166	cahz	carbonic anhydrase [Source:NCBI gene;Acc:30331]	-1.39776	0.0275473
F8W2D1	ENSDARG00000008447	fkbp4	FKBP prolyl isomerase 4 [Source:ZFIN;Acc:ZDB-GENE-030131-514]	-1.39314	0.0206104
Q5RH26	ENSDARG00000045514	atp5f1c	ATP synthase F1 subunit gamma [Source:ZFIN;Acc:ZDB-GENE-030131-8901]	-1.39204	0.0365311
Q503C7	ENSDARG00000055518	pygma	phosphorylase, glycogen, muscle A [Source:ZFIN;Acc:ZDB-GENE-050522-482]	-1.38322	0.0273155
E7FFM8	ENSDARG00000073905	vwa5a	von Willebrand factor A domain containing 5A [Source:ZFIN;Acc:ZDB-GENE-040912-181]	-1.38218	0.0270829
Q7SXP1	ENSDARG00000100252	capzb	capping actin protein of muscle Z-line subunit beta [Source:ZFIN;Acc:ZDB-GENE-030131-7023]	-1.37575	0.0319429
Q6YI49	ENSDARG00000026871	uchl1	ubiquitin carboxyl-terminal esterase L1 (ubiquitin thiolesterase) [Source:ZFIN;Acc:ZDB-GENE-030131-3844]	-1.37119	0.0353712
Q7T3G2	ENSDARG00000005560	ywhah	tyrosine 3-monooxygenase/tryptophan 5-monooxygenase activation protein, eta polypeptide [Source:ZFIN;Acc:ZDB-GENE-040426-2191]	-1.36998	0.0352172
Q803M1	ENSDARG00000005162	tpm3	tropomyosin 3 [Source:ZFIN;Acc:ZDB-GENE-030826-16]	-1.3699	0.0418862
A0A286Y8E9	ENSDARG00000029011	xpnpep1	X-prolyl aminopeptidase (aminopeptidase P) 1, soluble [Source:ZFIN;Acc:ZDB-GENE-040426-999]	-1.36549	0.0109034
F1R4U0	ENSDARG00000076381	slc25a1b	slc25a1 solute carrier family 25 member 1b [Source:NCBI gene;Acc:795332]	-1.35964	0.0305166
Q6NSN6	ENSDARG00000003486	ppp1caa	protein phosphatase 1, catalytic subunit, alpha isozyme a [Source:ZFIN;Acc:ZDB-GENE-040516-3]	-1.35555	0.0463038
A4IGC8	ENSDARG00000099579	aldh18a1	aldehyde dehydrogenase 18 family, member A1 [Source:ZFIN;Acc:ZDB-GENE-030131-5602]	-1.35305	0.0446785
A0A2R8PVJ3	ENSDARG00000114022	WDR1	WD repeat domain 1 [Source:HGNC Symbol;Acc:HGNC:12754]	-1.35082	0.0269674
Q6P0W3	ENSDARG00000005162	tpm3	tropomyosin 3 [Source:ZFIN;Acc:ZDB-GENE-030826-16]	-1.34923	0.029939
B0UYA3	ENSDARG00000003675	cryl1	crystallin, lambda 1 [Source:ZFIN;Acc:ZDB-GENE-060810-7]	-1.34037	0.0322506
Q8JFV8	ENSDARG00000056481	vat1	vesicle amine transport 1 [Source:NCBI gene;Acc:368752]	-1.33548	0.0385305
Q7SZC2	ENSDARG00000006963	cse1l	CSE1 chromosome segregation 1-like (yeast) [Source:NCBI gene;Acc:30707]	-1.32898	0.0379906
A2CEW4	ENSDARG00000016706	atic	5-aminoimidazole-4-carboxamide ribonucleotide formyltransferase/IMP cyclohydrolase [Source:ZFIN;Acc:ZDB-GENE-011212-4]	-1.32692	0.0399158
F1R2U1	ENSDARG00000039681	samm50l	sorting and assembly machinery component 50 homolog, like [Source:NCBI gene;Acc:492471]	-1.32063	0.0208415
B0S4Z5	ENSDARG00000003564	dohh	deoxyhypusine hydroxylase/monooxygenase [Source:NCBI gene;Acc:321732]	-1.32055	0.0347946
F1QVB1	ENSDARG00000024877	ptgr1	prostaglandin reductase 1 [Source:ZFIN;Acc:ZDB-GENE-041212-80]	-1.32027	0.045026
B0S6B9	ENSDARG00000019596	nrd1a	nardilysin a (N-arginine dibasic convertase) [Source:ZFIN;Acc:ZDB-GENE-070912-417]	-1.31606	0.0347176
Q7ZUP0	ENSDARG00000006487	anp32a	acidic (leucine-rich) nuclear phosphoprotein 32 family, member A [Source:NCBI gene;Acc:335907]	-1.31551	0.0354505
A0A0R4IYU4	ENSDARG00000103135	stoml2	stomatin (EPB72)-like 2 [Source:ZFIN;Acc:ZDB-GENE-040426-1139]	-1.31368	0.025387
Q6QA33	ENSDARG00000035872	hsd17b12b	hydroxysteroid (17-beta) dehydrogenase 12b [Source:NCBI gene;Acc:322626]	-1.30803	0.0320199
F1QAU9	ENSDARG00000076673	dspb	desmoplakin b [Source:ZFIN;Acc:ZDB-GENE-030131-1662]	-1.29951	0.0288976
A0A2R8Q157	ENSDARG00000040890	fdps	farnesyl diphosphate synthase (farnesyl pyrophosphate synthetase, dimethylallyltranstransferase, geranyltranstransferase) [Source:ZFIN;Acc:ZDB-GENE-050506-78]	-1.29916	0.0339091
E9QBV1	ENSDARG00000090716	cltcb	clathrin, heavy chain b (Hc) [Source:ZFIN;Acc:ZDB-GENE-050227-12]	-1.29786	0.0161036
Q6P102	ENSDARG00000040287	ywhabl	tyrosine 3-monooxygenase/tryptophan 5-monooxygenase activation protein, beta polypeptide like [Source:ZFIN;Acc:ZDB-GENE-030131-448]	-1.2965	0.0297062
B0R197	ENSDARG00000003695	vdac3	voltage-dependent anion channel 3 [Source:ZFIN;Acc:ZDB-GENE-040426-2380]	-1.29622	0.0392189
F1Q6S1	ENSDARG00000012871	npepl1	aminopeptidase like 1 [Source:ZFIN;Acc:ZDB-GENE-050417-177]	-1.27975	0.0229998
E9QFE1	ENSDARG00000073732	myh14	myosin, heavy chain 14, non-muscle [Source:ZFIN;Acc:ZDB-GENE-100921-1]	-1.27807	0.0488335
A0A0R4IQE9	ENSDARG00000025703	dmgdh	dimethylglycine dehydrogenase [Source:ZFIN;Acc:ZDB-GENE-080227-8]	-1.27746	0.015834
A0A0R4ILA8	ENSDARG00000007141	psmc3	proteasome 26S subunit, ATPase 3 [Source:ZFIN;Acc:ZDB-GENE-030131-666]	-1.27302	0.021111
F1Q713	ENSDARG00000053405	sord	sorbitol dehydrogenase [Source:ZFIN;Acc:ZDB-GENE-040426-1231]	-1.27189	0.0250772
Q1L960	ENSDARG00000015445	lim2.4	lens intrinsic membrane protein 2.4 [Source:ZFIN;Acc:ZDB-GENE-040718-104]	-1.25677	0.0463423
Q9DDU5	ENSDARG00000104068	gstp1	glutathione S-transferase pi 1 [Source:ZFIN;Acc:ZDB-GENE-020806-4]	-1.25588	0.0364156
Q6DI20	ENSDARG00000020676	dpp3	dipeptidyl-peptidase 3 [Source:ZFIN;Acc:ZDB-GENE-030131-1247]	-1.25582	0.0182215
A0A2R8Q8V9	ENSDARG00000109443	EML4	echinoderm microtubule associated protein like 4 [Source:NCBI gene;Acc:100334728]	-1.25149	0.026234
F1QXV8	ENSDARG00000054191	pgk1	phosphoglycerate kinase 1 [Source:ZFIN;Acc:ZDB-GENE-040426-2711]	-1.246	0.0204179
F1Q8Q6	ENSDARG00000062085	tkfc	triokinase/FMN cyclase [Source:ZFIN;Acc:ZDB-GENE-060929-652]	-1.2455	0.020726
A0A0R4IK10	ENSDARG00000113415	f11r.1	F11 receptor, tandem duplicate 1 [Source:ZFIN;Acc:ZDB-GENE-030131-2416]	-1.24195	0.0198384
A0A0R4IK06	ENSDARG00000061013	ankfy1	ankyrin repeat and FYVE domain containing 1 [Source:ZFIN;Acc:ZDB-GENE-041222-1]	-1.23843	0.0252697
Q6P3L0	ENSDARG00000021242	mvp	major vault protein [Source:NCBI gene;Acc:373081]	-1.23752	0.0121759
Q1LVL5	ENSDARG00000026835	slc25a32b	solute carrier family 25 member 32b [Source:ZFIN;Acc:ZDB-GENE-050306-39]	-1.22754	0.0311728
F1Q6Z6	ENSDARG00000075923	txnrd2.2	thioredoxin reductase 2, tandem duplicate 2 [Source:ZFIN;Acc:ZDB-GENE-040914-66]	-1.22754	0.0283182
B3DH85	ENSDARG00000056181	ncam1a	neural cell adhesion molecule 1a [Source:ZFIN;Acc:ZDB-GENE-990415-31]	-1.22747	0.0337936
F1R9Z1	ENSDARG00000114958	zp3	zona pellucida glycoprotein 3 [Source:ZFIN;Acc:ZDB-GENE-991129-7]	-1.22442	0.0447555
F6NW82	ENSDARG00000036479	si:dkeyp-80c12.4	si:dkeyp-80c12.4 [Source:ZFIN;Acc:ZDB-GENE-090313-403]	-1.21954	0.0242686
F1QGH7	ENSDARG00000014571	ctnnb1	catenin (cadherin-associated protein), beta 1 [Source:NCBI gene;Acc:30265]	-1.21951	0.0174128
F1QS28	ENSDARG00000089302	hnrnpa0a	heterogeneous nuclear ribonucleoprotein A0a [Source:ZFIN;Acc:ZDB-GENE-030131-2249]	-1.21724	0.0236149
F1R7N8	ENSDARG00000028213	ttn.2	titin, tandem duplicate 2 [Source:ZFIN;Acc:ZDB-GENE-030113-2]	-1.21435	0.0149484
A0A2R8Q784	ENSDARG00000070822	cnp	2',3'-cyclic nucleotide 3' phosphodiesterase [Source:ZFIN;Acc:ZDB-GENE-030521-29]	-1.21394	0.0170663
A0A2R8QLL5	ENSDARG00000013670	hyou1	hypoxia up-regulated 1 [Source:NCBI gene;Acc:327133]	-1.21349	0.0267363
B3DIV2	ENSDARG00000053232	itgb1b.1	integrin, beta 1b.1 [Source:ZFIN;Acc:ZDB-GENE-060803-3]	-1.20716	0.0258857
Q6NX10	ENSDARG00000027355	slc25a4	solute carrier family 25 member 4 [Source:ZFIN;Acc:ZDB-GENE-030131-5275]	-1.20575	0.0386061
F1QZ40	ENSDARG00000007421	ftcd	formimidoyltransferase cyclodeaminase [Source:ZFIN;Acc:ZDB-GENE-030131-9643]	-1.20062	0.0343335
Q6P5K6	ENSDARG00000040401	slc25a20	solute carrier family 25 member 20 [Source:ZFIN;Acc:ZDB-GENE-040426-1869]	-1.19977	0.0297832
F1QK93	ENSDARG00000003189	psmd1	proteasome 26S subunit, non-ATPase 1 [Source:ZFIN;Acc:ZDB-GENE-040426-810]	-1.19789	0.0402621
A0A140LG49	ENSDARG00000042056	mau2	MAU2 sister chromatid cohesion factor [Source:ZFIN;Acc:ZDB-GENE-050522-383]	-1.19353	0.0213806
Q6DI37	ENSDARG00000044492	ublcp1	ubiquitin-like domain containing CTD phosphatase 1 [Source:NCBI gene;Acc:792145]	-1.18829	0.0300545
Q6YBS2	ENSDARG00000016350	cap1	CAP, adenylate cyclase-associated protein 1 (yeast) [Source:ZFIN;Acc:ZDB-GENE-030131-6459]	-1.18666	0.0310573
F1QPT3	ENSDARG00000026629	gmds	GDP-mannose 4,6-dehydratase [Source:ZFIN;Acc:ZDB-GENE-050419-45]	-1.18534	0.0189146
Q1ECX9	ENSDARG00000018491	pdia4	protein disulfide isomerase family A, member 4 [Source:ZFIN;Acc:ZDB-GENE-030131-5493]	-1.18507	0.0457582
Q7ZW20	ENSDARG00000006399	ywhae1	tyrosine 3-monooxygenase/tryptophan 5-monooxygenase activation protein, epsilon polypeptide 1 [Source:ZFIN;Acc:ZDB-GENE-030131-779]	-1.18353	0.0358741
F1QV29	ENSDARG00000087359	c3a.2	complement component c3a, duplicate 2 [Source:ZFIN;Acc:ZDB-GENE-990415-36]	-1.18178	0.0390287
A0A0R4INI3	ENSDARG00000099959	smyhc1	slow myosin heavy chain 1 [Source:ZFIN;Acc:ZDB-GENE-030131-271]	-1.1806	0.0165272
Q7ZVB2	ENSDARG00000069100	aldh9a1a.1	aldehyde dehydrogenase 9 family, member A1a, tandem duplicate 1 [Source:NCBI gene;Acc:100005587]	-1.17945	0.0148329
A0A286Y8Y8	ENSDARG00000054707	dhx8	DEAH (Asp-Glu-Ala-His) box polypeptide 8 [Source:ZFIN;Acc:ZDB-GENE-050809-39]	-1.17671	0.0241145
A3KPZ2	ENSDARG00000098782	cratb	carnitine O-acetyltransferase b [Source:ZFIN;Acc:ZDB-GENE-040912-162]	-1.17638	0.0356431
Q7ZUB3	ENSDARG00000074554	tspan31	tetraspanin 31 [Source:NCBI gene;Acc:393251]	-1.17538	0.0359914
Q6TLF6	ENSDARG00000098645	rgn	regucalcin [Source:NCBI gene;Acc:403070]	-1.17291	0.0197998
F1QZW1	ENSDARG00000079564	myh7	myosin heavy chain 7 [Source:ZFIN;Acc:ZDB-GENE-991123-5]	-1.17271	0.0147559
A0A0R4IYT8	ENSDARG00000102234	si:ch211-71n6.4	si:ch211-71n6.4 [Source:ZFIN;Acc:ZDB-GENE-091204-213]	-1.17209	0.0389517
F1R7F6	ENSDARG00000054746	uggt1	UDP-glucose glycoprotein glucosyltransferase 1 [Source:ZFIN;Acc:ZDB-GENE-061103-619]	-1.15305	0.0317889
F2Z4S3	ENSDARG00000036481	tcn2	transcobalamin II [Source:ZFIN;Acc:ZDB-GENE-030131-4648]	-1.15096	0.02088
Q6P3J5	ENSDARG00000100371	eef2b	eukaryotic translation elongation factor 2b [Source:ZFIN;Acc:ZDB-GENE-030131-5128]	-1.14835	0.0281267
F1R0H8	ENSDARG00000008487	dmd	dystrophin [Source:ZFIN;Acc:ZDB-GENE-010426-1]	-1.14456	0.0369547
Q7SZE3	ENSDARG00000023920	llgl2	LLGL scribble cell polarity complex component 2 [Source:NCBI gene;Acc:795670]	-1.13764	0.0387602
A5A4L9	ENSDARG00000079949	supt16h	SPT16 homolog, facilitates chromatin remodeling subunit [Source:ZFIN;Acc:ZDB-GENE-031118-96]	-1.12867	0.0443651
A0A2R8QKD1	ENSDARG00000117032	slmapb	sarcolemma associated protein b [Source:ZFIN;Acc:ZDB-GENE-040426-809]	-1.12422	0.0236534
Q90Y03	ENSDARG00000053493	aldh1a2	aldehyde dehydrogenase 1 family, member A2 [Source:ZFIN;Acc:ZDB-GENE-011010-3]	-1.11914	0.0249232
A0A2R8RYU6	ENSDARG00000109534	clptm1	CLPTM1 regulator of GABA type A receptor forward trafficking [Source:NCBI gene;Acc:795480]	-1.11521	0.0336378
Q7T2A5	ENSDARG00000101082	eif3s6ip	eukaryotic translation initiation factor 3, subunit 6 interacting protein [Source:NCBI gene;Acc:406402]	-1.11479	0.0357201
F1QRP8	ENSDARG00000022599	dnpep	aspartyl aminopeptidase [Source:ZFIN;Acc:ZDB-GENE-040426-852]	-1.11406	0.0291286
E7EXT3	ENSDARG00000013317	pygmb	phosphorylase, glycogen, muscle b [Source:ZFIN;Acc:ZDB-GENE-040426-1206]	-1.11403	0.0459154
B0UXP9	ENSDARG00000006900	impdh2	IMP (inosine 5'-monophosphate) dehydrogenase 2 [Source:NCBI gene;Acc:317745]	-1.11225	0.0171818
A5PMF6	ENSDARG00000058270	COLGALT1	si:ch211-114l13.7 [Source:NCBI gene;Acc:567859]	-1.11197	0.0141013
F1QTY6	ENSDARG00000008703	apeh	acylaminoacyl-peptide hydrolase [Source:ZFIN;Acc:ZDB-GENE-030131-9870]	-1.1117	0.0219197
Q6P3L3	ENSDARG00000103846	hspa5	heat shock protein 5 [Source:NCBI gene;Acc:378848]	-1.10355	0.0384535
A0A0R4IB13	ENSDARG00000099298	xrcc5	X-ray repair complementing defective repair in Chinese hamster cells 5 [Source:ZFIN;Acc:ZDB-GENE-041008-108]	-1.09857	0.0366466
A0A0R4IPV1	ENSDARG00000100372	alad	aminolevulinate dehydratase [Source:ZFIN;Acc:ZDB-GENE-050417-123]	-1.09836	0.0252312
F1QM42	ENSDARG00000026376	aco1	aconitase 1, soluble [Source:ZFIN;Acc:ZDB-GENE-031118-76]	-1.0939	0.0196073
E7F8G7	ENSDARG00000062590	pleca	plectin a [Source:ZFIN;Acc:ZDB-GENE-030131-8984]	-1.08846	0.0202639
E7F071	ENSDARG00000079780	hnrnpul1l	heterogeneous nuclear ribonucleoprotein U-like 1 like [Source:ZFIN;Acc:ZDB-GENE-030131-890]	-1.08382	0.0340649
X1WE86	ENSDARG00000059701	flii	FLII actin remodeling protein [Source:ZFIN;Acc:ZDB-GENE-071212-3]	-1.07986	0.0400698
A0A2R8PYA0	ENSDARG00000111880	psmb5	proteasome 20S subunit beta 5 [Source:ZFIN;Acc:ZDB-GENE-990415-215]	-1.07827	0.0436673
A0A0R4IMS9	ENSDARG00000099966	polr2a	polymerase (RNA) II (DNA directed) polypeptide A [Source:ZFIN;Acc:ZDB-GENE-041008-78]	-1.07758	0.0314808
Q7ZVR3	ENSDARG00000071566	ppp1cab	protein phosphatase 1, catalytic subunit, alpha isozyme b [Source:ZFIN;Acc:ZDB-GENE-030131-5512]	-1.07735	0.0352942
Q6P9Z2	ENSDARG00000021945	ddx23	DEAD (Asp-Glu-Ala-Asp) box polypeptide 23 [Source:ZFIN;Acc:ZDB-GENE-030131-6215]	-1.07722	0.0387987
E7FBD3	ENSDARG00000042780	apoba	apolipoprotein Ba [Source:ZFIN;Acc:ZDB-GENE-070702-4]	-1.0745	0.0116753
Q6GQM9	ENSDARG00000014287	eno2	enolase 2 [Source:ZFIN;Acc:ZDB-GENE-040704-27]	-1.07398	0.0317504
Q7SXN6	ENSDARG00000019398	psma6a	proteasome 20S subunit alpha 6a [Source:ZFIN;Acc:ZDB-GENE-020326-1]	-1.07207	0.0316734
F1QN52	ENSDARG00000109267	CABZ01024501.1		-1.07003	0.04899
E7EZJ2	ENSDARG00000078362	zmp:0000000846	zmp:0000000846 [Source:ZFIN;Acc:ZDB-GENE-130530-849]	-1.0699	0.0201464
A0A2R8QDB8	ENSDARG00000112777	jupa	junction plakoglobin a [Source:ZFIN;Acc:ZDB-GENE-991207-22]	-1.06352	0.0303626
F6P3G4	ENSDARG00000060150	psmd11a	proteasome 26S subunit, non-ATPase 11a [Source:NCBI gene;Acc:503934]	-1.06272	0.0342565
F1QYE3	ENSDARG00000090768	zp3.2	zona pellucida glycoprotein 3, tandem duplicate 2 [Source:ZFIN;Acc:ZDB-GENE-050626-121]	-1.06119	0.0409943
A0A0G2L974	ENSDARG00000098374		filamin B [Source:HGNC Symbol;Acc:HGNC:3755]	-1.05648	0.0256941
A0A2R8QR17	ENSDARG00000021987	plecb	plectin b [Source:ZFIN;Acc:ZDB-GENE-100917-2]	-1.05578	0.0197228
Q1LVE8	ENSDARG00000103553	sf3b3	splicing factor 3b, subunit 3 [Source:NCBI gene;Acc:406824]	-1.05551	0.0315194
A2BGE5	ENSDARG00000058088	aifm1	apoptosis inducing factor mitochondrion associated 1 [Source:ZFIN;Acc:ZDB-GENE-030826-11]	-1.04192	0.0217656
Q5TZ29	ENSDARG00000022767	apobb.1	apolipoprotein Bb, tandem duplicate 1 [Source:ZFIN;Acc:ZDB-GENE-030131-9732]	-1.03748	0.0304781
Q6DG81	ENSDARG00000037655	pls3	plastin 3 (T isoform) [Source:ZFIN;Acc:ZDB-GENE-040718-10]	-1.03674	0.030093
F1QUS9	ENSDARG00000073710	usp7	ubiquitin specific peptidase 7 (herpes virus-associated) [Source:ZFIN;Acc:ZDB-GENE-030131-3656]	-1.03602	0.0170278
F1R876	ENSDARG00000114568	vtg2	vitellogenin 2 [Source:ZFIN;Acc:ZDB-GENE-001201-2]	-1.02397	0.0332527
A0A2R8QCL7	ENSDARG00000058203	smc1al	structural maintenance of chromosomes 1A, like [Source:ZFIN;Acc:ZDB-GENE-040426-57]	-1.01463	0.0243456
B2GTW6	ENSDARG00000103364	cs	citrate synthase [Source:NCBI gene;Acc:322339]	-1.01111	0.0199539
Q1ED17	ENSDARG00000070545	top1l	DNA topoisomerase I, like [Source:ZFIN;Acc:ZDB-GENE-060616-217]	-1.00557	0.0214576
F1QXP5	ENSDARG00000040492	mthfd1b	methylenetetrahydrofolate dehydrogenase (NADP+ dependent) 1b [Source:ZFIN;Acc:ZDB-GENE-020905-4]	-1.00293	0.0177979
A0A0R4IFL5	ENSDARG00000099653	PSMD2	proteasome 26S subunit, non-ATPase 2 [Source:HGNC Symbol;Acc:HGNC:9559]	-1.00117	0.0264283
Q7T3G4	ENSDARG00000057571	pgam2	phosphoglycerate mutase 2 (muscle) [Source:ZFIN;Acc:ZDB-GENE-040116-6]	-0.998554	0.0297447
B7ZD39	ENSDARG00000030441	ppa1b	inorganic pyrophosphatase 1b [Source:ZFIN;Acc:ZDB-GENE-050417-375]	-0.993904	0.0387217
E9QI36	ENSDARG00000003693	hars	histidyl-tRNA synthetase [Source:ZFIN;Acc:ZDB-GENE-040912-152]	-0.98234	0.0321746
A0A0R4J8E6	ENSDARG00000026180	prpf8	pre-mRNA processing factor 8 [Source:ZFIN;Acc:ZDB-GENE-030131-577]	-0.973183	0.0290131
B0UXL2	ENSDARG00000025375	idh1	isocitrate dehydrogenase (NADP(+)) 1 [Source:ZFIN;Acc:ZDB-GENE-031006-1]	-0.970196	0.0218427
B8A552	ENSDARG00000052348	smarca5	SWI/SNF related, matrix associated, actin dependent regulator of chromatin, subfamily a, member 5 [Source:ZFIN;Acc:ZDB-GENE-021125-1]	-0.968816	0.018337
F1QZA5	ENSDARG00000070674	psmd6	proteasome 26S subunit, non-ATPase 6 [Source:ZFIN;Acc:ZDB-GENE-040426-1038]	-0.964177	0.0279726
Q6NYJ9	ENSDARG00000035152	ap2b1	adaptor related protein complex 2 subunit beta 1 [Source:ZFIN;Acc:ZDB-GENE-030131-6564]	-0.960705	0.0358356
F1QZQ0	ENSDARG00000028213	ttn.2	titin, tandem duplicate 2 [Source:ZFIN;Acc:ZDB-GENE-030113-2]	-0.956296	0.0294367
F1QGS9	ENSDARG00000063126	gusb	glucuronidase, beta [Source:ZFIN;Acc:ZDB-GENE-070705-256]	-0.954733	0.0469613
F1QQV6	ENSDARG00000016775	aqr	aquarius intron-binding spliceosomal factor [Source:ZFIN;Acc:ZDB-GENE-040426-1189]	-0.950887	0.0314423
F1QYE2	ENSDARG00000021948	tnc	tenascin C [Source:ZFIN;Acc:ZDB-GENE-980526-104]	-0.950006	0.0191071
Q9DGL2	ENSDARG00000099203	atp1b2a	ATPase Na+/K+ transporting subunit beta 2a [Source:ZFIN;Acc:ZDB-GENE-001127-2]	-0.943361	0.0278554
B8JKW4	ENSDARG00000012694	c3a.1	complement component c3a, duplicate 1 [Source:ZFIN;Acc:ZDB-GENE-990415-35]	-0.942948	0.0263898
A2THY5	ENSDARG00000025500	mtx1a	metaxin 1a [Source:ZFIN;Acc:ZDB-GENE-060606-2]	-0.934778	0.0331757
P79735	ENSDARG00000057026	ran	RAN, member RAS oncogene family [Source:NCBI gene;Acc:30572]	-0.934597	0.0324046
B0V2X9	ENSDARG00000041728	man1a2	mannosidase, alpha, class 1A, member 2 [Source:ZFIN;Acc:ZDB-GENE-070912-390]	-0.928068	0.0344105
A0A0R4IDZ8	ENSDARG00000100729	tln1	talin 1 [Source:ZFIN;Acc:ZDB-GENE-031002-48]	-0.924182	0.0234609
E9QCQ6	ENSDARG00000054849	bcat2	branched chain amino-acid transaminase 2, mitochondrial [Source:ZFIN;Acc:ZDB-GENE-040718-425]	-0.915499	0.0376441
E7EXY4	ENSDARG00000061268	ago2	argonaute RISC catalytic component 2 [Source:ZFIN;Acc:ZDB-GENE-110606-6]	-0.914935	0.0329034
F6NVB1	ENSDARG00000019969	smarcd3b	SWI/SNF related, matrix associated, actin dependent regulator of chromatin, subfamily d, member 3b [Source:ZFIN;Acc:ZDB-GENE-080509-2]	-0.914424	0.037413
Q8UUT4	ENSDARG00000055455	gpm6aa	glycoprotein M6Aa [Source:ZFIN;Acc:ZDB-GENE-030710-7]	-0.908156	0.0243071
A0A2R8QUS4	ENSDARG00000110176	zgc:136472	zgc:136472 [Source:ZFIN;Acc:ZDB-GENE-060421-2552]	-0.907955	0.0457197
E9QIW2	ENSDARG00000012389	adar	adenosine deaminase RNA specific [Source:ZFIN;Acc:ZDB-GENE-000616-5]	-0.894594	0.0413415
F1R101	ENSDARG00000006200	eif4g1a	eukaryotic translation initiation factor 4 gamma, 1a [Source:ZFIN;Acc:ZDB-GENE-070112-702]	-0.889724	0.028705
F1QDT3	ENSDARG00000057105	nle1	notchless homolog 1 (Drosophila) [Source:ZFIN;Acc:ZDB-GENE-050522-321]	-0.888137	0.0253082
B8A4H6	ENSDARG00000014068	pgam1b	phosphoglycerate mutase 1b [Source:ZFIN;Acc:ZDB-GENE-030131-5376]	-0.879805	0.0205334
Q7SX99	ENSDARG00000075132	fh	fumarate hydratase [Source:NCBI gene;Acc:393938]	-0.865446	0.0230768
Q1MTI4	ENSDARG00000025012	tpi1a	triosephosphate isomerase 1a [Source:NCBI gene;Acc:192309]	-0.858061	0.0350246
A0A2R8QU81	ENSDARG00000115848	nedd8l	NEDD8 ubiquitin like modifier, like [Source:ZFIN;Acc:ZDB-GENE-040718-295]	-0.834308	0.0429296
Q4V9P8	ENSDARG00000071395	camk2g1	calcium/calmodulin-dependent protein kinase (CaM kinase) II gamma 1 [Source:ZFIN;Acc:ZDB-GENE-050913-146]	-0.828528	0.037567
A0A2R8RUW2	ENSDARG00000114286	copb2	coatomer protein complex, subunit beta 2 [Source:ZFIN;Acc:ZDB-GENE-010724-7]	-0.80246	0.0331372
B3DIT8	ENSDARG00000070470	sh3rf1	SH3 domain containing ring finger 1 [Source:NCBI gene;Acc:556523]	-0.796183	0.034372
Q802Z3	ENSDARG00000015310	pitpnbl	phosphatidylinositol transfer protein, beta, like [Source:ZFIN;Acc:ZDB-GENE-040426-2791]	-0.796112	0.0405334
E7FFZ8	ENSDARG00000040290	pon3.2	paraoxonase 3, tandem duplicate 2 [Source:ZFIN;Acc:ZDB-GENE-071004-70]	-0.785887	0.0479308
F1QEX9	ENSDARG00000023797	ryr1b	ryanodine receptor 1b (skeletal) [Source:ZFIN;Acc:ZDB-GENE-070705-417]	-0.785465	0.0306706
F1QTB5	ENSDARG00000059323	rpn1	ribophorin I [Source:ZFIN;Acc:ZDB-GENE-030131-4286]	-0.783962	0.0453313
A0A0R4I9C1	ENSDARG00000035913	yars1	tyrosyl-tRNA synthetase 1 [Source:NCBI gene;Acc:368235]	-0.759555	0.0453698
A7YT47	ENSDARG00000057128	hadhaa	hydroxyacyl-CoA dehydrogenase trifunctional multienzyme complex subunit alpha a [Source:ZFIN;Acc:ZDB-GENE-031222-5]	-0.759269	0.0334068
A0A2R8RQT4	ENSDARG00000114106	gsr	glutathione reductase [Source:ZFIN;Acc:ZDB-GENE-050522-116]	-0.757061	0.0350631
A0A0R4IXL0	ENSDARG00000098783	polr2b	polymerase (RNA) II (DNA directed) polypeptide B [Source:ZFIN;Acc:ZDB-GENE-041008-1]	-0.743118	0.0271599
F1QE54	ENSDARG00000058538	alcamb	activated leukocyte cell adhesion molecule b [Source:ZFIN;Acc:ZDB-GENE-030131-1768]	-0.742384	0.0424257
Q6DGD8	ENSDARG00000012506	rnpep	arginyl aminopeptidase (aminopeptidase B) [Source:ZFIN;Acc:ZDB-GENE-040718-241]	-0.737507	0.0381437
F1QYD7	ENSDARG00000061794	jam3b	junctional adhesion molecule 3b [Source:ZFIN;Acc:ZDB-GENE-030131-441]	-0.720782	0.0289746
Q6P125	ENSDARG00000017675	utp4	UTP4 small subunit processome component [Source:ZFIN;Acc:ZDB-GENE-040426-2466]	-0.699591	0.0498643
Q503E2	ENSDARG00000057151	prep	prolyl endopeptidase [Source:ZFIN;Acc:ZDB-GENE-050522-14]	-0.684765	0.0274695
F1QL66	ENSDARG00000010758	capn12	calpain 12 [Source:ZFIN;Acc:ZDB-GENE-050419-245]	-0.678875	0.0398387
B0V0J5	ENSDARG00000055415	zp2l1	zona pellucida glycoprotein 2, like 1 [Source:ZFIN;Acc:ZDB-GENE-060818-3]	-0.676004	0.0399543
B0JZL9	ENSDARG00000029215	ube2z	ubiquitin-conjugating enzyme E2Z [Source:NCBI gene;Acc:436602]	-0.666591	0.0473927
Q6DC04	ENSDARG00000018698	carm1	coactivator-associated arginine methyltransferase 1 [Source:NCBI gene;Acc:445251]	-0.653742	0.0328264
E9QH31	ENSDARG00000029381	aldh3a2b	aldehyde dehydrogenase 3 family, member A2b [Source:ZFIN;Acc:ZDB-GENE-040912-103]	-0.593709	0.0420788
Q7ZUE4	ENSDARG00000058467	prpf40a	PRP40 pre-mRNA processing factor 40 homolog A [Source:ZFIN;Acc:ZDB-GENE-030131-274]	-0.585967	0.0301701
A0A0R4INB1	ENSDARG00000101407	tgm1l4	transglutaminase 1 like 4 [Source:ZFIN;Acc:ZDB-GENE-050913-29]	-0.564853	0.0285108
Q1LWN2	ENSDARG00000092233	vtg1	vitellogenin 1 [Source:ZFIN;Acc:ZDB-GENE-001201-1]	-0.559835	0.0293982
F1Q4N4	ENSDARG00000007526	ndufs2	NADH:ubiquinone oxidoreductase core subunit S2 [Source:ZFIN;Acc:ZDB-GENE-050522-273]	-0.533064	0.029862
F1R246	ENSDARG00000070043	dars1	aspartyl-tRNA synthetase 1 [Source:ZFIN;Acc:ZDB-GENE-061110-135]	-0.52347	0.037266
B3DKC0	ENSDARG00000045129	fkbp10b	FKBP prolyl isomerase 10b [Source:ZFIN;Acc:ZDB-GENE-030131-3101]	-0.515334	0.041303
A0A0R4IWE1	ENSDARG00000103759	fahd2a	fumarylacetoacetate hydrolase domain containing 2A [Source:ZFIN;Acc:ZDB-GENE-040426-2499]	-0.508498	0.0466869
A0A0R4IQG7	ENSDARG00000068910	nos1	nitric oxide synthase 1 (neuronal) [Source:NCBI gene;Acc:60658]	-0.504263	0.0432418
Q1JPZ7	ENSDARG00000100209	prpf39	PRP39 pre-mRNA processing factor 39 homolog (yeast) [Source:NCBI gene;Acc:368864]	-0.48962	0.0470801

## Sheet: Upregulated, pval<0.05
Supplemental Table 3. List of downregulated and upregulated proteins identified by LC-MS/MS analysis in EWSR1-FLI1 expressing embryos, p < 0.05
ID	Ensembl_gene_id	external_gene_name	description	Log2FC	pval
A0A0G2KE28	ENSDARG00000077605	frrs1b	ferric-chelate reductase 1b [Source:ZFIN;Acc:ZDB-GENE-080917-44]	0.62586	0.0451401
E7F260	ENSDARG00000071449	fam234a	family with sequence similarity 234 member A [Source:ZFIN;Acc:ZDB-GENE-091204-17]	0.660872	0.0430469
F1QMH7	ENSDARG00000016153	dag1	dystroglycan 1 [Source:ZFIN;Acc:ZDB-GENE-021223-1]	0.720683	0.0398002
F1R1B9	ENSDARG00000060263	pecam1	platelet/endothelial cell adhesion molecule 1 [Source:ZFIN;Acc:ZDB-GENE-130530-689]	0.749466	0.044717
Q5TYP5	ENSDARG00000042129	zp3a.1	zona pellucida glycoprotein 3a, tandem duplicate 1 [Source:ZFIN;Acc:ZDB-GENE-040727-1]	0.753721	0.039683
E7F897	ENSDARG00000037144	cpb2	carboxypeptidase B2 (plasma) [Source:ZFIN;Acc:ZDB-GENE-050522-259]	0.802053	0.0223817
F1Q5G5	ENSDARG00000036155	gla	galactosidase, alpha [Source:ZFIN;Acc:ZDB-GENE-041010-207]	0.808167	0.038415
E7FF13	ENSDARG00000006257	vldlr	very low density lipoprotein receptor [Source:ZFIN;Acc:ZDB-GENE-040426-803]	0.811226	0.0299005
D7RVS1	ENSDARG00000000551	slc1a4	solute carrier family 1 member 4 [Source:ZFIN;Acc:ZDB-GENE-030616-566]	0.819263	0.0403776
X1WCE5	ENSDARG00000079835	man2c1	mannosidase, alpha, class 2C, member 1 [Source:ZFIN;Acc:ZDB-GENE-101103-4]	0.825267	0.0234994
F1Q7F9	ENSDARG00000055307	sypl2a	synaptophysin-like 2a [Source:ZFIN;Acc:ZDB-GENE-040426-1434]	0.827582	0.0379136
A7E2L0	ENSDARG00000102105	dad1	defender against cell death 1 [Source:ZFIN;Acc:ZDB-GENE-060503-233]	0.840558	0.0396444
E7F592	ENSDARG00000073773	tti2	TELO2 interacting protein 2 [Source:ZFIN;Acc:ZDB-GENE-110411-25]	0.848431	0.027277
Q8JHH1	ENSDARG00000011648	snrpd1	small nuclear ribonucleoprotein D1 polypeptide [Source:ZFIN;Acc:ZDB-GENE-020419-14]	0.848965	0.0320584
Q90XR9	ENSDARG00000043128	cldne	claudin e [Source:ZFIN;Acc:ZDB-GENE-010328-5]	0.849095	0.0386446
Q7ZW38	ENSDARG00000058292	sephs1	selenophosphate synthetase 1 [Source:NCBI gene;Acc:324947]	0.863936	0.0397617
F1Q4U1	ENSDARG00000002536	tm9sf4	transmembrane 9 superfamily protein member 4 [Source:ZFIN;Acc:ZDB-GENE-040426-1575]	0.872393	0.0425815
F1Q8W8	ENSDARG00000076290	calr	calreticulin [Source:ZFIN;Acc:ZDB-GENE-030131-4042]	0.882334	0.0379521
Q9YH92	ENSDARG00000014047	cldn7b	claudin 7b [Source:NCBI gene;Acc:60635]	0.883622	0.0404161
B0S5N6	ENSDARG00000043646	slc6a8	solute carrier family 6 member 8 [Source:ZFIN;Acc:ZDB-GENE-071024-2]	0.901496	0.038338
F1QPJ6	ENSDARG00000079932	zgc:152830	zgc:152830 [Source:ZFIN;Acc:ZDB-GENE-090312-55]	0.903975	0.027354
X1WCQ3	ENSDARG00000060711	sv2bb	synaptic vesicle glycoprotein 2Bb [Source:ZFIN;Acc:ZDB-GENE-030131-2789]	0.911737	0.0335223
A0A0R4IA57	ENSDARG00000102987	capn7	calpain 7 [Source:ZFIN;Acc:ZDB-GENE-111111-1]	0.912308	0.0234224
F1QBP2	ENSDARG00000035188	rab14l	RAB14, member RAS oncogene family, like [Source:ZFIN;Acc:ZDB-GENE-040426-1207]	0.915572	0.0456427
Q7T2J4	ENSDARG00000024278	adh8b	alcohol dehydrogenase 8b [Source:ZFIN;Acc:ZDB-GENE-030529-2]	0.940415	0.0284337
F1QAB3	ENSDARG00000076321	col28a2a	collagen, type XXVIII, alpha 2a [Source:ZFIN;Acc:ZDB-GENE-030131-4444]	0.948645	0.0338706
A0A2R8RJ88	ENSDARG00000109717	SLC35E2A	solute carrier family 35 member E2B [Source:NCBI gene;Acc:100331662]	0.9488	0.042269
A9LDD9	ENSDARG00000104414	shmt2	serine hydroxymethyltransferase 2 (mitochondrial) [Source:ZFIN;Acc:ZDB-GENE-071213-1]	0.949551	0.0307477
Q1LUX8	ENSDARG00000040527	siae	sialic acid acetylesterase [Source:ZFIN;Acc:ZDB-GENE-040426-1032]	0.951047	0.0302471
Q7ZVL5	ENSDARG00000029353	serpine2	serpin peptidase inhibitor, clade E (nexin, plasminogen activator inhibitor type 1), member 2 [Source:ZFIN;Acc:ZDB-GENE-040426-848]	0.955391	0.0414971
E7F2X1	ENSDARG00000079463	man2b2	mannosidase, alpha, class 2B, member 2 [Source:ZFIN;Acc:ZDB-GENE-140106-166]	0.965215	0.0420403
F1QIS1	ENSDARG00000071345	mgst2	microsomal glutathione S-transferase 2 [Source:ZFIN;Acc:ZDB-GENE-060616-94]	0.980659	0.0400313
Q5U3W0	ENSDARG00000031968	cpped1	calcineurin-like phosphoesterase domain containing 1 [Source:NCBI gene;Acc:492772]	0.985362	0.0414185
F1QTT0	ENSDARG00000001897	man2b1	mannosidase, alpha, class 2B, member 1 [Source:ZFIN;Acc:ZDB-GENE-050327-52]	0.989357	0.0332912
E7EXC4	ENSDARG00000091801	serpinb14	serpin peptidase inhibitor, clade B (ovalbumin), member 14 [Source:ZFIN;Acc:ZDB-GENE-050506-148]	0.989647	0.0282412
B0S636	ENSDARG00000086815	MYADM	si:dkeyp-67a8.2 [Source:ZFIN;Acc:ZDB-GENE-070912-664]	0.990242	0.0335608
Q6P6E0	ENSDARG00000011841	atp5l	ATP synthase, H+ transporting, mitochondrial F0 complex, subunit g [Source:ZFIN;Acc:ZDB-GENE-030131-5177]	0.993613	0.0315579
F1RAP6	ENSDARG00000061383	serpinf2b	serpin peptidase inhibitor, clade F (alpha-2 antiplasmin, pigment epithelium derived factor), member 2b [Source:ZFIN;Acc:ZDB-GENE-061215-114]	1.00707	0.0286665
F1QHG3	ENSDARG00000057263	zgc:173729	zgc:173729 [Source:ZFIN;Acc:ZDB-GENE-071004-64]	1.01267	0.044483
F8W2M8	ENSDARG00000042793	tpp1	tripeptidyl peptidase I [Source:NCBI gene;Acc:798347]	1.01579	0.0439777
F1QTF9	ENSDARG00000055036	itih3a	inter-alpha-trypsin inhibitor heavy chain 3a [Source:ZFIN;Acc:ZDB-GENE-050522-262]	1.01741	0.0334453
B0S5D9	ENSDARG00000003866	tm9sf2	transmembrane 9 superfamily member 2 [Source:ZFIN;Acc:ZDB-GENE-030131-6302]	1.01982	0.0381052
A0A2R8PY98	ENSDARG00000110186	CDCP1	CUB domain containing protein 1b [Source:NCBI gene;Acc:560859]	1.02677	0.0269289
Q9MIY1	ENSDARG00000063917	mt-nd4	NADH dehydrogenase subunit 4 [Source:NCBI gene;Acc:140534]	1.03447	0.0389902
A7YY10	ENSDARG00000115271	zgc:171772	zgc:171772 [Source:ZFIN;Acc:ZDB-GENE-070928-31]	1.03557	0.0395303
F1Q7L6	ENSDARG00000112231	slc3a2a	solute carrier family 3 member 2a [Source:ZFIN;Acc:ZDB-GENE-000831-3]	1.03658	0.0407643
B0VEQ2	ENSDARG00000008407	tspan7b	tetraspanin 7b [Source:ZFIN;Acc:ZDB-GENE-040927-5]	1.04072	0.0294752
Q7ZWJ4	ENSDARG00000025073	rpl18a	ribosomal protein L18a [Source:NCBI gene;Acc:394035]	1.04199	0.0434357
F6P873	ENSDARG00000037867	atp5mf	ATP synthase membrane subunit f [Source:ZFIN;Acc:ZDB-GENE-050309-87]	1.04246	0.0498258
F1QX13	ENSDARG00000052207	c3a.3	complement component c3a, duplicate 3 [Source:ZFIN;Acc:ZDB-GENE-990415-37]	1.04568	0.0418477
E7F9F2	ENSDARG00000088560	tmem104	transmembrane protein 104 [Source:ZFIN;Acc:ZDB-GENE-070822-4]	1.0504	0.0421929
F1QCK2	ENSDARG00000063297	abcb6a	ATP-binding cassette, sub-family B (MDR/TAP), member 6a [Source:ZFIN;Acc:ZDB-GENE-050517-9]	1.05679	0.0228073
F1QCZ7	ENSDARG00000075622	zgc:174938	zgc:174938 [Source:ZFIN;Acc:ZDB-GENE-070928-44]	1.06088	0.0221892
F1Q528	ENSDARG00000071724	ankha	ANKH inorganic pyrophosphate transport regulator a [Source:ZFIN;Acc:ZDB-GENE-050913-33]	1.06107	0.0374515
F1QGI4	ENSDARG00000014329	npm1a	nucleophosmin 1a [Source:ZFIN;Acc:ZDB-GENE-021028-1]	1.07649	0.0376826
Q7SXA3	ENSDARG00000032725	rps27a	ribosomal protein S27a [Source:ZFIN;Acc:ZDB-GENE-030131-10018]	1.07901	0.0312883
F1R4E3	ENSDARG00000055445	slc22a15	solute carrier family 22 member 15 [Source:ZFIN;Acc:ZDB-GENE-070928-5]	1.08151	0.034295
Q9MIX8	ENSDARG00000063924	mt-cyb	cytochrome b [Source:NCBI gene;Acc:140512]	1.08655	0.0348716
F1R8S7	ENSDARG00000055523	slc22a6l	solute carrier family 22 member 6, like [Source:NCBI gene;Acc:404609]	1.08681	0.0415356
A0A2R8PX52	ENSDARG00000059231	hephl1a	hephaestin-like 1a [Source:ZFIN;Acc:ZDB-GENE-070801-4]	1.10772	0.0333683
A0A2R8S001	ENSDARG00000069003	pcyox1l	prenylcysteine oxidase 1 like [Source:ZFIN;Acc:ZDB-GENE-141212-302]	1.11353	0.0256556
F8W546	ENSDARG00000076121	smpd1	sphingomyelin phosphodiesterase 1 [Source:ZFIN;Acc:ZDB-GENE-110411-222]	1.12278	0.0285895
E7F9V1	ENSDARG00000086647	chrng	cholinergic receptor, nicotinic, gamma [Source:ZFIN;Acc:ZDB-GENE-030131-3805]	1.12708	0.0427336
A0A0R4I9P3	ENSDARG00000105208	zgc:85843	zgc:85843 [Source:ZFIN;Acc:ZDB-GENE-040426-2362]	1.12786	0.0411855
A0A2R8Q2J7	ENSDARG00000111470	ndfip1	Nedd4 family interacting protein 1 [Source:ZFIN;Acc:ZDB-GENE-030131-2767]	1.1346	0.0326339
A0A2R8Q2J0	ENSDARG00000017180	npc1	Niemann-Pick disease, type C1 [Source:ZFIN;Acc:ZDB-GENE-030131-3161]	1.14418	0.0301315
Q4V915	ENSDARG00000034753	tspan3a	tetraspanin 3a [Source:ZFIN;Acc:ZDB-GENE-030131-7787]	1.16825	0.0340264
Q6Q420	ENSDARG00000010160	rps15a	ribosomal protein S15a [Source:NCBI gene;Acc:336764]	1.16841	0.0471957
F1Q7Z4	ENSDARG00000037091	asah1a	N-acylsphingosine amidohydrolase (acid ceramidase) 1a [Source:ZFIN;Acc:ZDB-GENE-041010-191]	1.1909	0.0355661
Q567F1	ENSDARG00000006468	grap2a	GRB2 related adaptor protein 2a [Source:ZFIN;Acc:ZDB-GENE-050417-275]	1.19667	0.0396059
Q803Z2	ENSDARG00000020449	yipf3	Yip1 domain family, member 3 [Source:NCBI gene;Acc:334511]	1.20562	0.038492
A0A2R8RWU7	ENSDARG00000110931	lrrc15	leucine rich repeat containing 15 [Source:ZFIN;Acc:ZDB-GENE-031113-8]	1.20782	0.0302086
E7F7K2	ENSDARG00000058318	c1qtnf9	C1q and TNF related 9 [Source:ZFIN;Acc:ZDB-GENE-080303-33]	1.22143	0.0246921
Q9MIY9	ENSDARG00000063899	mt-nd2	NADH dehydrogenase subunit 2 [Source:NCBI gene;Acc:140532]	1.22241	0.0419247
F1QF26	ENSDARG00000038901	tmem256	transmembrane protein 256 [Source:NCBI gene;Acc:550283]	1.2242	0.0259627
Q5TYX2	ENSDARG00000069251	zpax1	zona pellucida protein AX 1 [Source:ZFIN;Acc:ZDB-GENE-030131-5968]	1.22716	0.0284722
A0A0R4IDU8	ENSDARG00000101913	CABZ01092156.1		1.23651	0.0151409
A1XF92	ENSDARG00000059826	crtac1a	cartilage acidic protein 1a [Source:ZFIN;Acc:ZDB-GENE-030131-9704]	1.24163	0.0276243
B0V2R5	ENSDARG00000013222	slc35a3a	solute carrier family 35 member A3a [Source:ZFIN;Acc:ZDB-GENE-081105-80]	1.24594	0.0468843
A5WWD5	ENSDARG00000076592	man1b1b	mannosidase, alpha, class 1B, member 1b [Source:ZFIN;Acc:ZDB-GENE-070705-482]	1.26028	0.0292441
F6PCI7	ENSDARG00000094952	si:ch211-74m13.1	si:ch211-74m13.1 [Source:ZFIN;Acc:ZDB-GENE-081104-12]	1.26174	0.0378366
Q5XIY2	ENSDARG00000098224	tlcd4b	TLC domain containing 4b [Source:NCBI gene;Acc:449652]	1.26502	0.0425027
F1QDL1	ENSDARG00000035809	col1a1b	collagen, type I, alpha 1b [Source:ZFIN;Acc:ZDB-GENE-030131-4400]	1.26513	0.0381822
A0A0R4IU44	ENSDARG00000102722	itih3b	inter-alpha-trypsin inhibitor heavy chain 3b [Source:ZFIN;Acc:ZDB-GENE-040426-2716]	1.26652	0.0273925
E7F6C7	ENSDARG00000006420	atrnl1b	attractin-like 1b [Source:ZFIN;Acc:ZDB-GENE-030131-8092]	1.26851	0.0203024
Q5XJX0	ENSDARG00000041071	jagn1a	jagunal homolog 1a [Source:NCBI gene;Acc:449830]	1.27715	0.0462652
A0A2R8QGZ6	ENSDARG00000057736	ano10a	anoctamin 10a [Source:NCBI gene;Acc:566425]	1.27735	0.04107
F1QR45	ENSDARG00000067805	ggcx	gamma-glutamyl carboxylase [Source:ZFIN;Acc:ZDB-GENE-030826-27]	1.28361	0.0255786
Q6P2T9	ENSDARG00000025147	cd63	CD63 molecule [Source:ZFIN;Acc:ZDB-GENE-030131-180]	1.28417	0.0295522
F1Q610	ENSDARG00000076754	slc9a7	solute carrier family 9 member 7 [Source:ZFIN;Acc:ZDB-GENE-050913-8]	1.28597	0.0268133
F1QVT8	ENSDARG00000040469	enpp6	ectonucleotide pyrophosphatase/phosphodiesterase 6 [Source:NCBI gene;Acc:791915]	1.28875	0.0446028
A0A0R4IKF9	ENSDARG00000104559	tmem63ba	transmembrane protein 63Ba [Source:ZFIN;Acc:ZDB-GENE-030131-4320]	1.29014	0.0173743
Q6PEJ2	ENSDARG00000026967	ap2s1	adaptor related protein complex 2 subunit sigma 1 [Source:ZFIN;Acc:ZDB-GENE-040426-2174]	1.30129	0.0332142
Q6P4U7	ENSDARG00000019137	tram1	translocation associated membrane protein 1 [Source:ZFIN;Acc:ZDB-GENE-021011-1]	1.30197	0.0199154
F8W4E2	ENSDARG00000010130	smpdl3b	sphingomyelin phosphodiesterase acid like 3B [Source:ZFIN;Acc:ZDB-GENE-041008-132]	1.30352	0.0304011
F1Q9M4	ENSDARG00000015946	slc44a1a	solute carrier family 44 member 1a [Source:ZFIN;Acc:ZDB-GENE-050417-204]	1.30379	0.0452928
F1R6R1	ENSDARG00000054290	acin1a	apoptotic chromatin condensation inducer 1a [Source:ZFIN;Acc:ZDB-GENE-030616-583]	1.30601	0.0357586
R4GDY8	ENSDARG00000040510	ca15b	carbonic anhydrase XVb [Source:ZFIN;Acc:ZDB-GENE-040426-2222]	1.32148	0.0470416
F1Q4W3	ENSDARG00000021905	derl1	derlin 1 [Source:ZFIN;Acc:ZDB-GENE-040426-2793]	1.33148	0.0421173
A0A2R8Q7L1	ENSDARG00000111702	BX323086.1		1.35849	0.0307862
Q5VSE9	ENSDARG00000043555	tmem30ab	transmembrane protein 30Ab [Source:ZFIN;Acc:ZDB-GENE-030131-5884]	1.35864	0.0295137
A0A0R4IRL8	ENSDARG00000101557	scarb1	scavenger receptor class B, member 1 [Source:ZFIN;Acc:ZDB-GENE-031126-1]	1.36086	0.0215346
A5PMX1	ENSDARG00000019998	slc30a7	solute carrier family 30 member 7 [Source:NCBI gene;Acc:327439]	1.36874	0.0175668
A0A140LGR0	ENSDARG00000003269	clcn3	chloride channel 3 [Source:ZFIN;Acc:ZDB-GENE-030131-1699]	1.36889	0.0188761
A0A2R8Q9Q9	ENSDARG00000001804	zgc:112148	zgc:112148 [Source:ZFIN;Acc:ZDB-GENE-050417-235]	1.38356	0.0290901
F1QUV9	ENSDARG00000012002	slc38a7	solute carrier family 38 member 7 [Source:NCBI gene;Acc:445254]	1.38956	0.0196458
E7FCP7	ENSDARG00000074282	si:ch73-12o23.1	si:ch73-12o23.1 [Source:ZFIN;Acc:ZDB-GENE-130530-749]	1.39526	0.0243841
A0A2R8Q808	ENSDARG00000008238	manba	mannosidase, beta A, lysosomal [Source:ZFIN;Acc:ZDB-GENE-040426-721]	1.39665	0.028628
I3IT66	ENSDARG00000017617	alg6	ALG6 alpha-1,3-glucosyltransferase [Source:ZFIN;Acc:ZDB-GENE-040808-45]	1.40165	0.0280882
Q285P3	ENSDARG00000001437	slc2a1a	solute carrier family 2 member 1a [Source:ZFIN;Acc:ZDB-GENE-030131-3158]	1.40237	0.0415741
Q6Q415	ENSDARG00000100588	rpl36	ribosomal protein L36 [Source:NCBI gene;Acc:405888]	1.40434	0.0268903
Q9I9E5	ENSDARG00000011125	snrpb	small nuclear ribonucleoprotein polypeptides B and B1 [Source:ZFIN;Acc:ZDB-GENE-040426-1819]	1.41574	0.0317119
Q6P3H9	ENSDARG00000037012	slc3a2b	solute carrier family 3 member 2b [Source:ZFIN;Acc:ZDB-GENE-040122-2]	1.4197	0.0263513
F6P0C3	ENSDARG00000114448	c3b.2	complement component c3b, tandem duplicate 2 [Source:ZFIN;Acc:ZDB-GENE-030131-3063]	1.42137	0.0191861
A0A0R4I9L8	ENSDARG00000101312	si:dkey-31n13.4	si:dkey-31n13.4 [Source:ZFIN;Acc:ZDB-GENE-071008-3]	1.42293	0.0212651
Q7SXT2	ENSDARG00000015759	tspan7	tetraspanin 7 [Source:ZFIN;Acc:ZDB-GENE-030131-5435]	1.42385	0.030016
A5WV48	ENSDARG00000042270	arsa	arylsulfatase A [Source:ZFIN;Acc:ZDB-GENE-050320-118]	1.42762	0.0439392
A0A0G2KZI8	ENSDARG00000067784	CABZ01088428.1	solute carrier family 9 member A1a [Source:NCBI gene;Acc:101885761]	1.43758	0.034449
Q6IQX2	ENSDARG00000020007	col1a2	collagen, type I, alpha 2 [Source:ZFIN;Acc:ZDB-GENE-030131-8415]	1.45579	0.0337166
A0A2R8QCH1	ENSDARG00000014914	lamp2	lysosomal-associated membrane protein 2 [Source:ZFIN;Acc:ZDB-GENE-030729-9]	1.45976	0.024153
Q6DRD2	ENSDARG00000037038	psmc6	proteasome 26S subunit, ATPase 6 [Source:ZFIN;Acc:ZDB-GENE-030131-304]	1.47191	0.0382207
F1QIP9	ENSDARG00000075737	zgc:165518	zgc:165518 [Source:ZFIN;Acc:ZDB-GENE-070720-15]	1.47799	0.0201079
E9QBI8	ENSDARG00000037964	lhx2a	LIM homeobox 2a [Source:ZFIN;Acc:ZDB-GENE-091118-109]	1.48609	0.0324781
Q8JGR8	ENSDARG00000098312	scarb2a	scavenger receptor class B, member 2a [Source:ZFIN;Acc:ZDB-GENE-020419-29]	1.4973	0.0338321
Q8AYE3	ENSDARG00000042684	serpinc1	serpin peptidase inhibitor, clade C (antithrombin), member 1 [Source:ZFIN;Acc:ZDB-GENE-030131-264]	1.50256	0.0309032
Q6IQ66	ENSDARG00000078073	nudt5	nudix (nucleoside diphosphate linked moiety X)-type motif 5 [Source:ZFIN;Acc:ZDB-GENE-040625-63]	1.50413	0.0117523
F1Q5U9	ENSDARG00000074967	zgc:162698	zgc:162698 [Source:ZFIN;Acc:ZDB-GENE-041111-185]	1.50475	0.0313653
Q6P3M0	ENSDARG00000005463	slc30a1a	solute carrier family 30 member 1a [Source:ZFIN;Acc:ZDB-GENE-040426-1840]	1.50744	0.0392959
B0S758	ENSDARG00000028213	ttn.2	titin, tandem duplicate 2 [Source:ZFIN;Acc:ZDB-GENE-030113-2]	1.51093	0.0220352
Q6NWG0	ENSDARG00000024540	tspan36	tetraspanin 36 [Source:NCBI gene;Acc:437021]	1.51486	0.0296292
A0A0R4IMG2	ENSDARG00000098296	gnsb	glucosamine (N-acetyl)-6-sulfatase (Sanfilippo disease IIID), b [Source:ZFIN;Acc:ZDB-GENE-030131-5846]	1.52083	0.0260012
A2CEN1	ENSDARG00000094324	efemp2a	EGF containing fibulin extracellular matrix protein 2a [Source:ZFIN;Acc:ZDB-GENE-041212-8]	1.52437	0.0198769
Q642H9	ENSDARG00000014690	rps4x	ribosomal protein S4 X-linked [Source:NCBI gene;Acc:449547]	1.52726	0.0361454
F1QK78	ENSDARG00000010727	ttyh2l	tweety homolog 2, like [Source:NCBI gene;Acc:406540]	1.54085	0.0248462
Q9MIY8	ENSDARG00000063905	mt-co1	cytochrome c oxidase subunit I [Source:NCBI gene;Acc:140539]	1.54828	0.0213036
X1WGF3	ENSDARG00000059824	soat2	sterol O-acyltransferase 2 [Source:ZFIN;Acc:ZDB-GENE-061013-742]	1.55434	0.0393729
A2BFP5	ENSDARG00000060366	slc12a9	solute carrier family 12 member 9 [Source:NCBI gene;Acc:793341]	1.55708	0.0333297
Q5SPB1	ENSDARG00000045886	slc38a2	solute carrier family 38 member 2 [Source:NCBI gene;Acc:566537]	1.56549	0.0357971
B3DJI9	ENSDARG00000034168	serpini1	serpin peptidase inhibitor, clade I (neuroserpin), member 1 [Source:ZFIN;Acc:ZDB-GENE-060503-390]	1.56855	0.0404949
F1R4S7	ENSDARG00000058226	ak3	adenylate kinase 3 [Source:ZFIN;Acc:ZDB-GENE-040426-2142]	1.5801	0.0337551
E7FB29	ENSDARG00000077983	GPR89B	si:ch73-390b10.2 [Source:ZFIN;Acc:ZDB-GENE-110411-241]	1.59002	0.0460289
Q9DDT0	ENSDARG00000015551	fth1a	ferritin, heavy polypeptide 1a [Source:ZFIN;Acc:ZDB-GENE-000831-2]	1.5923	0.0313268
F1QS86	ENSDARG00000008835	si:dkey-46g23.5	si:dkey-46g23.5 [Source:ZFIN;Acc:ZDB-GENE-030131-9306]	1.59503	0.0104799
Q6DHS3	ENSDARG00000009285	rpl15	ribosomal protein L15 [Source:ZFIN;Acc:ZDB-GENE-040801-183]	1.5953	0.0323276
E7F6X2	ENSDARG00000086183	vkorc1	vitamin K epoxide reductase complex, subunit 1 [Source:ZFIN;Acc:ZDB-GENE-030131-2286]	1.59777	0.0257326
P62247	ENSDARG00000055996	rps8a	ribosomal protein S8a [Source:NCBI gene;Acc:407690]	1.6005	0.0192246
G1K2N0	ENSDARG00000041811	rps25	ribosomal protein S25 [Source:NCBI gene;Acc:393788]	1.60063	0.0325166
P58781	ENSDARG00000051746	ada2a	adenosine deaminase 2a [Source:NCBI gene;Acc:373884]	1.60305	0.0196843
F1R6K1	ENSDARG00000062363	phex	phosphate regulating endopeptidase homolog, X-linked [Source:ZFIN;Acc:ZDB-GENE-030103-2]	1.60579	0.0145248
A0A0G2KW52	ENSDARG00000103284	CABZ01110881.1		1.63132	0.0367236
A0A2R8QDV2	ENSDARG00000117133	cst14b.1	cystatin 14b, tandem duplicate 1 [Source:NCBI gene;Acc:768128]	1.64034	0.0132156
F1R4Q5	ENSDARG00000071699	ids	iduronate 2-sulfatase [Source:ZFIN;Acc:ZDB-GENE-061215-37]	1.6419	0.0279341
E7EXU6	ENSDARG00000075831	slc7a8a	solute carrier family 7 member 8a [Source:ZFIN;Acc:ZDB-GENE-121120-2]	1.65189	0.0368006
Q6TLG8	ENSDARG00000103007	rps3	ribosomal protein S3 [Source:ZFIN;Acc:ZDB-GENE-030131-8494]	1.65874	0.0283567
A0A2R8QLX3	ENSDARG00000044902	atp2b4	ATPase plasma membrane Ca2+ transporting 4 [Source:ZFIN;Acc:ZDB-GENE-061027-60]	1.66738	0.0139857
Q1ECV3	ENSDARG00000012005	mob2b	MOB kinase activator 2b [Source:ZFIN;Acc:ZDB-GENE-060616-319]	1.67769	0.0239615
F1QNU7	ENSDARG00000053448	si:ch211-251f6.6	si:ch211-251f6.6 [Source:ZFIN;Acc:ZDB-GENE-030131-3219]	1.6791	0.0233839
E7FCS3	ENSDARG00000078183	zgc:165453	zgc:165453 [Source:ZFIN;Acc:ZDB-GENE-070720-13]	1.68159	0.0118294
Q6IMW8	ENSDARG00000036316	rpl39	ribosomal protein L39 [Source:ZFIN;Acc:ZDB-GENE-040625-51]	1.68584	0.0251157
B3DK37	ENSDARG00000078094	lmf2a	lipase maturation factor 2a [Source:ZFIN;Acc:ZDB-GENE-080723-47]	1.69445	0.0162191
A2AR67	ENSDARG00000037153	atp6ap1b	ATPase H+ transporting accessory protein 1b [Source:ZFIN;Acc:ZDB-GENE-020423-2]	1.70281	0.0186065
A5D6U8	ENSDARG00000102421	acp7	acid phosphatase 7, tartrate resistant (putative) [Source:NCBI gene;Acc:571830]	1.70789	0.0218041
Q1LWH1	ENSDARG00000045487	rps16	ribosomal protein S16 [Source:ZFIN;Acc:ZDB-GENE-050506-107]	1.71224	0.0261955
Q6NWC3	ENSDARG00000077291	rps2	ribosomal protein S2 [Source:ZFIN;Acc:ZDB-GENE-040426-2454]	1.71515	0.0363771
Q5BJJ2	ENSDARG00000003599	rpl3	ribosomal protein L3 [Source:ZFIN;Acc:ZDB-GENE-030131-1291]	1.71592	0.00974824
F1R152	ENSDARG00000023766	gnsa	glucosamine (N-acetyl)-6-sulfatase a [Source:ZFIN;Acc:ZDB-GENE-050107-5]	1.71712	0.0244226
A4UU77	ENSDARG00000076474	org	oogenesis-related gene [Source:ZFIN;Acc:ZDB-GENE-050208-584]	1.72432	0.0113655
Q6PBX9	ENSDARG00000100742	reep5	receptor accessory protein 5 [Source:ZFIN;Acc:ZDB-GENE-030131-9181]	1.72569	0.0270444
Q6TH32	ENSDARG00000021124	cfl1	cofilin 1 [Source:ZFIN;Acc:ZDB-GENE-030131-215]	1.73151	0.0194918
Q5RFZ8	ENSDARG00000070625	enpp5	ectonucleotide pyrophosphatase/phosphodiesterase 5 [Source:ZFIN;Acc:ZDB-GENE-041014-10]	1.73357	0.0312498
A0A0R4IMG3	ENSDARG00000100260	them6	thioesterase superfamily member 6 [Source:ZFIN;Acc:ZDB-GENE-070912-340]	1.75067	0.0486812
Q2LDA1	ENSDARG00000069093	col2a1a	collagen, type II, alpha 1a [Source:ZFIN;Acc:ZDB-GENE-980526-192]	1.75148	0.0228458
A3KPH8	ENSDARG00000056498	crp2	C-reactive protein 2 [Source:ZFIN;Acc:ZDB-GENE-030131-5826]	1.75665	0.0238075
A0A0R4IXS9	ENSDARG00000101823	si:ch211-243p7.3	si:ch211-243p7.3 [Source:ZFIN;Acc:ZDB-GENE-141216-202]	1.75798	0.0341794
Q5RHE5	ENSDARG00000029388	si:dkey-90m5.4	si:dkey-90m5.4 [Source:ZFIN;Acc:ZDB-GENE-041014-250]	1.76285	0.0266978
Q9YH91	ENSDARG00000006580	cldnd	claudin d [Source:NCBI gene;Acc:81583]	1.76924	0.0174898
R4GEP5	ENSDARG00000096651	gpr108	G protein-coupled receptor 108 [Source:ZFIN;Acc:ZDB-GENE-121214-129]	1.77045	0.0344875
Q5SPJ1	ENSDARG00000090850	serpina1l	serine (or cysteine) proteinase inhibitor, clade A (alpha-1 antiproteinase, antitrypsin), member 1, like [Source:ZFIN;Acc:ZDB-GENE-040721-3]	1.77571	0.0213421
A0A0R4IJB1	ENSDARG00000104028	si:dkey-74k8.3	si:dkey-74k8.3 [Source:ZFIN;Acc:ZDB-GENE-141222-20]	1.79651	0.0360299
A0A286YBP4	ENSDARG00000005791	rpl28	ribosomal protein L28 [Source:ZFIN;Acc:ZDB-GENE-040930-10]	1.79825	0.0305551
E7F8A7	ENSDARG00000053481	entpd5a	ectonucleoside triphosphate diphosphohydrolase 5a [Source:ZFIN;Acc:ZDB-GENE-100419-1]	1.80476	0.0216116
A0A0R4ICS1	ENSDARG00000103056	itga4	integrin alpha 4 [Source:ZFIN;Acc:ZDB-GENE-110411-108]	1.8159	0.0131386
E9QGU4	ENSDARG00000021252	cct6a	chaperonin containing TCP1, subunit 6A (zeta 1) [Source:ZFIN;Acc:ZDB-GENE-011018-2]	1.82483	0.0157185
F1QBW2	ENSDARG00000014378	slc12a4	solute carrier family 12 member 4 [Source:ZFIN;Acc:ZDB-GENE-090218-27]	1.84389	0.0355276
A0A2R8QI73	ENSDARG00000053381	plpp1a	phospholipid phosphatase 1a [Source:ZFIN;Acc:ZDB-GENE-080225-26]	1.84418	0.0403391
E9QCP4	ENSDARG00000092610	lamp1b	lysosomal associated membrane protein 1b [Source:ZFIN;Acc:ZDB-GENE-030131-9303]	1.84436	0.0288206
F2Z4V7	ENSDARG00000037393	slc43a1a	solute carrier family 43 member 1a [Source:ZFIN;Acc:ZDB-GENE-030131-6327]	1.85055	0.0263127
F1QFD2	ENSDARG00000057138	zgc:174164	zgc:174164 [Source:ZFIN;Acc:ZDB-GENE-030131-4971]	1.85627	0.0142938
Q6DRN8	ENSDARG00000070686	cdipt	CDP-diacylglycerol--inositol 3-phosphatidyltransferase (phosphatidylinositol synthase) [Source:ZFIN;Acc:ZDB-GENE-040426-2536]	1.85982	0.023846
F8W298	ENSDARG00000091136	zgc:174259	zgc:174259 [Source:ZFIN;Acc:ZDB-GENE-080213-10]	1.87104	0.0172588
F1REP2	ENSDARG00000074764	zgc:171426	zgc:171426 [Source:ZFIN;Acc:ZDB-GENE-080212-2]	1.88337	0.0129846
A0A2R8QDG3	ENSDARG00000021787	abcb5	ATP-binding cassette, sub-family B (MDR/TAP), member 5 [Source:ZFIN;Acc:ZDB-GENE-030131-6414]	1.88728	0.0366081
Q1LXU2	ENSDARG00000024492	col9a2	procollagen, type IX, alpha 2 [Source:ZFIN;Acc:ZDB-GENE-030131-9786]	1.89571	0.0356816
E7FGH4	ENSDARG00000098105	tmem106c	transmembrane protein 106C [Source:ZFIN;Acc:ZDB-GENE-061013-562]	1.91598	0.0218812
A0A2R8RLB3	ENSDARG00000115205	zgc:171445	zgc:171445 [Source:ZFIN;Acc:ZDB-GENE-080205-2]	1.91718	0.0169507
Q6IQQ0	ENSDARG00000010516	rpl21	ribosomal protein L21 [Source:ZFIN;Acc:ZDB-GENE-030131-8512]	1.92853	0.0370317
Q5SPJ4	ENSDARG00000090286	serpina1	serpin peptidase inhibitor, clade A (alpha-1 antiproteinase, antitrypsin), member 1 [Source:ZFIN;Acc:ZDB-GENE-030131-1421]	1.92879	0.0237305
Q7T309	ENSDARG00000014556	serpinb1l3	serpin peptidase inhibitor, clade B (ovalbumin), member 1, like 3 [Source:ZFIN;Acc:ZDB-GENE-030131-7059]	1.93189	0.0235379
Q6PGW3	ENSDARG00000104285	armh3	armadillo like helical domain containing 3 [Source:NCBI gene;Acc:393591]	1.94576	0.0100563
A0A0R4IJ49	ENSDARG00000030602	rps19	ribosomal protein S19 [Source:ZFIN;Acc:ZDB-GENE-040426-1716]	1.94682	0.0361839
Q9DGJ3	ENSDARG00000090912	npc2	Niemann-Pick disease, type C2 [Source:NCBI gene;Acc:282673]	1.94972	0.0377596
A0A2R8QDG4	ENSDARG00000111410		CLN5 intracellular trafficking protein [Source:NCBI gene;Acc:569407]	1.95279	0.0139087
F1QYH2	ENSDARG00000016474	galcb	galactosylceramidase b [Source:ZFIN;Acc:ZDB-GENE-040426-2115]	1.95296	0.011173
A0A2R8QS89	ENSDARG00000053963	npm2b	nucleophosmin/nucleoplasmin, 2b [Source:ZFIN;Acc:ZDB-GENE-070410-125]	1.96048	0.00978675
A4IG22	ENSDARG00000068286	slc7a4	solute carrier family 7 member 4 [Source:ZFIN;Acc:ZDB-GENE-030919-2]	1.98977	0.0260782
F1Q4X5	ENSDARG00000015065	c4	complement component 4 [Source:ZFIN;Acc:ZDB-GENE-030131-5697]	1.99591	0.0351016
A0A0G2KJ38	ENSDARG00000099078			2.0002	0.0376056
F1RD77	ENSDARG00000037675	npm1b	nucleophosmin 1b [Source:ZFIN;Acc:ZDB-GENE-080723-7]	2.0031	0.0202254
Q8JHJ1	ENSDARG00000018334	rpl35	ribosomal protein L35 [Source:NCBI gene;Acc:192299]	2.01202	0.0426575
F6NQ58	ENSDARG00000076448	serpinf2a	serpin peptidase inhibitor, clade F (alpha-2 antiplasmin, pigment epithelium derived factor), member 2a [Source:ZFIN;Acc:ZDB-GENE-060822-1]	2.02241	0.0112885
F1QJD7	ENSDARG00000088713		si:ch211-226h8.14 [Source:ZFIN;Acc:ZDB-GENE-050208-470]	2.02338	0.041147
Q6DG30	ENSDARG00000055416	serpinb1	serpin peptidase inhibitor, clade B (ovalbumin), member 1 [Source:ZFIN;Acc:ZDB-GENE-040718-400]	2.02415	0.0216886
Q7ZVT2	ENSDARG00000099730	pkma	pyruvate kinase M1/2a [Source:ZFIN;Acc:ZDB-GENE-031201-4]	2.0348	0.00994077
Q1LYB7	ENSDARG00000044093	rpl13a	ribosomal protein L13a [Source:ZFIN;Acc:ZDB-GENE-030131-168]	2.04201	0.01826
F1QHJ1	ENSDARG00000030408	rps26l	ribosomal protein S26, like [Source:ZFIN;Acc:ZDB-GENE-040426-1706]	2.049	0.0351787
A2BFS6	ENSDARG00000061061	dpagt1	dolichyl-phosphate (UDP-N-acetylglucosamine) N-acetylglucosaminephosphotransferase 1 (GlcNAc-1-P transferase) [Source:ZFIN;Acc:ZDB-GENE-060526-18]	2.05101	0.021034
A0A0R4IY13	ENSDARG00000036968		si:ch1073-416d2.3 [Source:ZFIN;Acc:ZDB-GENE-131127-199]	2.05489	0.0206875
O73872	ENSDARG00000043848	sod1	superoxide dismutase 1, soluble [Source:NCBI gene;Acc:30553]	2.06352	0.0322891
E7F1U0	ENSDARG00000074894	myorg	myogenesis regulating glycosidase (putative) [Source:ZFIN;Acc:ZDB-GENE-091113-62]	2.06885	0.0254255
A0A2U3TW31	ENSDARG00000110223	katnb1	katanin p80 (WD repeat containing) subunit B 1 [Source:NCBI gene;Acc:406291]	2.0802	0.0277398
F8W3S9	ENSDARG00000074712		si:ch211-186e20.2 [Source:ZFIN;Acc:ZDB-GENE-110407-8]	2.08216	0.0148714
A0A2R8PXE0	ENSDARG00000116067	serpina7	serpin peptidase inhibitor, clade A (alpha-1 antiproteinase, antitrypsin), member 7 [Source:ZFIN;Acc:ZDB-GENE-041010-47]	2.09525	0.0129075
F1Q8L0	ENSDARG00000016307	mrpl46	mitochondrial ribosomal protein L46 [Source:ZFIN;Acc:ZDB-GENE-040718-224]	2.10186	0.0177209
Q1RMB1	ENSDARG00000068465		zgc:136254 [Source:ZFIN;Acc:ZDB-GENE-060421-3062]	2.102	0.0167967
A0A140LGF6	ENSDARG00000077934	tegt	testis enhanced gene transcript (BAX inhibitor 1) [Source:ZFIN;Acc:ZDB-GENE-030826-10]	2.10203	0.0309418
F1QRB8	ENSDARG00000056795	serpine1	serpin peptidase inhibitor, clade E (nexin, plasminogen activator inhibitor type 1), member 1 [Source:ZFIN;Acc:ZDB-GENE-070912-60]	2.11754	0.0219582
F1QIQ2	ENSDARG00000075892	bag6	BCL2 associated athanogene 6 [Source:ZFIN;Acc:ZDB-GENE-010501-5]	2.1239	0.0354891
E7FFZ3	ENSDARG00000115817		si:dkey-46g23.2 [Source:ZFIN;Acc:ZDB-GENE-070705-476]	2.12401	0.0141783
A0A0R4IE52	ENSDARG00000111299	alg12	ALG12 alpha-1,6-mannosyltransferase [Source:ZFIN;Acc:ZDB-GENE-041210-295]	2.12688	0.0368391
A0A2R9YJG8	ENSDARG00000018742	psme4b	proteasome activator subunit 4b [Source:NCBI gene;Acc:553346]	2.14988	0.0221122
F1R5F7	ENSDARG00000043342	gpx3	glutathione peroxidase 3 [Source:ZFIN;Acc:ZDB-GENE-070222-3]	2.15641	0.0165657
F1Q8Z1	ENSDARG00000078675	dock7	dedicator of cytokinesis 7 [Source:ZFIN;Acc:ZDB-GENE-050302-15]	2.16808	0.012792
F1RED5	ENSDARG00000116005		zgc:171446 [Source:ZFIN;Acc:ZDB-GENE-080205-1]	2.17027	0.0106724
Q6IQI6	ENSDARG00000043509	rpl11	ribosomal protein L11 [Source:ZFIN;Acc:ZDB-GENE-040625-147]	2.1726	0.0260397
F1Q7T3	ENSDARG00000045051	slc16a3	solute carrier family 16 member 3 [Source:ZFIN;Acc:ZDB-GENE-030131-5487]	2.17649	0.0192631
Q8JGS9	ENSDARG00000100392	rps18	ribosomal protein S18 [Source:NCBI gene;Acc:192300]	2.1882	0.0288591
A0A2R8QDL4	ENSDARG00000113118	slc43a1a	solute carrier family 43 member 1a [Source:ZFIN;Acc:ZDB-GENE-030131-6327]	2.2535	0.0150254
Q6P5M3	ENSDARG00000011405	rps9	ribosomal protein S9 [Source:ZFIN;Acc:ZDB-GENE-010724-15]	2.25739	0.0277783
B8JL23	ENSDARG00000055938	tspan14	tetraspanin 14 [Source:ZFIN;Acc:ZDB-GENE-060825-329]	2.2771	0.0420018
Q6NY74	ENSDARG00000003938	rpa1	replication protein A1 [Source:NCBI gene;Acc:327491]	2.28462	0.027431
A0A2R8QHE6	ENSDARG00000095741		si:ch1073-75o15.3 [Source:ZFIN;Acc:ZDB-GENE-100921-22]	2.28655	0.0417717
A0A0R4IJ02	ENSDARG00000093193	chia.6	chitinase, acidic.6 [Source:ZFIN;Acc:ZDB-GENE-030131-1140]	2.28985	0.0137162
B0V3V9	ENSDARG00000032087	sgsh	N-sulfoglucosamine sulfohydrolase (sulfamidase) [Source:ZFIN;Acc:ZDB-GENE-030131-4958]	2.29436	0.0161806
E7EZV4	ENSDARG00000088932		si:ch211-12h2.6 [Source:ZFIN;Acc:ZDB-GENE-091117-31]	2.30303	0.0368776
A3KQ75	ENSDARG00000087363		si:dkeyp-46h3.6 [Source:ZFIN;Acc:ZDB-GENE-060503-90]	2.30889	0.0431272
F1QYZ0	ENSDARG00000045910	tmem181	transmembrane protein 181 [Source:ZFIN;Acc:ZDB-GENE-060503-309]	2.30915	0.0129461
Q6DHT8	ENSDARG00000031776	fthl27	ferritin, heavy polypeptide-like 27 [Source:ZFIN;Acc:ZDB-GENE-040718-72]	2.33736	0.0132541
F6P928	ENSDARG00000055591	pipox	pipecolic acid oxidase [Source:ZFIN;Acc:ZDB-GENE-110627-2]	2.33751	0.015526
F1QWS5	ENSDARG00000079745		si:ch211-166a6.5 [Source:ZFIN;Acc:ZDB-GENE-030131-9913]	2.34326	0.0342179
F8W5C3	ENSDARG00000087143	serpina7	serpin peptidase inhibitor, clade A (alpha-1 antiproteinase, antitrypsin), member 7 [Source:ZFIN;Acc:ZDB-GENE-041010-47]	2.35037	0.0130616
Q6NX01	ENSDARG00000014386	galnt6	UDP-N-acetyl-alpha-D-galactosamine:polypeptide N-acetylgalactosaminyltransferase 6 (GalNAc-T6) [Source:ZFIN;Acc:ZDB-GENE-040426-2272]	2.36521	0.0104029
Q7T3H9	ENSDARG00000030166	hyi	hydroxypyruvate isomerase [Source:NCBI gene;Acc:393305]	2.37069	0.0144478
B8A4T6	ENSDARG00000031483	col9a1b	collagen, type IX, alpha 1b [Source:ZFIN;Acc:ZDB-GENE-040426-2410]	2.42058	0.0231538
Q6P5L3	ENSDARG00000013307	rpl19	ribosomal protein L19 [Source:NCBI gene;Acc:406489]	2.45391	0.0295907
A0A286Y8J9	ENSDARG00000113815		si:dkeyp-98a7.9 [Source:ZFIN;Acc:ZDB-GENE-050208-680]	2.49074	0.025464
F1QS97	ENSDARG00000040338	hvcn1	hydrogen voltage-gated channel 1 [Source:NCBI gene;Acc:436618]	2.49694	0.0222662
A0A0R4IZ62	ENSDARG00000102421	acp7	acid phosphatase 7, tartrate resistant (putative) [Source:NCBI gene;Acc:571830]	2.51029	0.015449
F1QS22	ENSDARG00000018461		zgc:56095 [Source:ZFIN;Acc:ZDB-GENE-040426-1948]	2.52152	0.0175283
F1QA36	ENSDARG00000086408		zgc:171717 [Source:ZFIN;Acc:ZDB-GENE-071004-25]	2.52677	0.0349861
F1R862	ENSDARG00000086221		si:ch211-226h8.4 [Source:ZFIN;Acc:ZDB-GENE-050208-376]	2.52922	0.0323661
F1QP30	ENSDARG00000093249		si:ch211-226h8.11 [Source:ZFIN;Acc:ZDB-GENE-050208-629]	2.54099	0.0363385
C4IXV6	ENSDARG00000078959	tpcn3	two pore segment channel 3 [Source:ZFIN;Acc:ZDB-GENE-141215-16]	2.63661	0.0330602
Q6IMW6	ENSDARG00000036298	rps13	ribosomal protein S13 [Source:ZFIN;Acc:ZDB-GENE-040625-52]	2.64772	0.0176824
A8E526	ENSDARG00000103433	rpl14	ribosomal protein L14 [Source:ZFIN;Acc:ZDB-GENE-030131-2085]	2.66673	0.024076
A0A2R8Q1C6	ENSDARG00000112656	rpl36a	ribosomal protein L36A [Source:NCBI gene;Acc:195819]	2.74801	0.0166812
X1WC46	ENSDARG00000061221		si:ch211-157j23.2 [Source:ZFIN;Acc:ZDB-GENE-030131-5686]	2.78021	0.0108264
Q5BKV9	ENSDARG00000037350	rpl9	ribosomal protein L9 [Source:ZFIN;Acc:ZDB-GENE-030131-8646]	2.84982	0.0160266
F1QIR8	ENSDARG00000087584		si:dkeyp-98a7.9 [Source:ZFIN;Acc:ZDB-GENE-050208-680]	2.88058	0.0154875
H0WEB6	ENSDARG00000088895		si:dkeyp-98a7.7 [Source:ZFIN;Acc:ZDB-GENE-050208-520]	2.8823	0.0248847
F1RA25	ENSDARG00000008541	chia.4	chitinase, acidic.4 [Source:ZFIN;Acc:ZDB-GENE-030131-9279]	3.06035	0.0100178
A8KBW0	ENSDARG00000116307		zgc:174260 [Source:ZFIN;Acc:ZDB-GENE-080213-9]	3.10133	0.0138317
Q6IQV0	ENSDARG00000014222		zgc:86598 [Source:ZFIN;Acc:ZDB-GENE-040625-181]	3.12288	0.0265823
A0A2R8QGS9	ENSDARG00000109720	ech1	enoyl CoA hydratase 1, peroxisomal [Source:ZFIN;Acc:ZDB-GENE-041010-170]	3.20861	0.0142168
H0WED7	ENSDARG00000094674		si:dkeyp-98a7.8 [Source:ZFIN;Acc:ZDB-GENE-050208-600]	3.24137	0.0171048
A0A0R4IF34	ENSDARG00000100633		zgc:114200 [Source:ZFIN;Acc:ZDB-GENE-050913-96]	3.29589	0.0163731
Q6PBY1	ENSDARG00000035692	rps3a	ribosomal protein S3A [Source:NCBI gene;Acc:337240]	3.36133	0.0204564
A0A2R8PVM3	ENSDARG00000115432		zgc:174259 [Source:ZFIN;Acc:ZDB-GENE-080213-10]	3.45995	0.0103258
Q7ZW95	ENSDARG00000041182	rpl4	ribosomal protein L4 [Source:ZFIN;Acc:ZDB-GENE-030131-9034]	3.52892	0.00875196
Q7T1K0	ENSDARG00000057556	rpl17	ribosomal protein L17 [Source:ZFIN;Acc:ZDB-GENE-030131-8585]	3.5414	0.011481
Q6DHL6	ENSDARG00000019778	rps6	ribosomal protein S6 [Source:ZFIN;Acc:ZDB-GENE-040801-8]	3.61508	0.0110575
A0A2R8PXE5	ENSDARG00000094392		si:dkey-229d11.5 [Source:ZFIN;Acc:ZDB-GENE-030131-5342]	3.68875	0.0095172
Q90Z10	ENSDARG00000099380	rpl13	ribosomal protein L13 [Source:NCBI gene;Acc:378961]	4.12156	0.0167582
Q24JV1	ENSDARG00000054818	rpl32	ribosomal protein L32 [Source:ZFIN;Acc:ZDB-GENE-060331-105]	4.3796	0.0120219
F1QGI3	ENSDARG00000006316	rpl23a	ribosomal protein L23a [Source:ZFIN;Acc:ZDB-GENE-030131-7479]	4.71862	0.00917064
A1A5V7	ENSDARG00000080006	tmem41b	transmembrane protein 41B [Source:NCBI gene;Acc:561208]	9.67728	0.0462267
Q6PC30	ENSDARG00000057624	cops5	COP9 signalosome subunit 5 [Source:NCBI gene;Acc:393698]	10.2037	0.0477342
F1Q7Y4	ENSDARG00000035633	tctn2	tectonic family member 2 [Source:ZFIN;Acc:ZDB-GENE-030131-751]	10.2832	0.0469228
E9QIR9	ENSDARG00000025581	rpl10	ribosomal protein L10 [Source:NCBI gene;Acc:336712]	10.5519	0.0427721
B8JIB4	ENSDARG00000057064	enpep	glutamyl aminopeptidase [Source:ZFIN;Acc:ZDB-GENE-050309-218]	10.5734	0.0475068
A0A2R9YJI1	ENSDARG00000078457		si:ch211-250e5.16 [Source:ZFIN;Acc:ZDB-GENE-030131-6052]	10.6753	0.0454083
F6NWZ6	ENSDARG00000067524	fut9b	fucosyltransferase 9b [Source:ZFIN;Acc:ZDB-GENE-030131-9925]	10.8649	0.0408413
Q5BL29	ENSDARG00000070447	slc39a9	solute carrier family 39 member 9 [Source:NCBI gene;Acc:541413]	10.989	0.0484167
Q6NZ32	ENSDARG00000039211		zgc:77439 [Source:ZFIN;Acc:ZDB-GENE-031010-24]	12.8727	7.70133e-05
Q9DGE2	ENSDARG00000000857	mapk14a	mitogen-activated protein kinase 14a [Source:NCBI gene;Acc:65237]	13.1276	3.85066e-05
Q1LUQ4	ENSDARG00000032318	mfsd6a	major facilitator superfamily domain containing 6a [Source:NCBI gene;Acc:100034426]	14.4087	0.00558425
E7FAT7	ENSDARG00000060484	selenoi	selenoprotein I [Source:ZFIN;Acc:ZDB-GENE-091204-137]	14.5544	0.00034656
F8W5D3	ENSDARG00000077960		si:ch211-186e20.7 [Source:ZFIN;Acc:ZDB-GENE-110407-6]	15.0695	0.00023104
A0A2R8PY83	ENSDARG00000098586		zgc:194887 [Source:ZFIN;Acc:ZDB-GENE-081022-162]	15.4202	0.00246443
Q24JV3	ENSDARG00000053365	rpl31	ribosomal protein L31 [Source:ZFIN;Acc:ZDB-GENE-060331-121]	15.4402	0.00011552
