# Supplementary material for: Dysregulated heparan sulfate proteoglycan metabolism promotes Ewing sarcoma tumor growth
Source: eLife. 2022 Mar 14;11:e69734. doi: 10.7554/eLife.69734 (PMC8942468; doi:10.7554/eLife.69734)
Supplement: Supplementary file 4. [file elife-69734-supp4.xlsx]

## Sheet: Sheet1
Supplemental Table 4: List of Primers for RT-PCR
Gene	Species	Primer	Seq	Product Length, bp
EWSR1-FLI1	Human	Forward	TGGCACTCAGCCTGCTTATC	137
		Reverse	CTAGGCTGGGCTGGTTGTAA
EWSR1-FLI1	Human	Forward	CAGCCTCCCACTAGTTACCC	124
		Reverse	TACTGATCGTTTGTGCCCCTC
nr0b1	Zebrafish	Forward	AGCGGATTTTAACGAGCGGA	122
		Reverse	GCTTATGTCCAGTCCCCAGC
gapdh	Zebrafish	Forward	GTGGCCATCAATGACCCATTC	117
		Reverse	CAATGACCAGTTTGCCGCCTTC
